# Supplementary material
Source: PubMed Central journal article supplement (PMC7036039)

# Cyanomethylation of Substituted Fluorenes and Oxindoles with Alkyl Nitriles

Gang Hong, Pradip D. Nahide, and Marisa C. Kozlowski\*

Department of Chemistry, Roy and Diana Vagelos Laboratories, University of Pennsylvania, Philadelphia, Pennsylvania 19104, United States

## Supporting Information

### Contents

|                                                                                 |     |
|---------------------------------------------------------------------------------|-----|
| Experimental Section .....                                                      | S2  |
| 1.1 General Experimental Procedures .....                                       | S2  |
| 1.2 Optimization of the Reaction Conditions .....                               | S3  |
| 1.3 Mechanistic Probes .....                                                    | S5  |
| 1.4 Characterization Data of Products .....                                     | S11 |
| 1.5 Derivatization of Product <b>3aa</b> .....                                  | S29 |
| References .....                                                                | S30 |
| Copies of <sup>1</sup> H NMR, <sup>13</sup> C NMR and <sup>19</sup> F NMR ..... | S31 |

## Experimental Section

**Caution:** Di-*tert*-butyl peroxide is a strong oxidizer and can be explosive. Exposure inhalation or skin contact is harmful. All experiments involving peroxy compounds should be carried out behind a safety shield and in a fume hood.<sup>1</sup>

All non-aqueous reactions were carried out under an atmosphere of dry argon unless otherwise noted. Commercial reagents were used as received without additional purification unless otherwise noted. 3-Substituted oxindoles used in this study were prepared according to the literature.<sup>2</sup> 9-Substituted fluorenes were prepared according to the literature.<sup>3</sup> Reaction mixtures were heated in vials on thermostatted metal blocks using Ika plates. Reactions were monitored by thin layer chromatography (TLC) using Silicycle glass-backed TLC plates with 250  $\mu\text{m}$  silica and F254 indicator. Visualization was accomplished by UV light.

<sup>1</sup>H NMR, <sup>13</sup>C NMR, and <sup>19</sup>F NMR spectra were recorded on a AM-500 Fourier transform NMR spectrometer at 500 MHz, 125 MHz, 376 MHz respectively. Chemical shifts are reported relative to the solvent resonance peak  $\delta$  7.26 (CDCl<sub>3</sub>) for <sup>1</sup>H and  $\delta$  77.16 (CDCl<sub>3</sub>) for <sup>13</sup>C. Data are reported as follows: chemical shift, multiplicity (s = singlet, d = doublet, t = triplet, q = quartet, b = broad singlet, m = multiplet), coupling constants, and number of protons. High resolution mass spectra were obtained using a VG autospec with an ionization mode of EI or ESI-TOF. Infrared spectra are reported in cm<sup>-1</sup>. Column chromatography was performed with silica gel (50-63  $\mu\text{m}$  mesh particle size).

### 1.1 General Experimental Procedures

**General procedure A – cyanomethylation of 3-substituted oxindoles in acetonitrile.** Oxindole **1** (0.15 mmol) was added to a flame-dried 8 mL microwave vial equipped with stir bar and was

brought into the glovebox. Acetonitrile **2a** (0.10 M, 1.5 mL) and *t*-BuOO*t*-Bu (110  $\mu$ L, 4.00 equiv) were added to the mixture sequentially. The microwave vial was sealed with a Teflon cap, removed from the glovebox, and placed in a 130 °C oil bath. After 24 h, the mixture was allowed to cool to ambient temperature and was concentrated. The residue was chromatographed (EtOAc/hexanes) to afford the product **3**.

### General procedure B – cyanomethylation of 9-substituted fluorenes in neat alkyl nitriles.

Fluorene **5** (0.15 mmol) was added to a flame-dried 8 mL microwave vial equipped with stir bar and was brought into the glovebox. PivOH (31 mg, 0.30 mmol, 2.0 equiv), alkyl nitrile **2** (0.10 M, 1.5 mL) and *t*-BuOO*t*-Bu (165  $\mu$ L, 6.00 equiv) were added to the mixture sequentially. The microwave vial was sealed with a Teflon cap, removed from the glovebox, and placed in a 125 °C oil bath. After 23 h, the mixture was allowed to cool to ambient temperature and was concentrated. The residue was chromatographed (EtOAc/hexanes) to afford the desired product **6**.

### 1.2 Optimization of the Reaction Conditions

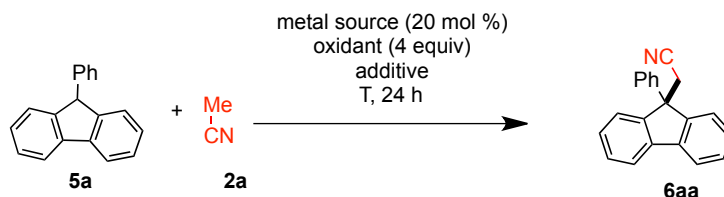

**Table S1.**

| Entry | Metal source                            | Oxidant <sup>a</sup>                | Additive (equiv)                               | T (°C) | Yield (%) <sup>b</sup> |
|-------|-----------------------------------------|-------------------------------------|------------------------------------------------|--------|------------------------|
| 1     | CuBr                                    | <i>t</i> -BuOO <i>t</i> -Bu         | Phen (0.2)                                     | 130    | 0                      |
| 2     | Cu(OTf) <sub>2</sub>                    | <i>t</i> -BuOO <i>t</i> -Bu         | Phen (0.2)/Na <sub>3</sub> PO <sub>4</sub> (2) | 130    | 23                     |
| 3     | CuI                                     | <i>t</i> -BuOO <i>t</i> -Bu         | Phen (0.2)                                     | 130    | 0                      |
| 4     | Cu(OAc) <sub>2</sub>                    | <i>t</i> -BuOO <i>t</i> -Bu         | Phen (0.2)/PivOH (2)                           | 130    | 0                      |
| 5     | CuCl                                    | <i>t</i> -BuOO <i>t</i> -Bu         |                                                | 130    | 26                     |
| 6     | CuCN                                    | <i>t</i> -BuOO <i>t</i> -Bu         |                                                | 130    | 46                     |
| 7     | Pd(OAc) <sub>2</sub>                    | <i>t</i> -BuOO <i>t</i> -Bu         |                                                | 130    | 48                     |
| 8     | Co(OAc) <sub>2</sub> ·4H <sub>2</sub> O | <i>t</i> -BuOO <i>t</i> -Bu         |                                                | 130    | 36                     |
| 9     | Mn(OAc) <sub>3</sub> ·2H <sub>2</sub> O | <i>t</i> -BuOO <i>t</i> -Bu         |                                                | 130    | 0                      |
| 10    | Ferrocene                               | <i>t</i> -BuOO <i>t</i> -Bu         |                                                | 130    | 28                     |
| 11    | FeCl <sub>3</sub>                       | Ag <sub>2</sub> CO <sub>3</sub> (2) |                                                | 130    | 13                     |

|           |                      |                                     |                                       |            |                                     |
|-----------|----------------------|-------------------------------------|---------------------------------------|------------|-------------------------------------|
| 12        | FeCl <sub>3</sub>    | <i>t</i> -BuOO <i>t</i> -Bu         | Ag <sub>2</sub> CO <sub>3</sub> (2)   | 130        | 53 <sup>c</sup>                     |
| 13        | Sc(OTf) <sub>3</sub> | Ag <sub>2</sub> O (2)               |                                       | 130        | 15                                  |
| 14        |                      | <i>t</i> -BuOO <i>t</i> -Bu         | Ag <sub>2</sub> CO <sub>3</sub> (0.2) | 130        | 49 <sup>c</sup>                     |
| 15        |                      | <i>t</i> -BuOO <i>t</i> -Bu         |                                       | 130        | 54 <sup>c</sup>                     |
| 16        |                      | DCP                                 |                                       | 130        | 9                                   |
| 17        |                      | BzOOBz                              |                                       | 130        | 46                                  |
| 18        |                      | TBPB                                |                                       | 130        | 25                                  |
| 19        |                      | <i>t</i> -BuOOH                     |                                       | 130        | 41                                  |
| 20        |                      | <i>t</i> -BuOO <i>t</i> -Bu         | KO <sup>t</sup> Bu (1)                | 130        | 0                                   |
| 21        |                      | <i>t</i> -BuOO <i>t</i> -Bu         | Cs <sub>2</sub> CO <sub>3</sub> (2)   | 130        | 0                                   |
| 22        |                      | <i>t</i> -BuOO <i>t</i> -Bu         | DBU (2)                               | 130        | trace                               |
| 23        |                      | <i>t</i> -BuOO <i>t</i> -Bu         | PivOH (2)                             | 130        | 60 <sup>c</sup>                     |
| 24        |                      | <i>t</i> -BuOO <i>t</i> -Bu         | HOAc (1)                              | 130        | 45                                  |
| 25        |                      | <i>t</i> -BuOO <i>t</i> -Bu         | TsOH (2)                              | 130        | 11                                  |
| 26        |                      | <i>t</i> -BuOO <i>t</i> -Bu         | KI (0.3)                              | 130        | 33                                  |
| 27        |                      | <i>t</i> -BuOO <i>t</i> -Bu         | TBAI (0.2)                            | 130        | 48                                  |
| 28        |                      | <i>t</i> -BuOO <i>t</i> -Bu         | PivOH (1)                             | 130        | 56 <sup>c</sup>                     |
| <b>29</b> |                      | <b><i>t</i>-BuOO<i>t</i>-Bu (6)</b> | <b>PivOH (2)</b>                      | <b>125</b> | <b>65<sup>c,d</sup></b>             |
| 30        |                      | <i>t</i> -BuOO <i>t</i> -Bu (6)     | PivOH (2)                             | 125        | 46 <sup>e</sup> (67) <sup>c,f</sup> |

<sup>a</sup>CHP = cumene hydroperoxide, TBPB = *tert*-butyl peroxybenzoate, DCP = dicumylperoxide. <sup>b</sup>Reaction on 0.15 mmol scale and yields analyzed by <sup>1</sup>H NMR analysis using 4,4'-dimethoxybenzil as an internal standard. <sup>c</sup>Isolated yield. <sup>d</sup>23 h. <sup>e</sup>16 h. <sup>f</sup>36 h

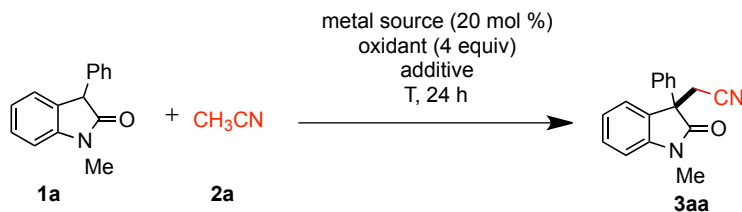

**Table S2.**

| Entry | Metal source          | Oxidant <sup>a</sup>            | Additive (equiv)                               | T (°C) | Yield (%) <sup>b</sup> |
|-------|-----------------------|---------------------------------|------------------------------------------------|--------|------------------------|
| 1     | Cu(OTf) <sub>2</sub>  | <i>t</i> -BuOO <i>t</i> -Bu     | Phen (0.5)/Na <sub>3</sub> PO <sub>4</sub> (2) | 120    | 16                     |
| 2     | Cu(OTf) <sub>2</sub>  | <i>t</i> -BuOO <i>t</i> -Bu     | Phen (0.5)                                     | 120    | 20                     |
| 3     | Cu(OAc) <sub>2</sub>  | <i>t</i> -BuOO <i>t</i> -Bu     |                                                | 120    | 16                     |
| 4     | Cu                    | <i>t</i> -BuOO <i>t</i> -Bu     |                                                | 120    | 22                     |
| 5     | Cu <sub>2</sub> O     | <i>t</i> -BuOO <i>t</i> -Bu     |                                                | 120    | 17                     |
| 6     | CuBr (1)              | <i>t</i> -BuOO <i>t</i> -Bu     |                                                | 120    | 30                     |
| 7     | CuCl                  | <i>t</i> -BuOO <i>t</i> -Bu     |                                                | 120    | 23                     |
| 8     | FeCl <sub>3</sub>     | Ag <sub>2</sub> CO <sub>3</sub> |                                                | 120    | 34 <sup>b</sup>        |
| 9     | FeCl <sub>3</sub>     | <i>t</i> -BuOO <i>t</i> -Bu     |                                                | 120    | 12                     |
| 10    | Fe(acac) <sub>3</sub> | <i>t</i> -BuOO <i>t</i> -Bu     |                                                | 120    | trace                  |
| 11    | Ferrocene             | <i>t</i> -BuOO <i>t</i> -Bu     |                                                | 120    | 33                     |
| 12    | Sc(OTf) <sub>3</sub>  | Ag <sub>2</sub> O (2)           |                                                | 120    | 30                     |
| 13    | Sc(OTf) <sub>3</sub>  | <i>t</i> -BuOO <i>t</i> -Bu     |                                                | 120    | 12                     |

|           |                                      |                                              |                                     |                                   |                 |
|-----------|--------------------------------------|----------------------------------------------|-------------------------------------|-----------------------------------|-----------------|
| 14        | Zn(OTf) <sub>2</sub>                 | <i>t</i> -BuOO <i>t</i> -Bu                  | 120                                 | trace                             |                 |
| 15        | Pd(OAc) <sub>2</sub>                 | <i>t</i> -BuOO <i>t</i> -Bu                  | 120                                 | 34 <sup>b</sup>                   |                 |
| 16        | PdCl <sub>2</sub>                    | <i>t</i> -BuOO <i>t</i> -Bu                  | 120                                 | 22                                |                 |
| 17        | Pd(OAc) <sub>2</sub>                 | K <sub>2</sub> S <sub>2</sub> O <sub>8</sub> | 120                                 | 0                                 |                 |
| 18        | CoCl <sub>2</sub> ·6H <sub>2</sub> O | <i>t</i> -BuOO <i>t</i> -Bu                  | 120                                 | 27                                |                 |
| 19        | Ni(OAc) <sub>2</sub>                 | <i>t</i> -BuOO <i>t</i> -Bu                  | 120                                 | 8                                 |                 |
| 20        | AlCl <sub>3</sub>                    | <i>t</i> -BuOO <i>t</i> -Bu                  | 120                                 | 0                                 |                 |
| 21        |                                      | <i>t</i> -BuOO <i>t</i> -Bu                  | 120                                 | 40 <sup>c</sup>                   |                 |
| 22        |                                      | TBPB                                         | 120                                 | 38                                |                 |
| 23        |                                      | <i>t</i> -BuOOH                              | 120                                 | trace                             |                 |
| 24        |                                      | CHP                                          | 120                                 | 0                                 |                 |
| 25        |                                      | BzOOBz                                       | 120                                 | 30                                |                 |
| 26        |                                      | DCP                                          | 120                                 | 38                                |                 |
| <b>27</b> |                                      | <b><i>t</i>-BuOO<i>t</i>-Bu</b>              | <b>130</b>                          | <b>48<sup>c</sup></b>             |                 |
| 28        |                                      | <i>t</i> -BuOO <i>t</i> -Bu                  | 100                                 | 14                                |                 |
| 29        |                                      | <i>t</i> -BuOO <i>t</i> -Bu (2)              | 130                                 | 25                                |                 |
| 30        |                                      | <i>t</i> -BuOO <i>t</i> -Bu (6)              | 130                                 | 41                                |                 |
| 31        |                                      | <i>t</i> -BuOO <i>t</i> -Bu                  | 130                                 | 46 <sup>c,d</sup>                 |                 |
| 32        |                                      | <i>t</i> -BuOO <i>t</i> -Bu                  | 130                                 | 35 <sup>e</sup> (47) <sup>f</sup> |                 |
| 33        |                                      | <i>t</i> -BuOO <i>t</i> -Bu                  | KOH (1)                             | 130                               | 0               |
| 34        |                                      | <i>t</i> -BuOO <i>t</i> -Bu                  | Na <sub>3</sub> PO <sub>4</sub> (2) | 130                               | 9               |
| 35        |                                      | <i>t</i> -BuOO <i>t</i> -Bu                  | DBU (1)                             | 130                               | 0               |
| 36        |                                      | <i>t</i> -BuOO <i>t</i> -Bu                  | Cs <sub>2</sub> CO <sub>3</sub> (2) | 130                               | 0               |
| 37        |                                      | <i>t</i> -BuOO <i>t</i> -Bu                  | PivOH (2)                           | 130                               | 29              |
| 38        |                                      | <i>t</i> -BuOO <i>t</i> -Bu                  | AcOH (2)                            | 130                               | 33              |
| 39        |                                      | <i>t</i> -BuOO <i>t</i> -Bu                  | TsOH (2)                            | 130                               | 0               |
| 40        |                                      | <i>t</i> -BuOO <i>t</i> -Bu                  | TBAI (0.2)                          | 130                               | 39              |
| 41        |                                      | <i>t</i> -BuOO <i>t</i> -Bu                  | I <sub>2</sub> (0.25)               | 130                               | 0               |
| 42        |                                      | <i>t</i> -BuOO <i>t</i> -Bu                  |                                     | 130                               | 27 <sup>g</sup> |

<sup>a</sup>CHP = cumene hydroperoxide, TBPB = *tert*-butyl peroxybenzoate, DCP = dicumylperoxide. <sup>b</sup>Reaction on 0.15 mmol scale and yields analyzed by <sup>1</sup>H NMR analysis using 4,4'-dimethoxybenzil as an internal standard. <sup>c</sup>Isolated yield. <sup>d</sup>*t*-BuOO*t*-Bu was added in two portions. <sup>e</sup>16 h. <sup>f</sup>36 h. <sup>g</sup>5 mL CH<sub>3</sub>CN

### 1.3 Mechanistic Probes

#### Radical inhibitor/trap experiments.

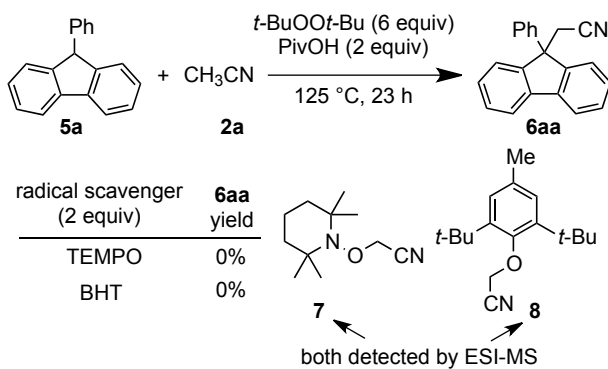

Compound **5a** (36 mg, 0.15 mmol) was added to a flame-dried 8 mL microwave vial equipped with a stir bar and was brought into the glovebox. TEMPO (47 mg, 2.0 equiv), PivOH (31 mg, 0.30 mmol, 2.0 equiv), acetonitrile (0.10 M, 1.5 mL), and *t*-BuOO*t*-Bu (165  $\mu$ L, 6.00 equiv) were added to the mixture sequentially. The microwave vial was sealed with a Teflon cap, removed from the glovebox, and placed in a 125  $^\circ$ C oil bath. After 23 h, the mixture was allowed to cool to ambient temperature. Part of the mixture was analyzed by UPLC-MS, and the TEMPO-adduct was observed.

Figure S1.

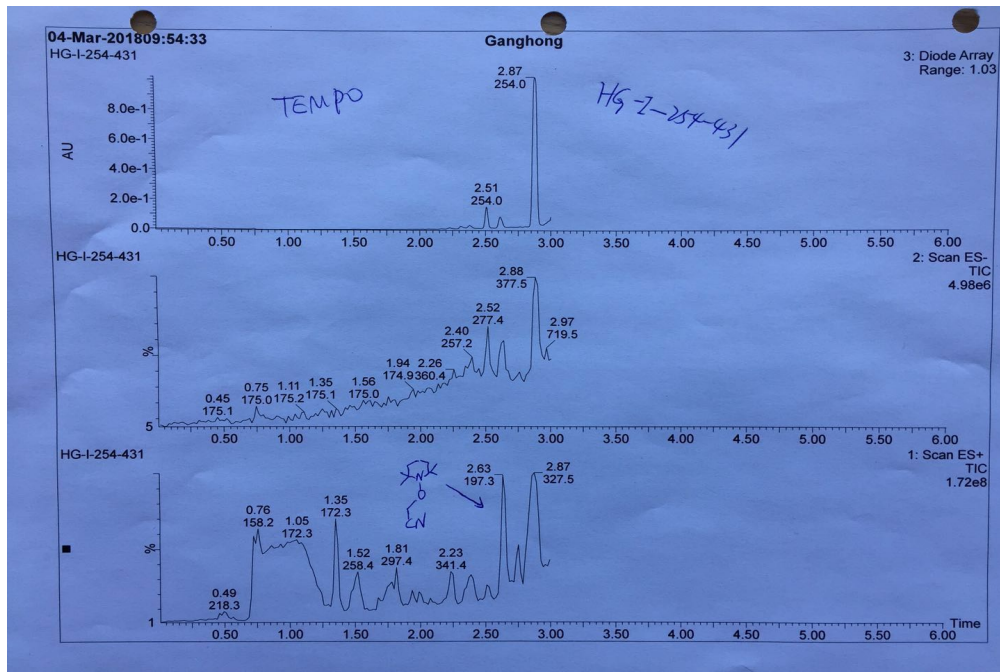

Figure S2.

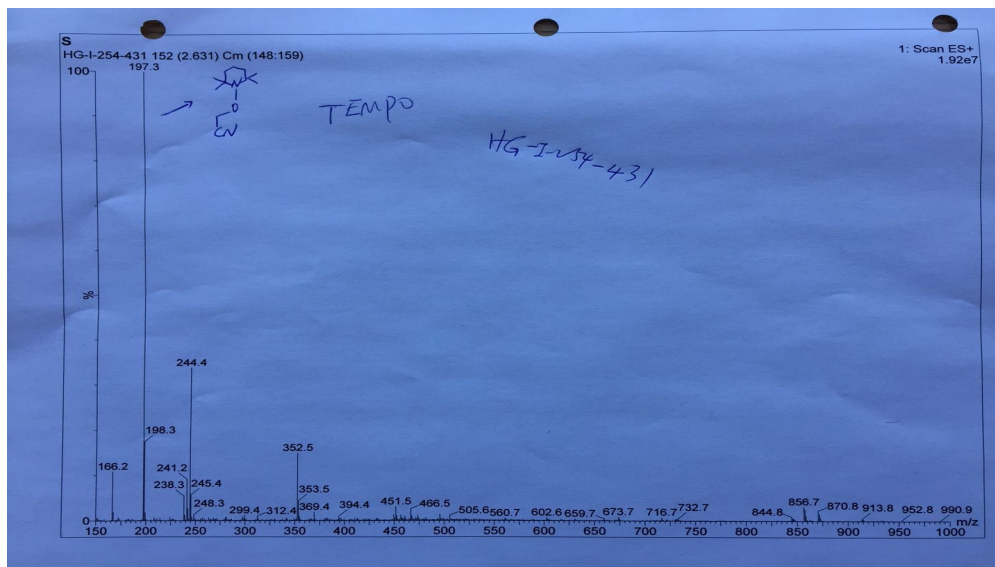

When the BHT (66 mg, 2.0 equiv) was added to the reaction of **5a** with **2a** under the standard conditions, no desired product **6aa** was detected, and the BHT-adduct was also observed.

Figure S3.

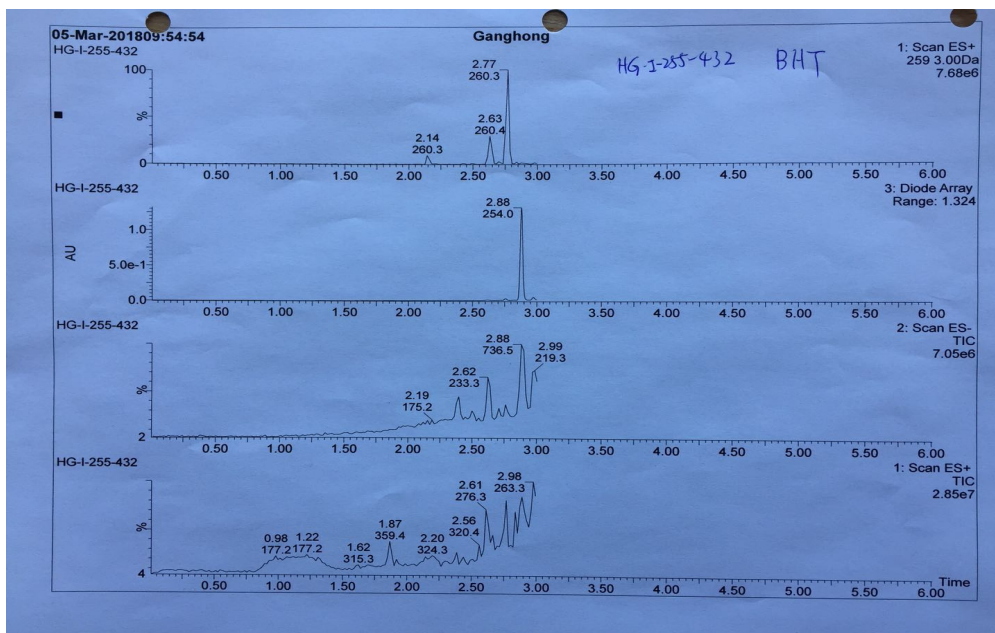

Figure S4.

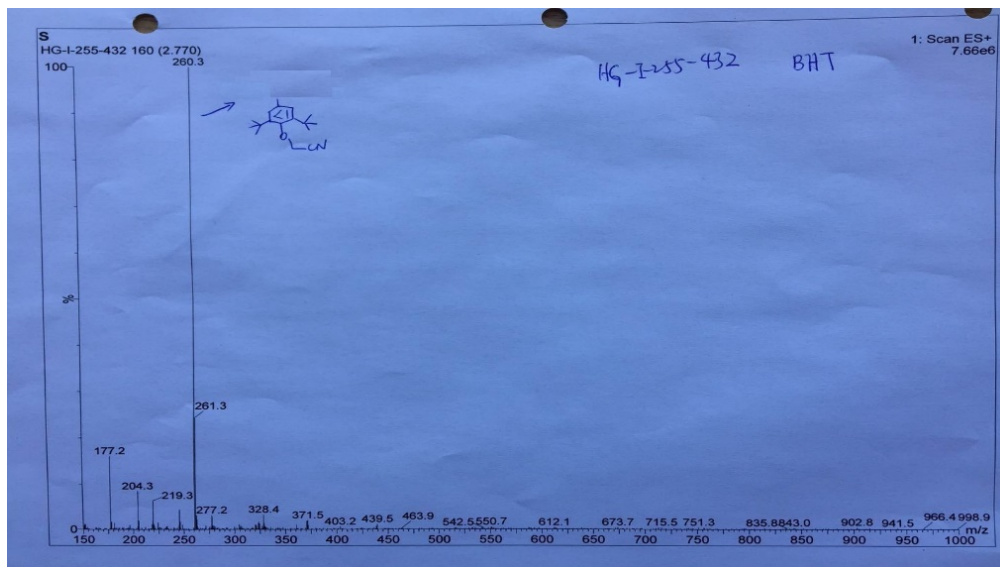

### Radical clock experiment.

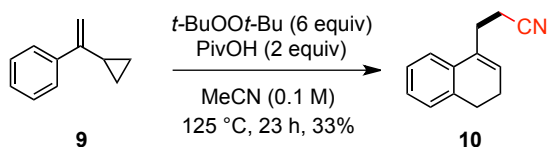

Starting material **9** was synthesized according to literature procedure.<sup>4</sup> Alkene **9** (22 mg, 0.15 mmol) was submitted to the general procedure A. Purification by flash chromatography (100:7 hexane/EtOAc) afforded compound **10** in 33% yield (9.1 mg) as a pale yellow oil. <sup>1</sup>H NMR (500 MHz, CDCl<sub>3</sub>) δ 7.24-7.13 (m, 3H), 7.12 (d, *J* = 7.5 Hz, 1H), 6.00 (t, *J* = 1.5 Hz, 1H), 2.84-2.79 (m, 2H), 2.76 (t, *J* = 8.0 Hz, 2H), 2.57 (t, *J* = 7.5 Hz, 2H), 2.32-2.27 (m, 2H). Spectral data match those previously reported.<sup>4</sup>



## Competitive KIE experiment.

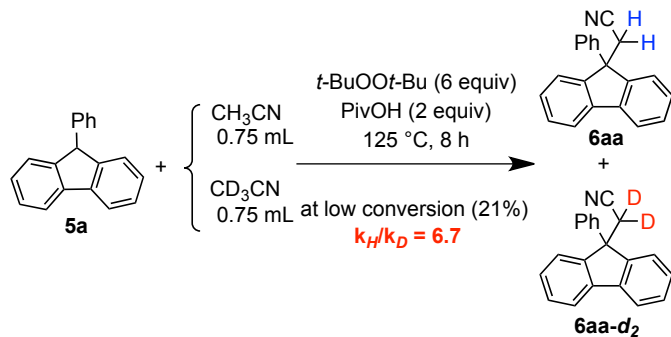

$\text{CD}_3\text{CN}$  (99.9%) was purchased from Cambridge Isotope Laboratories and was used without further purification. Compound **5a** (36 mg, 0.15 mmol) was added to a flame-dried 8 mL microwave vial equipped with stir bar and was brought into the glovebox.  $\text{PivOH}$  (31 mg, 0.30 mmol, 2.0 equiv), acetonitrile/ $\text{D}_3$ -acetonitrile (1:1, 1.5 mL), and  $t\text{-BuOO}t\text{-Bu}$  (165  $\mu\text{L}$ , 6.00 equiv) were added to the mixture sequentially. The microwave vial was sealed with a Teflon cap, removed from the glovebox, and placed in a  $125\text{ }^\circ\text{C}$  oil bath. After 8 h, the mixture was allowed to cool to ambient temperature, diluted with  $\text{CH}_2\text{Cl}_2$  (1 mL), and concentrated. The residue was chromatographed (EtOAc/hexanes) to afford the corresponding product in 21% yield (8.8 mg).

The product was analyzed by  $^1\text{H}$  NMR (Figure S5):

Figure S5.

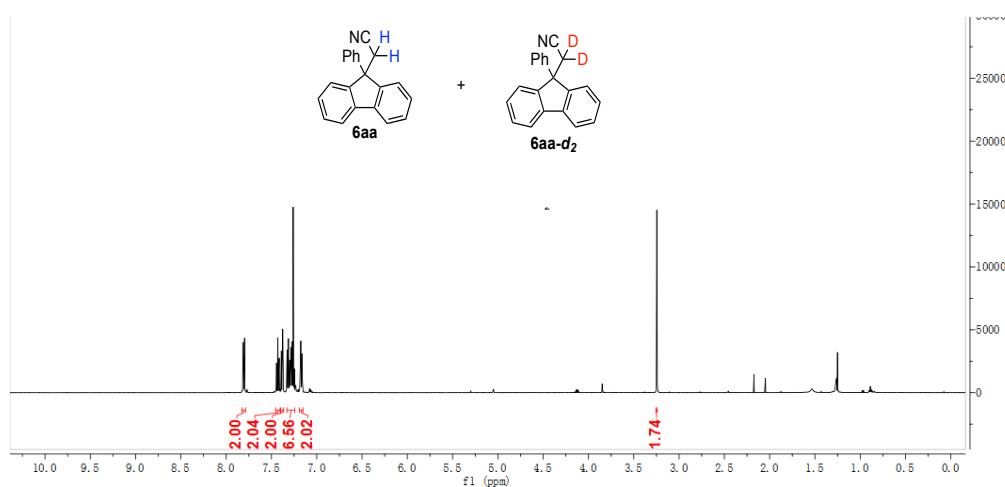

### Using dimer intermediates as substrates.

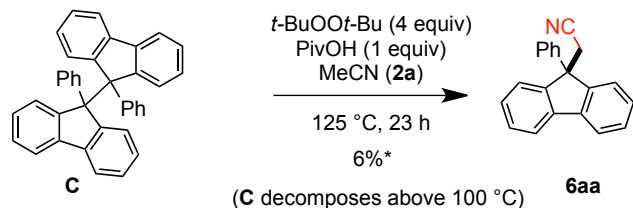

The dimer (**C**) of fluorene **5a** (34 mg, 0.07 mmol)<sup>5</sup> was added to a flame-dried 8 mL microwave vial equipped with stir bar and was brought into the glovebox. PivOH (7.0 mg, 0.07 mmol, 1.0 equiv), acetonitrile **2a** (0.05 M, 1.5 mL) and *t*-BuOO*t*-Bu (39  $\mu$ L, 0.28 mmol, 4.00 equiv) were added to the mixture sequentially. The microwave vial was sealed with a Teflon cap, removed from the glovebox, and placed in a 125 °C oil bath. After 23 h, the mixture was allowed to cool to ambient temperature and was concentrated. The mixture was analyzed by <sup>1</sup>H NMR spectroscopy use CH<sub>2</sub>Br<sub>2</sub> as an internal standard: 6% yield. Dimer **C** decomposed above 100 °C accounting for the low yield.

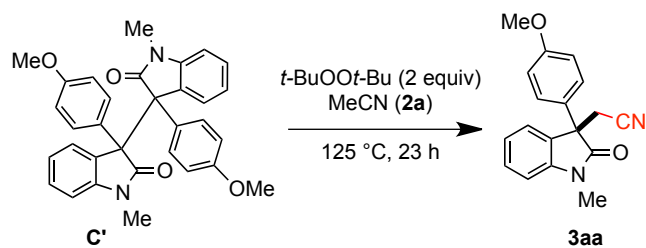

The dimer (**C'**) of oxindole **1a** (35 mg, 0.070 mmol)<sup>6</sup> was added to a flame-dried 8 mL microwave vial equipped with stir bar and was brought into the glovebox. Acetonitrile **2a** (0.10 M, 0.7 mL) and *t*-BuOO*t*-Bu (26  $\mu$ L, 0.14 mmol, 2.00 equiv) were added to the mixture sequentially. The microwave vial was sealed with a Teflon cap, removed from the glovebox, and placed in a 130 °C oil bath. After 24 h, the mixture was allowed to cool to ambient temperature and was concentrated. The mixture was analyzed by <sup>1</sup>H NMR spectroscopy use CH<sub>2</sub>Br<sub>2</sub> as an internal standard: 20% yield.

## 1.4 Characterization Data of Products

### 2-(1-Methyl-2-oxo-3-phenylindolin-3-yl)acetonitrile (**3aa**)

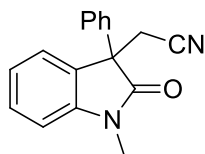

General procedure A was followed using **1a** (34 mg, 0.15 mmol), and *t*-BuOO*t*-Bu (110  $\mu$ L, 4.00 equiv) in acetonitrile **2a** (1.5 mL, 0.10 M) at 130  $^{\circ}$ C for 24 h. Chromatography (12% EtOAc/hexanes) afforded **3aa** in 48% yield (19 mg) as an amorphous brown solid:  $^1\text{H}$  NMR (500 MHz,  $\text{CDCl}_3$ )  $\delta$  7.53 (d,  $J = 7.5$  Hz, 1H), 7.44 (td,  $J = 8.0, 1.5$  Hz, 1H), 7.36-7.30 (m, 5H), 7.22 (t,  $J = 7.5$  Hz, 1H), 6.98 (d,  $J = 8.0$  Hz, 1H), 3.38 (d,  $J = 17.0$  Hz, 1H), 3.25 (s, 3H), 3.05 (d,  $J = 17.0$  Hz, 1H);  $^{13}\text{C}$  NMR (125 MHz,  $\text{CDCl}_3$ )  $\delta$  175.6, 143.5, 136.4, 129.6, 129.3, 128.9, 128.3, 126.7, 125.2, 123.3, 116.3, 108.9, 52.6, 26.7, 26.3; IR (film) 2925, 2250, 1714, 1611, 1471, 1371, 755, 696  $\text{cm}^{-1}$ ; HRMS (EI-TOF) calcd for  $\text{C}_{17}\text{H}_{14}\text{N}_2\text{O}$   $[\text{M}]^+$   $m/z = 262.1106$ ; found 262.1098.

### 2-(1-Methyl-2-oxo-3-(*p*-tolyl)indolin-3-yl)acetonitrile (**3ba**)

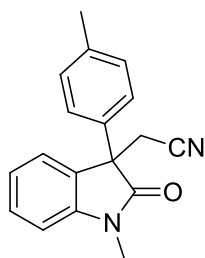

General procedure A was followed using **1b** (36 mg, 0.15 mmol), and *t*-BuOO*t*-Bu (110  $\mu$ L, 4.00 equiv) in acetonitrile **2a** (1.5 mL, 0.10 M) at 130  $^{\circ}$ C for 24 h. Chromatography (12% EtOAc/hexanes) afforded **3ba** in 38% yield (16 mg) as a colorless oil:  $^1\text{H}$  NMR (500 MHz,  $\text{CDCl}_3$ )  $\delta$  7.52 (d,  $J = 7.5$  Hz, 1H), 7.44 (td,  $J = 7.5, 1.0$  Hz, 1H), 7.23-7.19 (m, 3H), 7.14 (d,  $J = 8.0$  Hz, 2H), 6.97 (d,  $J = 8.0$  Hz, 1H), 3.37 (d,  $J = 16.5$  Hz, 1H), 3.24 (s, 3H), 3.02 (d,  $J = 16.5$  Hz, 1H),

2.32 (s, 3H);  $^{13}\text{C}$  NMR (125 MHz,  $\text{CDCl}_3$ )  $\delta$  176.0, 143.7, 138.4, 133.6, 129.9, 129.8, 129.7, 126.8, 125.3, 123.5, 116.7, 109.1, 52.5, 26.9, 26.5, 21.1; IR (film) 2924, 2249, 1713, 1611, 1470, 1371, 754,  $690\text{ cm}^{-1}$ ; HRMS (EI-TOF) calcd for  $\text{C}_{18}\text{H}_{16}\text{N}_2\text{O}$   $[\text{M}]^+$   $m/z = 276.1263$ ; found 276.1261.

### 2-(3-(4-Methoxyphenyl)-1-methyl-2-oxindolin-3-yl)acetonitrile (3ca)

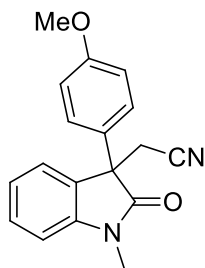

General procedure A was followed using **1c** (38 mg, 0.15 mmol), and *t*-BuOO*t*-Bu (110  $\mu\text{L}$ , 4.00 equiv) in acetonitrile **2a** (1.5 mL, 0.10 M) at  $130\text{ }^\circ\text{C}$  for 24 h. Chromatography (16% EtOAc/hexanes) afforded **3ca** in 46% yield (20 mg) as a colorless oil:  $^1\text{H}$  NMR (500 MHz,  $\text{CDCl}_3$ )  $\delta$  7.54 (d,  $J = 7.5$  Hz, 1H), 7.43 (td,  $J = 7.5, 1.0$  Hz, 1H), 7.29-7.26 (m, 2H), 7.22 (t,  $J = 7.0$  Hz, 1H), 6.97 (d,  $J = 8.0$  Hz, 1H), 6.86 (d,  $J = 9.0$  Hz, 2H), 3.78 (s, 3H), 3.34 (d,  $J = 16.5$  Hz, 1H), 3.23 (s, 3H), 2.98 (d,  $J = 16.5$  Hz, 1H);  $^{13}\text{C}$  NMR (125 MHz,  $\text{CDCl}_3$ )  $\delta$  176.1, 159.7, 143.7, 129.8, 129.7, 128.5, 128.2, 125.4, 123.5, 116.6, 114.5, 109.1, 55.4, 52.2, 26.8, 26.7; IR (film) 2958, 2249, 1713, 1610, 1470, 1371, 1254,  $754\text{ cm}^{-1}$ ; HRMS (EI-TOF) calcd for  $\text{C}_{18}\text{H}_{16}\text{N}_2\text{O}_2$   $[\text{M}]^+$   $m/z = 292.1212$ ; found 292.1209.

### 2-(3-(4-Fluorophenyl)-1-methyl-2-oxindolin-3-yl)acetonitrile (3da)

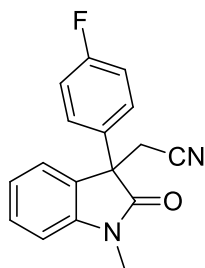

General procedure A was followed using **1d** (36 mg, 0.15 mmol), and *t*-BuOO*t*-Bu (110  $\mu$ L, 4.00 equiv) in acetonitrile **2a** (1.5 mL, 0.10 M) at 130  $^{\circ}$ C for 24 h. Chromatography (12% EtOAc/hexanes) afforded **3da** in 40% yield (17 mg) as a colorless oil:  $^1\text{H}$  NMR (500 MHz,  $\text{CDCl}_3$ )  $\delta$  7.55 (d,  $J = 7.5$  Hz, 1H), 7.45 (td,  $J = 8.0, 1.0$  Hz, 1H), 7.37-7.34 (m, 2H), 7.24 (t,  $J = 7.5$  Hz, 1H), 7.03 (t,  $J = 8.5$  Hz, 2H), 6.98 (d,  $J = 7.5$  Hz, 1H), 3.35 (d,  $J = 16.5$  Hz, 1H), 3.24 (s, 3H), 2.98 (d,  $J = 16.5$  Hz, 1H);  $^{13}\text{C}$  NMR (125 MHz,  $\text{CDCl}_3$ )  $\delta$  175.9, 163.1 (d,  $J = 247$  Hz), 143.9, 132.5 (d,  $J = 3.1$  Hz), 130.3, 129.5, 129.1 (d,  $J = 8.3$  Hz), 125.6, 123.9, 116.6, 116.3 (d,  $J = 21.6$  Hz), 109.5, 52.4, 27.2, 27.1;  $^{19}\text{F}$  NMR (376 MHz,  $\text{CDCl}_3$ )  $\delta$  -113.5; IR (film) 2925, 2250, 1713, 1612, 1471, 1371, 1235, 754  $\text{cm}^{-1}$ ; HRMS (EI-TOF) calcd for  $\text{C}_{17}\text{H}_{13}\text{FN}_2\text{O}$   $[\text{M}]^+$   $m/z = 280.1012$ ; found 280.1021.

### 2-(1-Methyl-2-oxo-3-(*m*-tolyl)indolin-3-yl)acetonitrile (**3ea**)

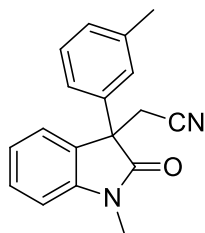

General procedure A was followed using **1e** (36 mg, 0.15 mmol), and *t*-BuOO*t*-Bu (110  $\mu$ L, 4.00 equiv) in acetonitrile **2a** (1.5 mL, 0.10 M) at 130  $^{\circ}$ C for 24 h. Chromatography (12% EtOAc/hexanes) afforded **3ea** in 47% yield (20 mg) as an amorphous white solid:  $^1\text{H}$  NMR (500 MHz,  $\text{CDCl}_3$ )  $\delta$  7.51 (d,  $J = 7.5$  Hz, 1H), 7.44 (td,  $J = 7.5, 1.0$  Hz, 1H), 7.24-7.19 (m, 2H), 7.15-7.09 (m, 3H), 6.97 (d,  $J = 8.0$  Hz, 1H), 3.36 (d,  $J = 17.0$  Hz, 1H), 3.25 (s, 3H), 3.04 (d,  $J = 17.0$  Hz, 1H), 2.32 (s, 3H);  $^{13}\text{C}$  NMR (125 MHz,  $\text{CDCl}_3$ )  $\delta$  176.0, 143.7, 138.9, 136.6, 129.7, 129.3, 128.9, 127.4, 125.3, 123.9, 123.5, 118.0, 116.6, 109.1, 52.8, 26.9, 26.5, 21.7; IR (film) 2932, 2250,

1713, 1611, 1470, 1370, 754, 732  $\text{cm}^{-1}$ ; HRMS (EI-TOF) calcd for  $\text{C}_{18}\text{H}_{16}\text{N}_2\text{O}$   $[\text{M}]^+$   $m/z = 276.1263$ ; found 276.1279.

### 2-(1,5-Dimethyl-2-oxo-3-phenylindolin-3-yl)acetonitrile (3fa)

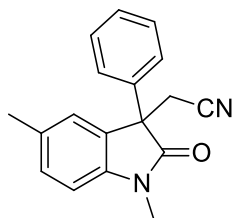

General procedure A was followed using **4f** (36 mg, 0.15 mmol), and *t*-BuOO*t*-Bu (110  $\mu\text{L}$ , 4.00 equiv) in acetonitrile **2a** (1.5 mL, 0.10 M) at 130  $^\circ\text{C}$  for 24 h. Chromatography (12% EtOAc/hexanes) afforded **3fa** in 40% yield (17 mg) as a colorless oil:  $^1\text{H}$  NMR (500 MHz,  $\text{CDCl}_3$ )  $\delta$  7.35-7.30 (m, 6H), 7.23 (d,  $J = 8.0$  Hz, 1H), 6.86 (d,  $J = 8.0$  Hz, 1H), 3.36 (d,  $J = 16.5$  Hz, 1H), 3.23 (s, 3H), 3.03 (d,  $J = 16.5$  Hz, 1H), 2.41 (s, 3H);  $^{13}\text{C}$  NMR (125 MHz,  $\text{CDCl}_3$ )  $\delta$  175.8, 141.4, 136.8, 133.2, 130.1, 129.7, 129.1, 128.4, 126.9, 126.0, 116.6, 108.8, 52.9, 26.9, 26.5, 21.4; IR (film) 2923, 2250, 1712, 1619, 1499, 1355, 734, 697  $\text{cm}^{-1}$ ; HRMS (EI-TOF) calcd for  $\text{C}_{18}\text{H}_{16}\text{N}_2\text{O}$   $[\text{M}]^+$   $m/z = 276.1263$ ; found 276.1265.

### 2-(6-Chloro-1-methyl-2-oxo-3-phenylindolin-3-yl)acetonitrile (3ga)

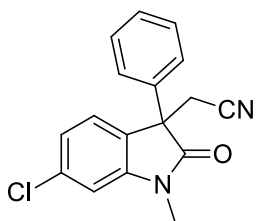

General procedure A was followed using **1g** (39 mg, 0.15 mmol), and *t*-BuOO*t*-Bu (110  $\mu\text{L}$ , 4.00 equiv) in acetonitrile **2a** (1.5 mL, 0.10 M) at 130  $^\circ\text{C}$  for 24 h. Chromatography (11% EtOAc/hexanes) afforded **3ga** in 63% yield (28 mg) as an amorphous white solid:  $^1\text{H}$  NMR (500 MHz,  $\text{CDCl}_3$ )  $\delta$  7.44 (d,  $J = 8.0$  Hz, 1H), 7.37-7.30 (m, 5H), 7.20 (dd,  $J = 8.0, 2.0$  Hz, 1H), 6.98

(d,  $J = 1.5$  Hz, 1H), 3.36 (d,  $J = 17.0$  Hz, 1H), 3.23 (s, 3H), 3.05 (d,  $J = 17.0$  Hz, 1H);  $^{13}\text{C}$  NMR (125 MHz,  $\text{CDCl}_3$ )  $\delta$  175.8, 144.9, 136.1, 135.9, 129.2, 128.8, 127.8, 126.7, 126.3, 123.4, 116.3, 109.9, 52.6, 27.0, 26.5; IR (film) 2948, 2250, 1719, 1608, 1494, 1367, 729, 695  $\text{cm}^{-1}$ ; HRMS (EI-TOF) calcd for  $\text{C}_{17}\text{H}_{13}\text{ClN}_2\text{O}$   $[\text{M}]^+$   $m/z = 296.0716$ ; found 296.0719.

### 2-(1-Benzyl-2-oxo-3-phenylindolin-3-yl)acetonitrile (3ha)

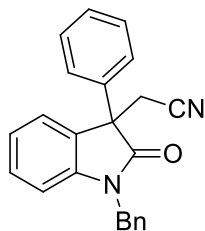

General procedure A was followed using **1h** (45 mg, 0.15 mmol), and *t*-BuOO*t*-Bu (110  $\mu\text{L}$ , 4.00 equiv) in acetonitrile **2a** (1.5 mL, 0.10 M) at 130  $^\circ\text{C}$  for 24 h. Chromatography (13% EtOAc/hexanes) afforded **3ha** in 52% yield (26 mg) as a colorless oil:  $^1\text{H}$  NMR (500 MHz,  $\text{CDCl}_3$ )  $\delta$  7.50 (d,  $J = 7.5$  Hz, 1H), 7.38-7.24 (m, 11H), 7.17 (td,  $J = 7.5, 1.0$  Hz, 1H), 6.85 (d,  $J = 8.0$  Hz, 1H), 4.96 (d,  $J = 16.0$  Hz, 1H), 4.92 (d,  $J = 16.0$  Hz, 1H), 3.44 (d,  $J = 16.5$  Hz, 1H), 3.15 (d,  $J = 16.5$  Hz, 1H);  $^{13}\text{C}$  NMR (125 MHz,  $\text{CDCl}_3$ )  $\delta$  176.1, 142.9, 136.8, 135.3, 129.7 (2C), 129.2, 129.0, 128.6, 127.9, 127.3, 126.8, 125.3, 123.6, 116.5, 110.2, 52.9, 44.4, 26.4; IR (film) 3032, 2925, 2250, 1713, 1612, 1487, 1362, 732, 696  $\text{cm}^{-1}$ ; HRMS (EI-TOF) calcd for  $\text{C}_{23}\text{H}_{18}\text{N}_2\text{O}$   $[\text{M}]^+$   $m/z = 338.1419$ ; found 338.1433.

### 2-(9-Phenyl-9H-fluoren-9-yl)acetonitrile (6aa)

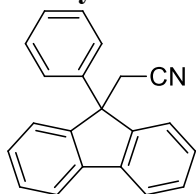

General procedure B was followed using **5a** (36 mg, 0.15 mmol), PivOH (31 mg, 0.30 mmol, 2.0 equiv), and *t*-BuOO*t*-Bu (165  $\mu\text{L}$ , 6.00 equiv) in acetonitrile (1.5 mL, 0.10 M) at 125  $^\circ\text{C}$  for 23 h.

Chromatography (4% EtOAc/hexanes) afforded **6aa** (27 mg) in 65% yield as a colorless oil:  $^1\text{H}$  NMR (500 MHz,  $\text{CDCl}_3$ )  $\delta$  7.80 (d,  $J = 7.5$  Hz, 2H), 7.43 (td,  $J = 7.5, 1.0$  Hz, 2H), 7.39 (d,  $J = 7.5$  Hz, 2H), 7.34-7.23 (m, 5H), 7.17 (d,  $J = 7.0$  Hz, 2H), 3.25 (s, 2H);  $^{13}\text{C}$  NMR (125 MHz,  $\text{CDCl}_3$ )  $\delta$  149.4, 140.9, 140.1, 129.0, 128.7, 128.3, 127.6, 126.4, 124.6, 120.7, 117.7, 55.5, 27.7; IR (film) 3061, 2926, 2250, 1698, 1449, 754, 733  $\text{cm}^{-1}$ ; HRMS (EI-TOF) calcd for  $\text{C}_{21}\text{H}_{15}\text{N}$   $[\text{M}]^+$   $m/z = 281.1204$ ; found 281.1195.

### 2-(9-(*p*-Tolyl)-9H-fluoren-9-yl)acetonitrile (**6ba**)

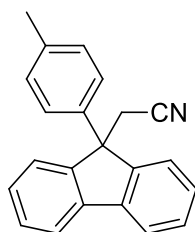

General procedure B was followed using **5b** (38.5 mg, 0.15 mmol), PivOH (31 mg, 0.30 mmol, 2.0 equiv), and *t*-BuOO*t*-Bu (165  $\mu\text{L}$ , 6.00 equiv) in acetonitrile (1.5 mL, 0.10 M) at 125  $^\circ\text{C}$  for 23 h. Chromatography (4% EtOAc/hexanes) afforded **6ba** in 61% yield (27.0 mg) as a colorless oil:  $^1\text{H}$  NMR (500 MHz,  $\text{CDCl}_3$ )  $\delta$  7.80 (d,  $J = 7.5$  Hz, 2H), 7.42 (td,  $J = 7.5, 1.0$  Hz, 2H), 7.38 (d,  $J = 7.5$  Hz, 2H), 7.31 (td,  $J = 7.5, 1.0$  Hz, 2H), 7.08 (d,  $J = 8.0$  Hz, 2H), 7.05 (d,  $J = 8.5$  Hz, 2H), 3.22 (s, 2H), 2.30 (s, 3H);  $^{13}\text{C}$  NMR (125 MHz,  $\text{CDCl}_3$ )  $\delta$  149.5, 140.1, 137.9, 137.3, 129.7, 128.6, 128.3, 126.3, 124.5, 120.6, 117.7, 55.3, 27.8, 21.1; IR (film) 3024, 2922, 2248, 1512, 1448, 748, 734  $\text{cm}^{-1}$ ; HRMS (EI-TOF) calcd for  $\text{C}_{22}\text{H}_{17}\text{N}$   $[\text{M}]^+$   $m/z = 295.1361$ ; found 295.1364.

### 2-(9-(4-Methoxyphenyl)-9H-fluoren-9-yl)acetonitrile (**6ca**)

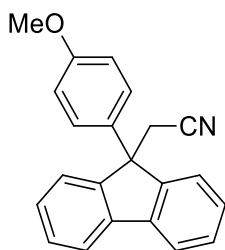



General procedure B was followed using **5c** (41 mg, 0.15 mmol), PivOH (31 mg, 0.30 mmol, 2.0 equiv), and *t*-BuOO*t*-Bu (165  $\mu$ L, 6.00 equiv) in acetonitrile (1.5 mL, 0.10 M) at 125  $^{\circ}$ C for 23 h. Chromatography (7% EtOAc/hexanes) afforded **6ca** in 55% yield (26 mg) as a colorless oil:  $^1\text{H}$  NMR (500 MHz,  $\text{CDCl}_3$ )  $\delta$  7.79 (d,  $J = 7.5$  Hz, 2H), 7.44-7.37 (m, 4H), 7.31 (td,  $J = 7.5, 1.0$  Hz, 2H), 7.09 (d,  $J = 9.0$  Hz, 2H), 6.81 (d,  $J = 9.0$  Hz, 2H), 3.77 (s, 3H), 3.21 (s, 2H);  $^{13}\text{C}$  NMR (125 MHz,  $\text{CDCl}_3$ )  $\delta$  158.9, 149.6, 140.0, 132.8, 128.6, 128.3, 127.5, 124.5, 120.6, 117.7, 114.3, 55.4, 54.9, 27.9; IR (film) 3031, 2932, 2249, 1580, 1448, 1185, 749, 735  $\text{cm}^{-1}$ ; HRMS (EI-TOF) calcd for  $\text{C}_{22}\text{H}_{17}\text{NO}$   $[\text{M}]^+$   $m/z = 311.1310$ ; found 311.1310.

### 2-(9-(4-(*tert*-Butyl)phenyl)-9H-fluoren-9-yl)acetonitrile (**6da**)

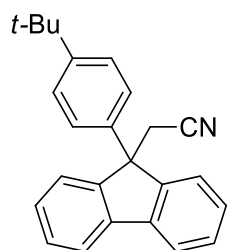

General procedure B was followed using **5d** (45 mg, 0.15 mmol), PivOH (31 mg, 0.30 mmol, 2.0 equiv), and *t*-BuOO*t*-Bu (165  $\mu$ L, 6.00 equiv) in acetonitrile (1.5 mL, 0.10 M) at 125  $^{\circ}$ C for 23 h. Chromatography (6% EtOAc/hexanes) afforded **6da** in 62% yield (31 mg) as a colorless oil:  $^1\text{H}$  NMR (500 MHz,  $\text{CDCl}_3$ )  $\delta$  7.80 (d,  $J = 7.5$  Hz, 2H), 7.44-7.39 (m, 4H), 7.33-7.26 (m, 4H), 7.09 (d,  $J = 8.5$  Hz, 2H), 3.24 (s, 2H), 1.27 (s, 9H);  $^{13}\text{C}$  NMR (125 MHz,  $\text{CDCl}_3$ )  $\delta$  150.4, 149.4, 140.1, 137.7, 128.6, 128.2, 126.0, 125.9, 124.6, 120.6, 117.7, 55.2, 34.5, 31.4, 27.8; IR (film) 3025, 2962, 2248, 1448, 758, 734  $\text{cm}^{-1}$ ; HRMS (EI-TOF) calcd for  $\text{C}_{25}\text{H}_{23}\text{N}$   $[\text{M}]^+$   $m/z = 337.1830$ ; found 337.1830.

### 2-(9-(4-Chlorophenyl)-9H-fluoren-9-yl)acetonitrile (**6ea**)

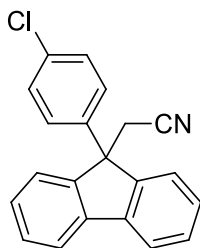

General procedure B was followed using **5e** (42 mg, 0.15 mmol), PivOH (31 mg, 0.30 mmol, 2.0 equiv), and *t*-BuOO*t*-Bu (165  $\mu$ L, 6.00 equiv) in acetonitrile (1.5 mL, 0.10 M) at 125  $^{\circ}$ C for 23 h. Chromatography (5% EtOAc/hexanes) afforded **6ea** in 55% yield (26 mg) as a colorless oil:  $^1\text{H}$  NMR (500 MHz,  $\text{CDCl}_3$ )  $\delta$  7.80 (d,  $J = 7.5$  Hz, 2H), 7.44 (td,  $J = 7.5, 1.0$  Hz, 2H), 7.37-7.30 (m, 4H), 7.25 (d,  $J = 7.5$  Hz, 2H), 7.10 (d,  $J = 8.5$  Hz, 2H), 3.20 (s, 2H);  $^{13}\text{C}$  NMR (125 MHz,  $\text{CDCl}_3$ )  $\delta$  148.9, 140.0, 139.5, 133.6, 129.2, 128.9, 128.5, 127.9, 124.4, 120.8, 117.4, 55.1, 27.7; IR (film) 3065, 2925, 2250, 1492, 1448, 1094, 758, 735  $\text{cm}^{-1}$ ; HRMS (EI-TOF) calcd for  $\text{C}_{21}\text{H}_{14}\text{ClN}$   $[\text{M}]^+$   $m/z = 315.0815$ ; found 315.0796.

### 2-(9-(4-Fluorophenyl)-9H-fluoren-9-yl)acetonitrile (**6fa**)

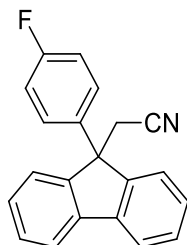

General procedure B was followed using **5f** (39 mg, 0.15 mmol), PivOH (31 mg, 0.30 mmol, 2.0 equiv), and *t*-BuOO*t*-Bu (165  $\mu$ L, 6.00 equiv) in acetonitrile (1.5 mL, 0.10 M) at 125  $^{\circ}$ C for 23 h. Chromatography (4% EtOAc/hexanes) afforded **6fa** in 45% yield (20 mg) as a colorless oil:  $^1\text{H}$  NMR (500 MHz,  $\text{CDCl}_3$ )  $\delta$  7.79 (d,  $J = 7.5$  Hz, 2H), 7.42 (td,  $J = 7.5, 1.0$  Hz, 2H), 7.37-7.34 (m, 2H), 7.30 (td,  $J = 7.5, 1.0$  Hz, 2H), 7.15-7.11 (m, 2H), 6.95 (t,  $J = 8.5$  Hz, 2H), 3.19 (s, 2H);  $^{13}\text{C}$  NMR (125 MHz,  $\text{CDCl}_3$ )  $\delta$  161.9 (d,  $J = 246$  Hz), 148.9, 139.8, 136.5 (d,  $J = 3.5$  Hz), 128.6, 128.2, 127.9 (d,  $J = 8.3$  Hz), 124.2, 120.5, 117.2, 115.6 (d,  $J = 21.4$  Hz), 54.8, 27.7;  $^{19}\text{F}$  NMR (376 MHz,

CDCl<sub>3</sub>)  $\delta$  -114.9; IR (film) 3065, 2923, 2249, 1508, 1449, 750, 734 cm<sup>-1</sup>; HRMS (EI-TOF) calcd for C<sub>21</sub>H<sub>14</sub>FN [M]<sup>+</sup> m/z = 299.1110; found 299.1115.

### 2-(9-(4-(Trifluoromethyl)phenyl)-9H-fluoren-9-yl)acetonitrile (**6ga**)

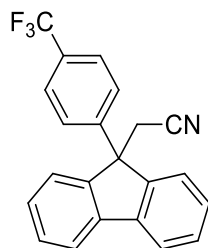

General procedure B was followed using **5g** (46 mg, 0.15 mmol), PivOH (31 mg, 0.30 mmol, 2.0 equiv), and *t*-BuOO*t*-Bu (165  $\mu$ L, 6.00 equiv) in acetonitrile (1.5 mL, 0.10 M) at 125 °C for 23 h. Chromatography (4% EtOAc/hexanes) afforded **6ga** in 46% yield (24 mg) as a white solid: <sup>1</sup>H NMR (500 MHz, CDCl<sub>3</sub>)  $\delta$  7.83 (d, *J* = 7.5 Hz, 2H), 7.54 (d, *J* = 8.5 Hz, 2H), 7.46 (td, *J* = 7.0, 1.5 Hz, 2H), 7.38-7.31 (m, 4H), 7.29 (d, *J* = 8.5 Hz, 2H), 3.25 (s, 2H); <sup>13</sup>C NMR (125 MHz, CDCl<sub>3</sub>)  $\delta$  148.5, 145.1, 139.9, 129.9 (q, *J* = 32.4 Hz), 128.9, 128.4, 126.8, 125.8 (q, *J* = 3.6 Hz), 124.9 (q, *J* = 27.1 Hz), 124.3, 120.7, 117.2, 55.3, 27.4; <sup>19</sup>F NMR (376 MHz, CDCl<sub>3</sub>)  $\delta$  -62.7; IR (film) 3066, 2926, 2249, 1618, 1328, 1119, 750, 733 cm<sup>-1</sup>; HRMS (EI-TOF) calcd for C<sub>22</sub>H<sub>14</sub>F<sub>3</sub>N [M]<sup>+</sup> m/z = 349.1078; found 349.1093.

### 2-(9-([1,1'-Biphenyl]-4-yl)-9H-fluoren-9-yl)acetonitrile (**6ha**)

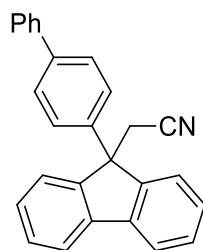

General procedure B was followed using **5h** (48 mg, 0.15 mmol), PivOH (31 mg, 0.30 mmol, 2.0 equiv), and *t*-BuOO*t*-Bu (165  $\mu$ L, 6.00 equiv) in acetonitrile (1.5 mL, 0.10 M) at 125 °C for 23 h. Chromatography (5% EtOAc/hexanes) afforded **6ha** in 47% yield (25 mg) as a white solid: <sup>1</sup>H

NMR (500 MHz, CDCl<sub>3</sub>)  $\delta$  7.80 (d,  $J$  = 7.5 Hz, 2H), 7.53-7.47 (m, 4H), 7.45-7.38 (m, 6H), 7.34-7.29 (m, 3H), 7.22 (d,  $J$  = 8.5 Hz, 2H), 3.26 (s, 2H); <sup>13</sup>C NMR (125 MHz, CDCl<sub>3</sub>)  $\delta$  149.1, 140.3, 140.2, 139.9, 137.9, 128.7, 128.5, 128.2, 127.5, 127.3, 126.9, 126.6, 124.4, 120.5, 117.4, 55.1, 27.6; IR (film) 3030, 2924, 2248, 1486, 1448, 762, 735 cm<sup>-1</sup>; HRMS (EI-TOF) calcd for C<sub>27</sub>H<sub>19</sub>N [M]<sup>+</sup>  $m/z$  = 357.1517; found 357.1502.

### 2-(9-(3-methoxyphenyl)-9H-fluoren-9-yl)acetonitrile (**6ia**)

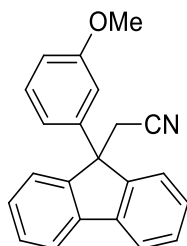

General procedure B was followed using **5i** (41 mg, 0.15 mmol), PivOH (31 mg, 0.30 mmol, 2.0 equiv), and *t*-BuOO*t*-Bu (165  $\mu$ L, 6.00 equiv) in acetonitrile (1.5 mL, 0.10 M) at 125 °C for 23 h. Chromatography (7% EtOAc/hexanes) afforded **6ia** in 51% yield (24 mg) as a colorless oil: <sup>1</sup>H NMR (500 MHz, CDCl<sub>3</sub>)  $\delta$  7.79 (d,  $J$  = 7.5 Hz, 2H), 7.44-7.39 (m, 4H), 7.31 (td,  $J$  = 7.5, 1.0 Hz, 2H), 7.22 (t,  $J$  = 8.0 Hz, 1H), 6.79 (td,  $J$  = 7.0, 1.5 Hz, 2H), 6.67 (t,  $J$  = 2.5 Hz, 1H), 3.71 (s, 3H), 3.22 (s, 2H); <sup>13</sup>C NMR (125 MHz, CDCl<sub>3</sub>)  $\delta$  159.9, 149.1, 142.6, 140.1, 129.9, 128.7, 128.3, 124.5, 120.6, 118.7, 117.6, 113.3, 112.0, 55.5, 55.3, 27.8; IR (film) 3067, 2948, 2247, 1490, 1449, 766, 734 cm<sup>-1</sup>; HRMS (EI-TOF) calcd for C<sub>22</sub>H<sub>17</sub>NO [M]<sup>+</sup>  $m/z$  = 311.1310; found 311.1298.

### 2-(9-(3-Fluorophenyl)-9H-fluoren-9-yl)acetonitrile (**5ja**)

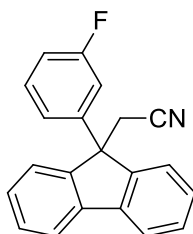

General procedure B was followed using **5j** (39 mg, 0.15 mmol), PivOH (31 mg, 0.30 mmol, 2.0 equiv), and *t*-BuOO*t*-Bu (165  $\mu$ L, 6.00 equiv) in acetonitrile (1.5 mL, 0.10 M) at 125 °C for 23 h. Chromatography (3% EtOAc/hexanes) afforded **5ja** in 61% yield (27 mg) as a colorless oil:  $^1\text{H}$  NMR (500 MHz,  $\text{CDCl}_3$ )  $\delta$  7.81 (d,  $J = 7.5$  Hz, 2H), 7.45 (td,  $J = 7.5, 1.0$  Hz, 2H), 7.39 (d,  $J = 7.5$  Hz, 2H), 7.35-7.27 (m, 3H), 7.05-7.02 (m, 1H), 6.98-6.93 (m, 1H), 6.80 (dt,  $J = 10.0, 2.5$  Hz, 1H), 3.22 (s, 2H);  $^{13}\text{C}$  NMR (125 MHz,  $\text{CDCl}_3$ )  $\delta$  163.1 (d,  $J = 245$  Hz), 148.7, 143.6 (d,  $J = 6.9$  Hz), 140.1, 130.5 (d,  $J = 8.4$  Hz), 128.9, 128.5, 124.5, 121.9 (d,  $J = 2.8$  Hz), 120.8, 117.3, 114.6 (d,  $J = 21.0$  Hz), 113.8 (d,  $J = 22.8$  Hz), 55.3 (d,  $J = 1.8$  Hz), 28.8 (d,  $J = 269$  Hz);  $^{19}\text{F}$  NMR (376 MHz,  $\text{CDCl}_3$ )  $\delta$  -111.7; IR (film) 2923, 2852, 2249, 1588, 1449, 764, 748  $\text{cm}^{-1}$ ; HRMS (EI-TOF) calcd for  $\text{C}_{21}\text{H}_{14}\text{FN}$   $[\text{M}]^+$   $m/z = 299.1110$ ; found 299.1118.

#### 2-(9-(Benzo[d][1,3]dioxol-5-yl)-9H-fluoren-9-yl)acetonitrile (**6ka**)

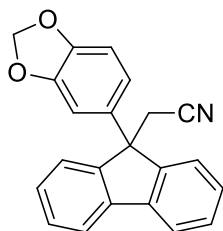

General procedure B was followed using **5k** (43 mg, 0.15 mmol), PivOH (31 mg, 0.30 mmol, 2.0 equiv), and *t*-BuOO*t*-Bu (165  $\mu$ L, 6.00 equiv) in acetonitrile (1.5 mL, 0.10 M) at 125 °C for 23 h. Chromatography (7% EtOAc/hexanes) afforded **6ka** in 34% yield (17 mg) as a colorless oil:  $^1\text{H}$  NMR (500 MHz,  $\text{CDCl}_3$ )  $\delta$  7.78 (d,  $J = 8.0$  Hz, 2H), 7.44-7.38 (m, 4H), 7.31 (td,  $J = 8.5, 1.0$  Hz, 2H), 6.82 (dd,  $J = 8.5, 2.0$  Hz, 1H), 6.75 (d,  $J = 8.5$  Hz, 1H), 6.43 (d,  $J = 2.0$  Hz, 1H), 5.89 (s, 2H), 3.17 (s, 2H);  $^{13}\text{C}$  NMR (125 MHz,  $\text{CDCl}_3$ )  $\delta$  149.3, 148.3, 147.1, 139.9, 134.7, 128.7, 128.3, 124.4, 120.7, 119.3, 117.6, 108.4, 107.4, 101.3, 55.3, 27.9; IR (film) 3062, 2919, 2249, 1488, 1448, 1240, 1040, 752, 735  $\text{cm}^{-1}$ ; HRMS (EI-TOF) calcd for  $\text{C}_{22}\text{H}_{15}\text{NO}_2$   $[\text{M}]^+$   $m/z = 325.1103$ ; found 325.1122.

#### 2-(9-(Naphthalen-1-yl)-9H-fluoren-9-yl)acetonitrile (**6la**)

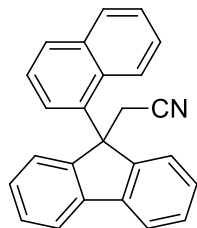

General procedure B was followed using **5l** (44 mg, 0.15 mmol), PivOH (31 mg, 0.30 mmol, 2.0 equiv), and *t*-BuOO*t*-Bu (165  $\mu$ L, 6.00 equiv) in acetonitrile (1.5 mL, 0.10 M) at 125  $^{\circ}$ C for 23 h. Chromatography (5% EtOAc/hexanes) afforded **6la** in 36% yield (18 mg) as an amorphous white solid:  $^1\text{H}$  NMR (500 MHz,  $\text{CDCl}_3$ )  $\delta$  7.99 (d,  $J = 7.5$  Hz, 1H), 7.95 (d,  $J = 7.5$  Hz, 2H), 7.86 (d,  $J = 8.5$  Hz, 1H), 7.75 (d,  $J = 8.0$  Hz, 1H), 7.63 (t,  $J = 7.5$  Hz, 1H), 7.46 (t,  $J = 7.5$  Hz, 2H), 7.22 (t,  $J = 7.5$  Hz, 3H), 7.14 (d,  $J = 7.5$  Hz, 2H), 6.84 (t,  $J = 8.5$  Hz, 1H), 6.57 (d,  $J = 9.0$  Hz, 1H), 3.14 (s, 2H);  $^{13}\text{C}$  NMR (125 MHz,  $\text{CDCl}_3$ )  $\delta$  150.5, 139.5, 134.8, 130.8, 129.7, 128.9, 128.7, 128.5, 127.6, 127.5, 125.9, 125.8, 125.5, 125.3, 124.9, 124.1, 121.3, 56.3, 31.9; IR (film) 3051, 2923, 2249, 1448, 775, 736  $\text{cm}^{-1}$ ; HRMS (EI-TOF) calcd for  $\text{C}_{25}\text{H}_{17}\text{N}$   $[\text{M}]^+$   $m/z = 331.1361$ ; found 331.1367.

### 2-(9-(4-(9H-Carbazol-9-yl)phenyl)-9H-fluoren-9-yl)acetonitrile (**5ma**)

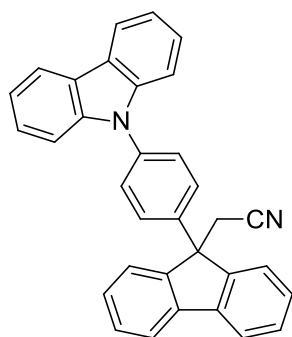

General procedure B was followed using **5m** (61 mg, 0.15 mmol), PivOH (31 mg, 0.30 mmol, 2.0 equiv), and *t*-BuOO*t*-Bu (165  $\mu$ L, 6.00 equiv) in acetonitrile (1.5 mL, 0.10 M) at 125  $^{\circ}$ C for 23 h. Chromatography (6% EtOAc/hexanes) afforded **5ma** in 49% yield (33 mg) an amorphous white

solid:  $^1\text{H}$  NMR (500 MHz,  $\text{CDCl}_3$ )  $\delta$  8.12 (d,  $J = 8.0$  Hz, 2H), 7.85 (d,  $J = 7.5$  Hz, 2H), 7.53-7.47 (m, 6H), 7.43-7.36 (m, 8H), 7.30-7.26 (m, 2H), 3.32 (s, 2H);  $^{13}\text{C}$  NMR (125 MHz,  $\text{CDCl}_3$ )  $\delta$  149.1, 140.8, 140.2, 140.1, 137.2, 128.9, 128.5, 127.9, 127.4, 126.1, 124.6, 123.6, 120.8, 120.4, 120.2, 117.5, 109.9, 55.4, 27.9; IR (film) 3061, 2925, 2249, 1514, 1451, 1229, 750, 735  $\text{cm}^{-1}$ ; HRMS (EI-TOF) calcd for  $\text{C}_{33}\text{H}_{22}\text{N}_2$   $[\text{M}]^+$   $m/z = 446.1783$ ; found 446.1793.

### 2-(9-Butyl-9H-fluoren-9-yl)acetonitrile (6na)

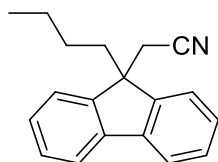

General procedure B was followed using **5n** (33 mg, 0.15 mmol), PivOH (31 mg, 0.30 mmol, 2.0 equiv), and *t*-BuOO*t*-Bu (165  $\mu\text{L}$ , 6.00 equiv) in acetonitrile (1.5 mL, 0.10 M) at 125  $^\circ\text{C}$  for 23 h. Chromatography (4% EtOAc/hexanes) afforded **6na** in 51% yield (20 mg) as a colorless oil:  $^1\text{H}$  NMR (500 MHz,  $\text{CDCl}_3$ )  $\delta$  7.74 (d,  $J = 7.5$  Hz, 2H), 7.54 (d,  $J = 7.5$  Hz, 2H), 7.41 (td,  $J = 7.5$ , 1.0 Hz, 2H), 7.35 (td,  $J = 7.5$ , 1.5 Hz, 2H), 2.72 (s, 2H), 2.23-2.19 (m, 2H), 1.14 (q,  $J = 7.5$  Hz, 2H), 0.70 (t,  $J = 7.5$  Hz, 3H), 0.67-0.60 (m, 2H);  $^{13}\text{C}$  NMR (125 MHz,  $\text{CDCl}_3$ )  $\delta$  147.5, 140.5, 128.4, 127.9, 123.1, 120.4, 117.9, 51.0, 37.2, 29.3, 26.0, 22.8, 13.8; IR (film) 2956, 2930, 2860, 2247, 1449, 761, 736  $\text{cm}^{-1}$ ; HRMS (EI-TOF) calcd for  $\text{C}_{19}\text{H}_{19}\text{N}$   $[\text{M}]^+$   $m/z = 261.1517$ ; found 261.1542.

### 2-(2-Fluoro-9-phenyl-9H-fluoren-9-yl)acetonitrile (6oa)

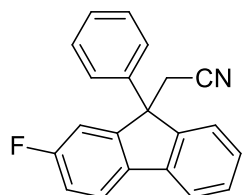

General procedure B was followed using **5o** (39 mg, 0.15 mmol), PivOH (31 mg, 0.30 mmol, 2.0 equiv), and *t*-BuOO*t*-Bu (165  $\mu\text{L}$ , 6.00 equiv) in acetonitrile (1.5 mL, 0.10 M) at 125  $^\circ\text{C}$  for 23 h.

Chromatography (4% EtOAc/hexanes) afforded **60a** in 34% yield (15 mg) as a colorless oil:  $^1\text{H}$  NMR (500 MHz,  $\text{CDCl}_3$ )  $\delta$  7.77-7.73 (m, 2H), 7.43 (t,  $J = 7.5$  Hz, 1H), 7.36 (d,  $J = 7.5$  Hz, 1H), 7.32-7.26 (m, 4H), 7.17-7.11 (m, 3H), 7.07 (dd,  $J = 8.5, 2.5$  Hz, 1H), 3.25 (s, 2H);  $^{13}\text{C}$  NMR (125 MHz,  $\text{CDCl}_3$ )  $\delta$  163.0 (d,  $J = 246$  Hz), 151.5 (d,  $J = 7.6$  Hz), 149.3, 140.3, 139.3, 136.2, 129.1, 128.9, 128.0, 127.8, 126.3, 124.5, 121.8 (d,  $J = 8.8$  Hz), 120.4, 117.2, 116.0 (d,  $J = 23.0$  Hz), 112.1 (d,  $J = 23.3$  Hz), 55.6, 27.6;  $^{19}\text{F}$  NMR (376 MHz,  $\text{CDCl}_3$ )  $\delta$  -112.4; IR (film) 3052, 2248, 1592, 1454, 1265, 757, 732  $\text{cm}^{-1}$ ; HRMS (EI-TOF) calcd for  $\text{C}_{21}\text{H}_{14}\text{FN}$   $[\text{M}]^+$   $m/z = 299.1110$ ; found 299.1120.

### 2-(9-(4-Methoxyphenyl)-2-nitro-9H-fluoren-9-yl)acetonitrile (**6pa**)

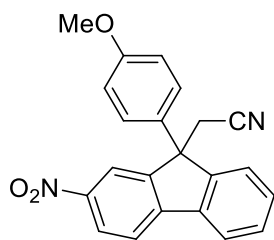

General procedure B was followed using **5p** (48 mg, 0.15 mmol), PivOH (31 mg, 0.30 mmol, 2.0 equiv), and *t*-BuOO*t*-Bu (165  $\mu\text{L}$ , 6.00 equiv) in acetonitrile (1.5 mL, 0.10 M) at 125  $^\circ\text{C}$  for 23 h. Chromatography (12% EtOAc/hexanes) afforded **6pa** in 55% yield (29 mg) an amorphous white solid:  $^1\text{H}$  NMR (500 MHz,  $\text{CDCl}_3$ )  $\delta$  8.33 (dd,  $J = 8.0, 2.0$  Hz, 1H), 8.16 (d,  $J = 1.0$  Hz, 1H), 7.92-7.88 (m, 2H), 7.54-7.45 (m, 3H), 7.06 (d,  $J = 9.0$  Hz, 2H), 6.83 (d,  $J = 9.0$  Hz, 2H), 3.78 (s, 3H), 3.42 (d,  $J = 16.5$  Hz, 1H), 3.25 (d,  $J = 16.5$  Hz, 1H);  $^{13}\text{C}$  NMR (125 MHz,  $\text{CDCl}_3$ )  $\delta$  159.5, 150.8, 150.7, 147.8, 146.4, 137.9, 131.1, 130.5, 129.3, 127.4, 124.9, 124.8, 122.1, 120.9, 119.9, 116.7, 114.8, 55.4, 55.4, 27.7; IR (film) 3062, 2250, 1592, 1454, 1265, 757, 732  $\text{cm}^{-1}$ ; HRMS (EI-TOF) calcd for  $\text{C}_{22}\text{H}_{16}\text{N}_2\text{O}_3$   $[\text{M}]^+$   $m/z = 356.1161$ ; found 356.1176.

### 2-(2,7-Dibromo-9-(4-methoxyphenyl)-9H-fluoren-9-yl)acetonitrile (**6qa**)



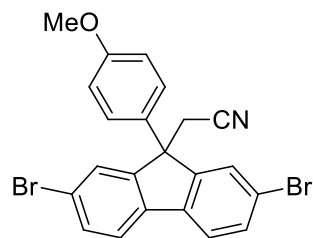

General procedure B was followed using **5q** (64 mg, 0.15 mmol), PivOH (31 mg, 0.30 mmol, 2.0 equiv), and *t*-BuOO*t*-Bu (165  $\mu$ L, 6.00 equiv) in acetonitrile (1.5 mL, 0.10 M) at 125  $^{\circ}$ C for 23 h. Chromatography (5% EtOAc/hexanes) afforded **6qa** in 64% yield (45 mg) as an amorphous white solid:  $^1\text{H}$  NMR (500 MHz,  $\text{CDCl}_3$ )  $\delta$  7.62 (d,  $J$  = 8.0 Hz, 2H), 7.55 (dd,  $J$  = 8.0, 1.5 Hz, 2H), 7.46 (d,  $J$  = 1.5 Hz, 2H), 7.02 (d,  $J$  = 9.0 Hz, 2H), 6.84 (d,  $J$  = 9.0 Hz, 2H), 3.79 (s, 3H), 3.23 (s, 2H);  $^{13}\text{C}$  NMR (125 MHz,  $\text{CDCl}_3$ )  $\delta$  159.4, 151.2, 138.1, 132.2, 131.2, 127.8, 127.4, 122.5, 122.1, 116.8, 114.7, 55.4, 55.2, 27.7; IR (film) 2931, 2836, 2249, 1512, 1253, 735  $\text{cm}^{-1}$ ; HRMS (EI-TOF) calcd for  $\text{C}_{22}\text{H}_{15}\text{Br}_2\text{NO}$   $[\text{M}]^+$   $m/z$  = 466.9520; found 466.9534.

### 2-(9-Phenyl-9H-xanthen-9-yl)acetonitrile (**6ra**)

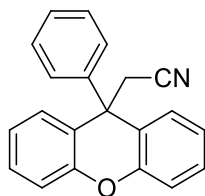

General procedure B was followed using **5r** (39 mg, 0.15 mmol), PivOH (31 mg, 0.30 mmol, 2.0 equiv), and *t*-BuOO*t*-Bu (165  $\mu$ L, 6.00 equiv) in acetonitrile (1.5 mL, 0.10 M) at 125  $^{\circ}$ C for 23 h. Chromatography (6% EtOAc/hexanes) afforded **6ra** in 20% yield (8.9 mg) as a colorless oil:  $^1\text{H}$  NMR (500 MHz,  $\text{CDCl}_3$ )  $\delta$  7.38 (t,  $J$  = 7.5 Hz, 2H), 7.34-7.26 (m, 5H), 7.19 (dd,  $J$  = 8.0, 1.0 Hz, 2H), 7.01-6.97 (m, 2H), 6.84 (dd,  $J$  = 8.0, 1.5 Hz, 2H), 3.22 (s, 2H);  $^{13}\text{C}$  NMR (125 MHz,  $\text{CDCl}_3$ )  $\delta$  150.9, 144.9, 129.2, 129.1, 128.7, 128.6, 127.4, 125.8, 123.7, 117.2, 116.9, 45.8, 33.1; IR (film)

3051, 3025, 2249, 1600, 1479, 1443, 1276, 1255, 753, 699  $\text{cm}^{-1}$ ; HRMS (EI-TOF) calcd for  $\text{C}_{21}\text{H}_{15}\text{NO}$   $[\text{M}]^+$   $m/z = 297.1154$ ; found 297.1140.

### 2-(9-Phenyl-9H-fluoren-9-yl)propanenitrile (**6ab**)

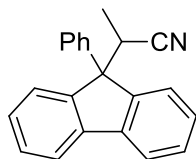

General procedure B was followed using **5a** (36 mg, 0.15 mmol), PivOH (31 mg, 0.30 mmol, 2.0 equiv), and *t*-BuOO*t*-Bu (165  $\mu\text{L}$ , 6.00 equiv) in propionitrile **2b** (1.5 mL, 0.10 M) at 125  $^{\circ}\text{C}$  for 23 h. Chromatography (4% EtOAc/hexanes) afforded **6ab** in 66% yield (29 mg) as an amorphous white solid:  $^1\text{H}$  NMR (500 MHz,  $\text{CDCl}_3$ )  $\delta$  7.80 (d,  $J = 8.0$  Hz, 1H), 7.75-7.71 (m, 2H), 7.49 (dd,  $J = 7.5, 1.0$  Hz, 1H), 7.40 (dd,  $J = 7.5, 1.5$  Hz, 1H), 7.35 (dd,  $J = 7.5, 1.5$  Hz, 1H), 7.31-7.18 (m, 7H), 4.00 (q,  $J = 7.0$  Hz, 1H), 0.78 (d,  $J = 7.0$  Hz, 3H);  $^{13}\text{C}$  NMR (125 MHz,  $\text{CDCl}_3$ )  $\delta$  148.2, 146.6, 141.9, 141.5, 140.5, 128.9, 128.8, 128.4, 128.3, 128.2, 127.6, 126.6, 125.8, 123.7, 121.9, 120.4, 120.3, 59.8, 32.9, 13.4; IR (film) 3061, 2940, 2239, 1450, 754, 732, 697  $\text{cm}^{-1}$ ; HRMS (EI-TOF) calcd for  $\text{C}_{22}\text{H}_{17}\text{N}$   $[\text{M}]^+$   $m/z = 295.1361$ ; found 295.1363.

### 2-(9-Phenyl-9H-fluoren-9-yl)butanenitrile (**6ac**)

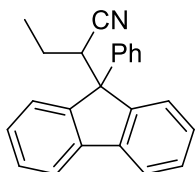

General procedure B was followed using **5a** (36 mg, 0.15 mmol), PivOH (31 mg, 0.30 mmol, 2.0 equiv), and *t*-BuOO*t*-Bu (165  $\mu\text{L}$ , 6.00 equiv) in butyronitrile **2c** (1.5 mL, 0.10 M) at 125  $^{\circ}\text{C}$  for 23 h. Chromatography (4% EtOAc/hexanes) afforded **6ac** in 75% yield (35 mg) as an amorphous white solid:  $^1\text{H}$  NMR (500 MHz,  $\text{CDCl}_3$ )  $\delta$  7.80 (d,  $J = 8.0$  Hz, 1H), 7.73 (dd,  $J = 8.0, 3.5$  Hz, 2H),

7.48 (t,  $J = 7.5$  Hz, 1H), 7.41-7.33 (m, 2H), 7.30-7.20 (m, 7H), 3.74 (t,  $J = 3.5$  Hz, 1H), 1.05-0.92 (m, 5H);  $^{13}\text{C}$  NMR (125 MHz,  $\text{CDCl}_3$ )  $\delta$  148.5, 147.1, 141.7, 140.4, 128.9, 128.7, 128.4, 128.3, 128.2, 127.5, 126.5, 125.7, 123.7, 120.9, 120.4, 120.3, 119.8, 59.7, 41.7, 20.9, 12.4; IR (film) 3061, 2969, 2240, 1450, 747, 734, 697  $\text{cm}^{-1}$ ; HRMS (EI-TOF) calcd for  $\text{C}_{23}\text{H}_{19}\text{N}$   $[\text{M}]^+$   $m/z = 309.1517$ ; found 309.1523.

### 2-(9-Phenyl-9H-fluoren-9-yl)pentanenitrile (6ad)

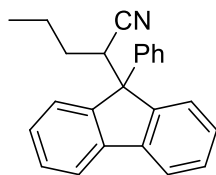

General procedure B was followed using **5a** (36 mg, 0.15 mmol), PivOH (31 mg, 0.30 mmol, 2.0 equiv), and *t*-BuOO*t*-Bu (165  $\mu\text{L}$ , 6.00 equiv) in pentanenitrile **2d** (1.5 mL, 0.10 M) at 125  $^\circ\text{C}$  for 23 h. Chromatography (5% EtOAc/hexanes) afforded **6ad** in 72% yield (35 mg) as an amorphous white solid:  $^1\text{H}$  NMR (500 MHz,  $\text{CDCl}_3$ )  $\delta$  7.80 (d,  $J = 7.5$  Hz, 1H), 7.74 (dd,  $J = 8.0, 4.5$  Hz, 2H), 7.49 (t,  $J = 7.0$  Hz, 1H), 7.42-7.33 (m, 2H), 7.30-7.21 (m, 7H), 3.85 (dd,  $J = 11.5, 3.5$  Hz, 1H), 1.58-1.50 (m, 1H), 1.35-1.27 (m, 1H), 1.09-0.98 (m, 1H), 0.87-0.80 (m, 1H), 0.75 (t,  $J = 7.5$  Hz, 3H);  $^{13}\text{C}$  NMR (125 MHz,  $\text{CDCl}_3$ )  $\delta$  148.4, 147.1, 141.7, 141.6, 140.4, 128.9, 128.7, 128.4, 128.3, 128.1, 127.5, 126.6, 125.7, 123.7, 121.2, 120.4, 120.3, 59.6, 39.4, 29.2, 21.0, 13.5; IR (film) 3060, 2960, 2245, 1450, 755, 733, 697  $\text{cm}^{-1}$ ; HRMS (EI-TOF) calcd for  $\text{C}_{24}\text{H}_{21}\text{N}$   $[\text{M}]^+$   $m/z = 323.1674$ ; found 323.1685.

### 2-Methoxy-2-(9-phenyl-9H-fluoren-9-yl)acetonitrile (6ae)

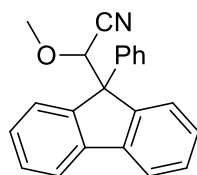

General procedure B was followed using **5a** (36 mg, 0.15 mmol), PivOH (31 mg, 0.30 mmol, 2.0 equiv), and *t*-BuOO*t*-Bu (165  $\mu$ L, 6.00 equiv) in 2-methoxyacetonitrile **2e** (1.5 mL, 0.10 M) at 125  $^{\circ}$ C for 23 h. Chromatography (6% EtOAc/hexanes) afforded **6ae** in 42% yield (20 mg) as an amorphous white solid:  $^1\text{H}$  NMR (500 MHz,  $\text{CDCl}_3$ )  $\delta$  7.82 (d,  $J = 7.6$  Hz, 1H), 7.80 (d,  $J = 7.6$  Hz, 1H), 7.57 (d,  $J = 7.5$  Hz, 1H), 7.47 (td,  $J = 7.0, 1.0$  Hz, 1H), 7.42 (td,  $J = 7.0, 1.0$  Hz, 1H), 7.37 (d,  $J = 7.5$  Hz, 1H), 7.33 (td,  $J = 8.0, 1.0$  Hz, 1H), 7.29-7.20 (m, 6H), 4.80 (s, 1H), 3.55 (s, 3H);  $^{13}\text{C}$  NMR (125 MHz,  $\text{CDCl}_3$ )  $\delta$  146.9, 146.4, 141.4, 140.8, 139.8, 129.0, 128.9, 128.8, 128.0, 127.9, 127.5, 127.1, 126.9, 125.5, 120.6, 120.4, 116.5, 76.5, 61.1, 59.1; IR (film) 3061, 2930, 2250, 1450, 1099, 756, 736  $\text{cm}^{-1}$ ; HRMS (EI-TOF) calcd for  $\text{C}_{22}\text{H}_{17}\text{NO}$   $[\text{M}]^+$   $m/z = 311.1310$ ; found 311.1310 (masses identical).

### 2-Methyl-2-(9-phenyl-9H-fluoren-9-yl)propanenitrile (**6af**)

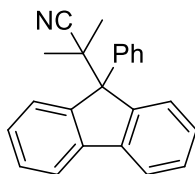

General procedure B was followed using **5a** (36 mg, 0.15 mmol), PivOH (31 mg, 0.30 mmol, 2.0 equiv), and *t*-BuOO*t*-Bu (165  $\mu$ L, 6.00 equiv) in isobutyronitrile **2f** (1.5 mL, 0.10 M) at 125  $^{\circ}$ C for 23 h. Chromatography (4% EtOAc/hexanes) afforded **6af** in 42% yield (20 mg) as a colorless oil:  $^1\text{H}$  NMR (500 MHz,  $\text{CDCl}_3$ )  $\delta$  7.76 (d,  $J = 7.5$  Hz, 2H), 7.59-7.55 (m, 4H), 7.42 (t,  $J = 7.5$  Hz, 2H), 7.32-7.20 (m, 5H), 1.27 (s, 6H);  $^{13}\text{C}$  NMR (125 MHz,  $\text{CDCl}_3$ )  $\delta$  147.9, 141.4, 140.7, 128.6, 128.5, 128.1, 127.7, 127.1, 126.5, 126.4, 120.1, 63.0, 38.2, 24.7; IR (film) 3060, 2229, 1448, 744, 728  $\text{cm}^{-1}$ ; HRMS (EI-TOF) calcd for  $\text{C}_{23}\text{H}_{19}\text{N}$   $[\text{M}]^+$   $m/z = 309.1517$ ; found 309.1529.

### 1-(9-Phenyl-9H-fluoren-9-yl)cyclohexanecarbonitrile (**6ag**)

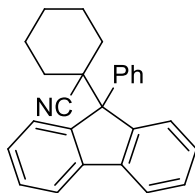

General procedure B was followed using **5a** (36 mg, 0.15 mmol), PivOH (31 mg, 0.30 mmol, 2.0 equiv), and *t*-BuOO*t*-Bu (165  $\mu$ L, 6.00 equiv) in cyclohexanecarbonitrile **2g** (1.5 mL, 0.10 M) at 125  $^{\circ}$ C for 23 h. Chromatography (4% EtOAc/hexanes) afforded **6ag** in 61% yield (32 mg) as an amorphous white solid:  $^1\text{H}$  NMR (500 MHz,  $\text{CDCl}_3$ )  $\delta$  7.75 (d,  $J = 7.5$  Hz, 2H), 7.61-7.58 (m, 4H), 7.41 (t,  $J = 7.5$  Hz, 2H), 7.30 (td,  $J = 7.5, 1.0$  Hz, 2H), 7.27-7.18 (m, 3H), 1.85-1.39 (m, 7H), 1.30-1.25 (m, 2H), 0.97-0.88 (m, 1H);  $^{13}\text{C}$  NMR (125 MHz,  $\text{CDCl}_3$ )  $\delta$  148.1, 141.6, 140.4, 128.6, 128.4, 128.3, 127.6, 127.1, 126.9, 123.7, 119.9, 63.7, 45.9, 31.3, 25.1, 22.9; IR (film) 3058, 2937, 2227, 1449, 743, 699  $\text{cm}^{-1}$ ; HRMS (EI-TOF) calcd for  $\text{C}_{26}\text{H}_{23}\text{N}$   $[\text{M}]^+$   $m/z = 349.1830$ ; found 349.1831.

### 1.5 Derivatization of Product 3aa

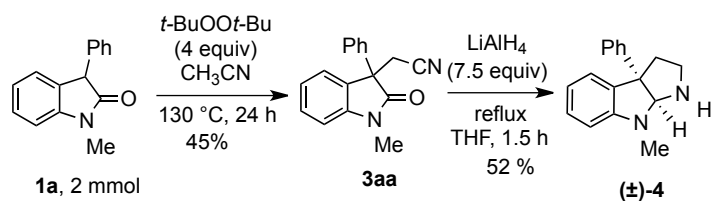

**Large scale cyanomethylation and derivatization to 8-methyl-3a-phenyl-1,2,3,3a,8,8a-hexahydropyrrolo[2,3-b]indole (4).** Oxindole **1a** (446 mg, 2.00 mmol) was submitted to the General procedure A. Purification by chromatography (100:12 hexane/EtOAc) afforded compound **3aa** in 45% yield (236 mg) as a brown solid. To a precooled (5  $^{\circ}$ C) stirred suspension of  $\text{LiAlH}_4$  (256 mg, 6.75 mmol) in anhydrous THF (10 mL) and under argon atmosphere was added the oxindole **3aa** (236 mg, 0.900 mmol) in THF (10 mL), and the mixture was heated at

reflux for 1.5 h. After cooling, the reaction mixture in an ice/water bath, the reaction was quenched by adding, in sequence, EtOAc (10 mL) and water (5 mL). The solids were removed by filtration and washed with EtOAc (2 × 10 mL). The combined organic phases were washed with brine, dried, and concentrated under reduced pressure. The resulting pyrroloindoline was purified by chromatography on silica gel (100:1 CH<sub>2</sub>Cl<sub>2</sub>/MeOH) affording compound **4** in 52% yield (117 mg) as a colorless oil: <sup>1</sup>H NMR (500 MHz, CDCl<sub>3</sub>) δ 7.35-7.28 (m, 4H), 7.20 (t, *J* = 7.0 Hz, 1H), 7.09 (t, *J* = 7.5 Hz, 1H), 6.89 (d, *J* = 7.0 Hz, 1H), 6.60 (t, *J* = 7.5 Hz, 1H), 6.39 (d, *J* = 8.0 Hz, 1H), 4.94 (s, 1H), 3.24-3.19 (m, 1H), 2.91 (s, 3H), 2.79-2.72 (m, 1H), 2.53-2.47 (m, 1H), 2.42-2.37 (m, 1H), 2.03 (s, 1H); <sup>13</sup>C NMR (125 MHz, CDCl<sub>3</sub>) δ 151.3, 146.2, 134.2, 128.4, 128.1, 126.3, 126.2, 124.2, 116.8, 105.1, 92.9, 61.3, 46.8, 41.8, 31.3; IR (film) 2933, 2875, 1603, 1492, 1296, 738, 699 cm<sup>-1</sup>; HRMS (EI-TOF) calcd for C<sub>17</sub>H<sub>18</sub>N<sub>2</sub> [M]<sup>+</sup> *m/z* = 250.1470; found 250.1482.

## References

- (1) Heaney, H.; Cardona, F.; Goti, A.; Frederick, A. L. **2013**. Hydrogen Peroxide–Urea. e-EROS Encyclopedia of Reagents for Organic Synthesis.
- (2) (a) Trost, B. M.; Masters, J. T.; Burns, A. C. Palladium-Catalyzed Asymmetric Allylic Alkylation of 3-Aryloxindoles with Allylidene Dipivalate: A Useful Enol Pivalate Product. *Angew. Chem., Int. Ed.* **2013**, *52*, 2260. (b) Trost, B. M.; Xie, J.; Sieber, J. D. The Palladium Catalyzed Asymmetric Addition of Oxindoles and Allenes: An Atom-Economical Versatile Method for the Construction of Chiral Indole Alkaloids. *J. Am. Chem. Soc.* **2011**, *133*, 20611.
- (3) (a) Shen, X.; Gu, N. N.; Liu, P.; Mao, X. W.; Xie, J. W.; Liu, Y.; Hen, L.; Dai, B. A Simple and Efficient Synthesis of 9-Arylfluorenes via Metal-Free Reductive Coupling of Arylboronic Acids and N-Tosylhydrazones in situ. *RSC Adv.* **2015**, *5*, 63726. (b) Vougioukalakis, G. C.; Roubelakis, M. M.; Orfanopoulos, M. Radical Reactivity of Aza[60]fullerene: Preparation of Monoadducts and Limitations. *J. Org. Chem.* **2010**, *75*, 4124.
- (4) Sazepin, C. C.; Wang, Q.; Sammis, G. M.; Zhu, J. P. Copper-Catalyzed Intermolecular Carboetherification of Unactivated Alkenes by Alkyl Nitriles and Alcohols. *Angew. Chem. Int. Ed.* **2015**, *54*, 5443.
- (5) Frenette, M.; Aliaga, C.; Font-Sanchis, E.; Scaiano, J. C. Bond Dissociation Energies for Radical-Dimers Derived from Highly Stabilized Carbon-Centered Radicals *Org. Lett.* **2004**, *6*, 2579-2582.
- (6) Hong, G.; Nahide, P. D.; Neelam, U. K.; Amadeo, P.; Vijeta, A.; Curto, J. M.; Hendrick, C. E.; VanGelder, K. F.; Kozlowski, M. C. Palladium-Catalyzed Chemoselective Activation of sp<sup>3</sup> vs sp<sup>2</sup> C–H Bonds: Oxidative Coupling To Form Quaternary Centers *ACS Catal.* **2019**, *9*, 3716.

# Copies of $^1\text{H}$ NMR, $^{13}\text{C}$ NMR and $^{19}\text{F}$ NMR

**3aa**  $^1\text{H}$  NMR (500 MHz,  $\text{CDCl}_3$ ),  $^{13}\text{C}$  NMR (125 MHz,  $\text{CDCl}_3$ )

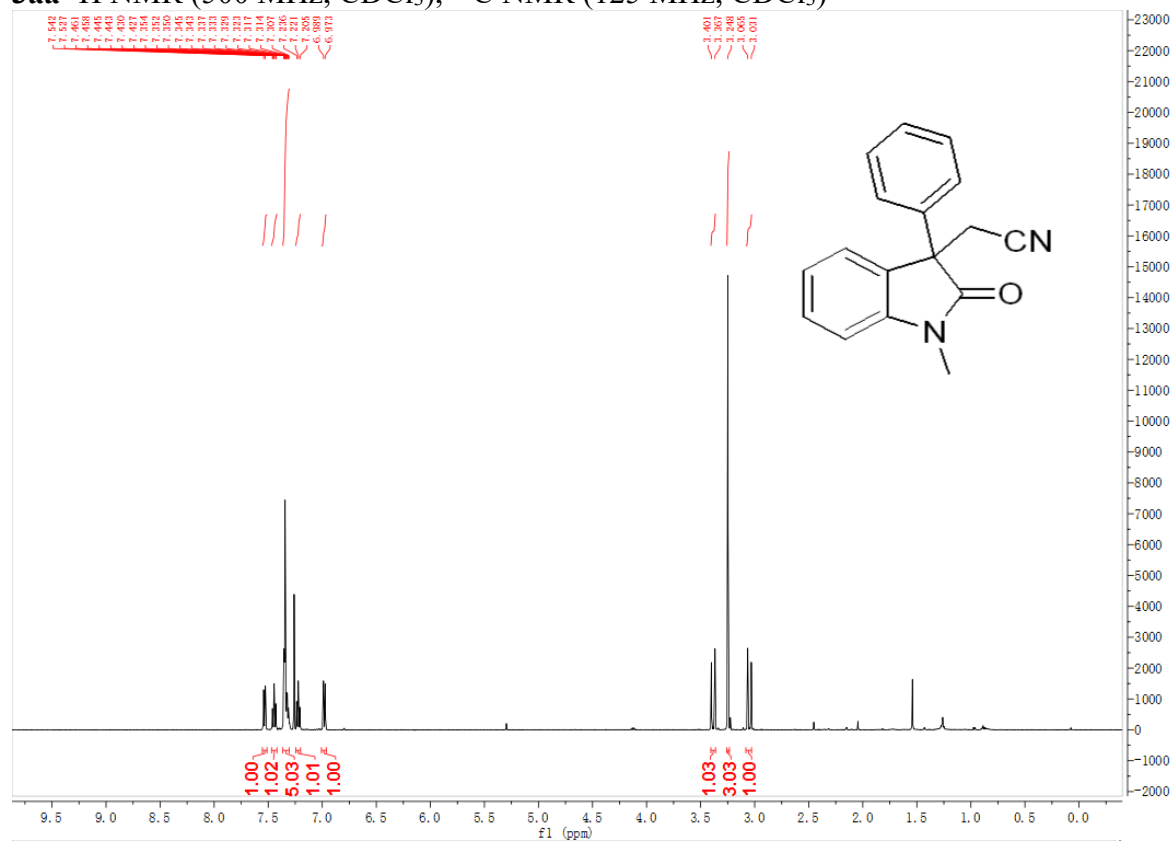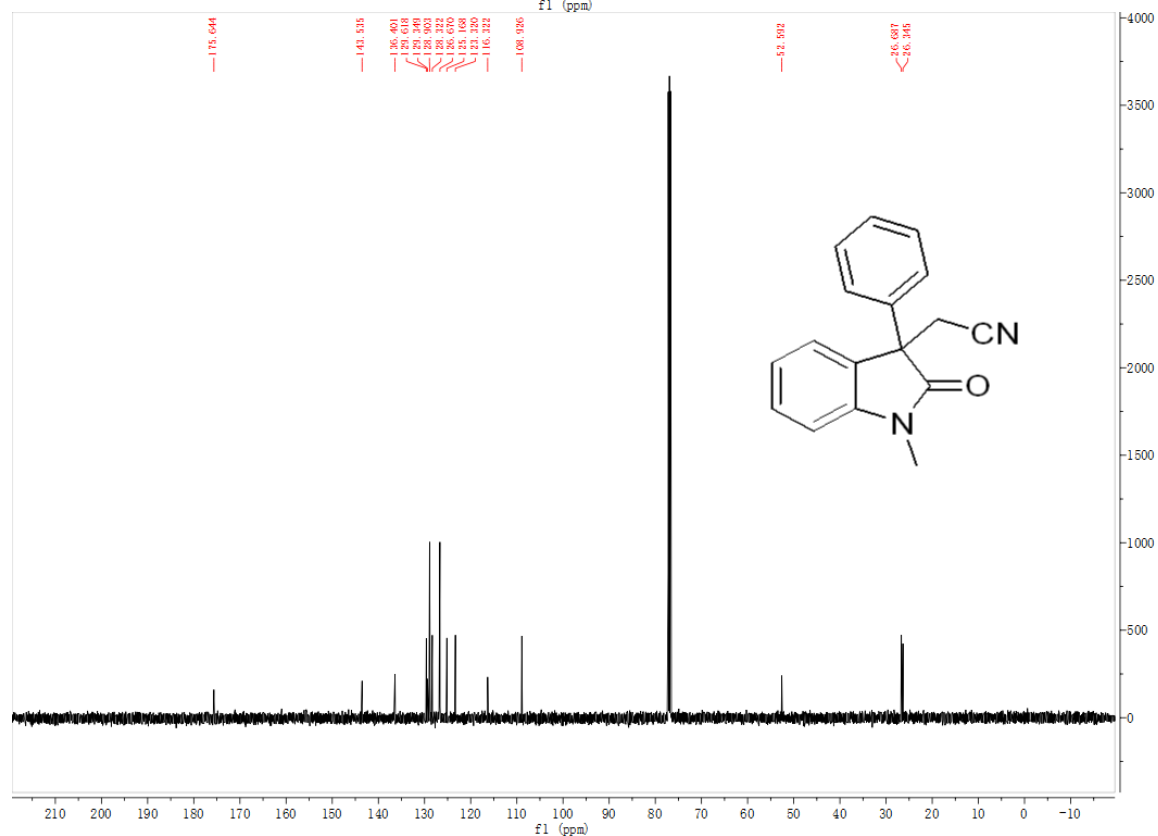

**3ba**  $^1\text{H}$  NMR (500 MHz,  $\text{CDCl}_3$ ),  $^{13}\text{C}$  NMR (125 MHz,  $\text{CDCl}_3$ )

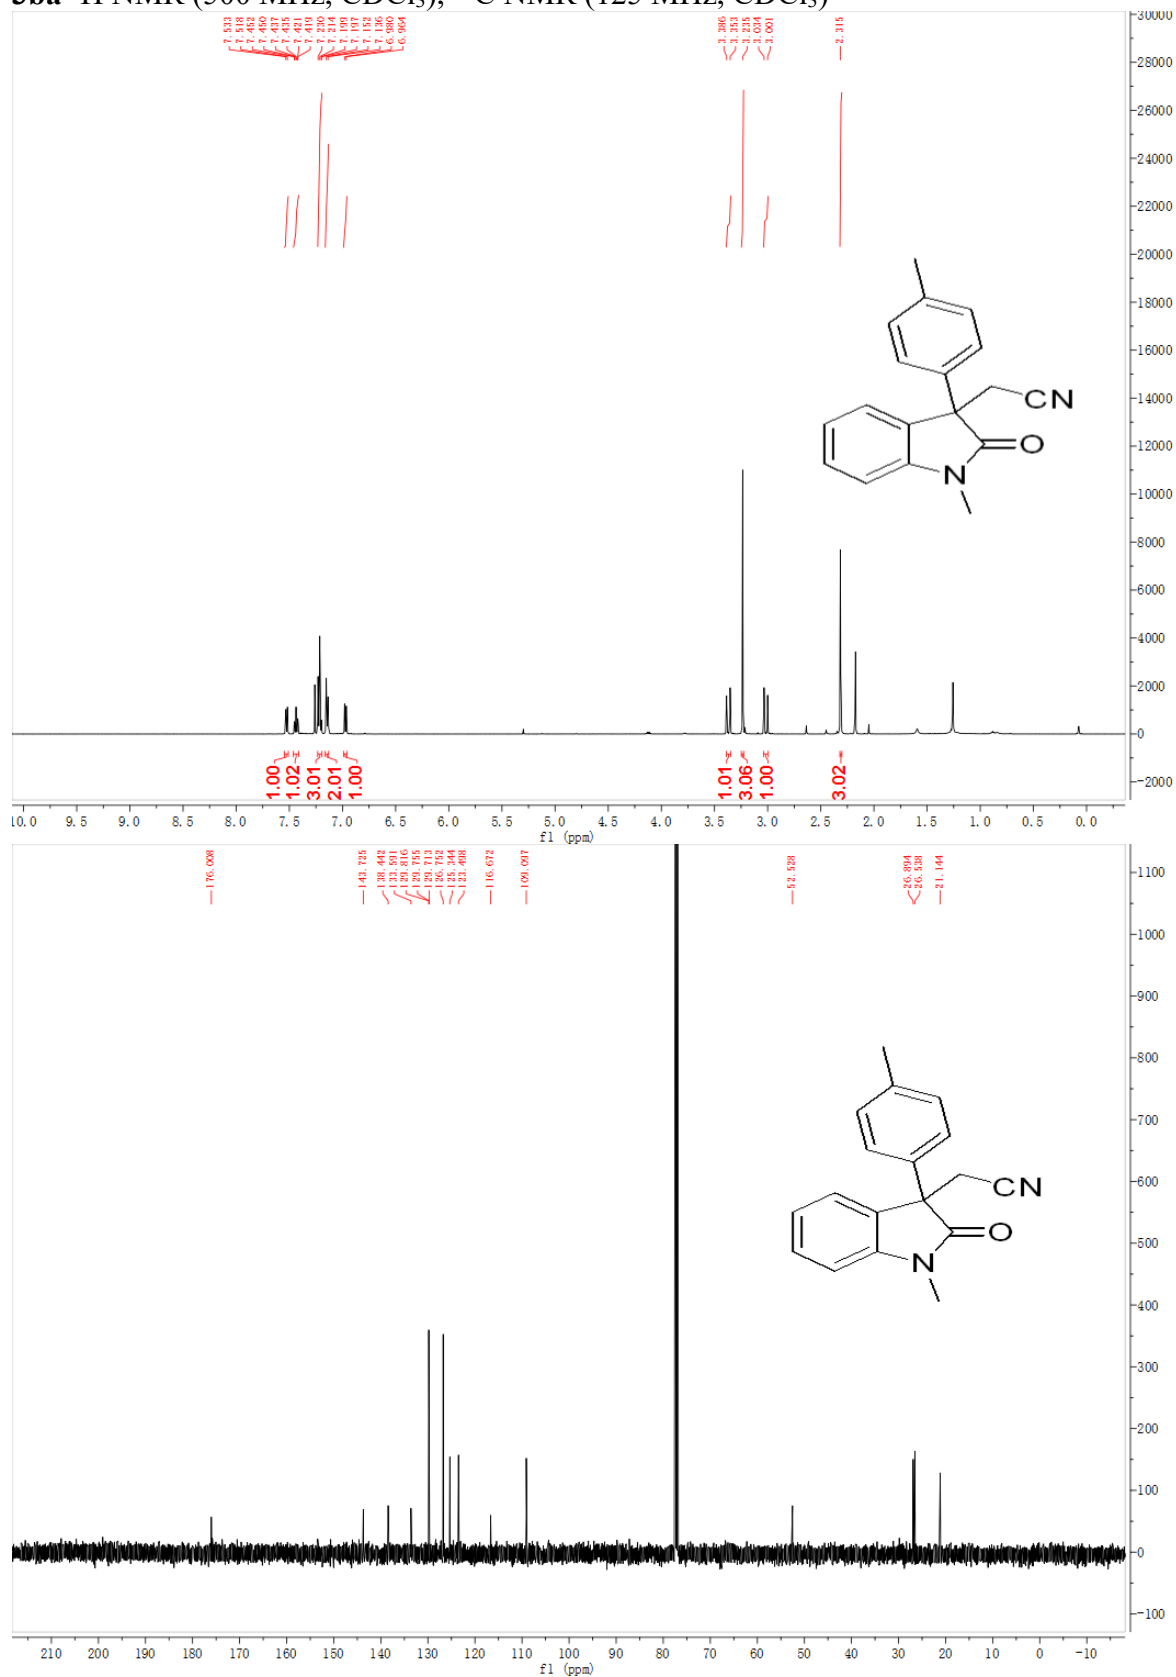



**3ca**  $^1\text{H}$  NMR (500 MHz,  $\text{CDCl}_3$ ),  $^{13}\text{C}$  NMR (125 MHz,  $\text{CDCl}_3$ )

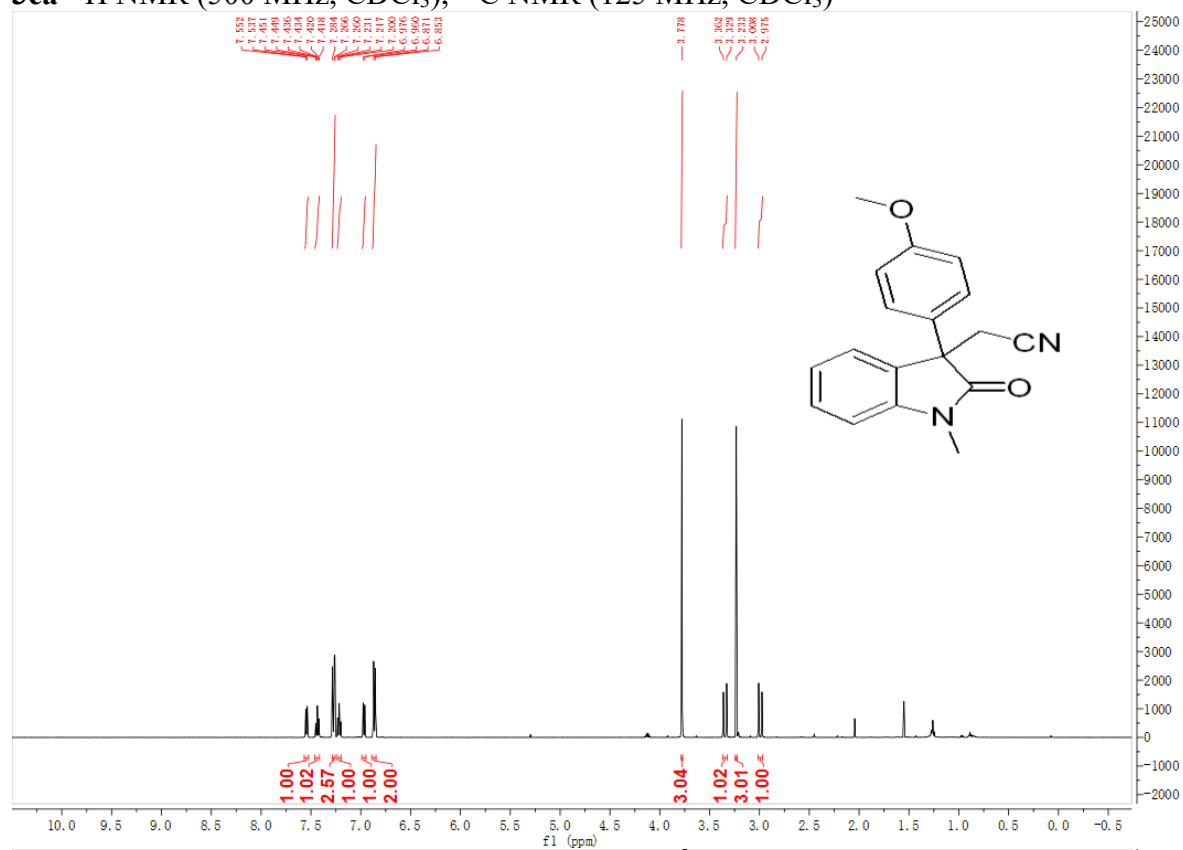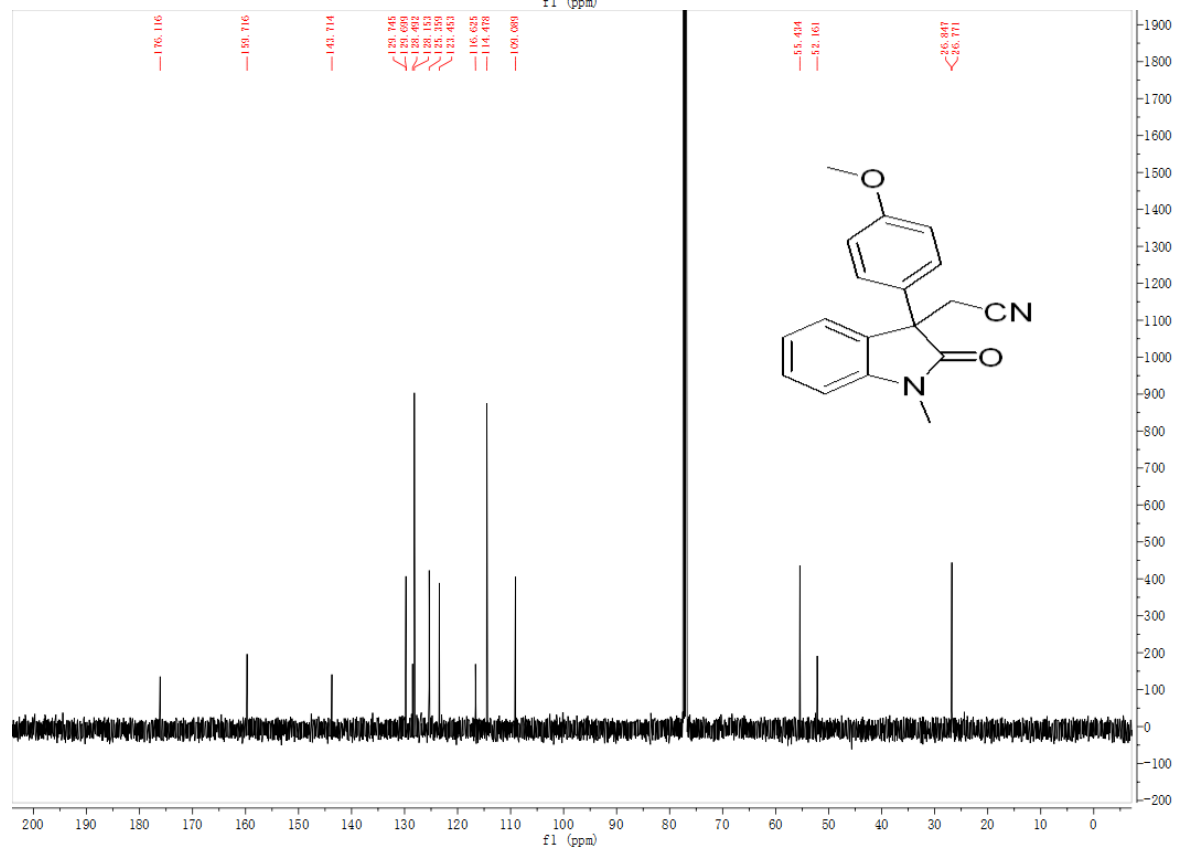

**3da**  $^1\text{H}$  NMR (500 MHz,  $\text{CDCl}_3$ ),  $^{13}\text{C}$  NMR (125 MHz,  $\text{CDCl}_3$ ),  $^{19}\text{F}$  NMR (376 MHz,  $\text{CDCl}_3$ )

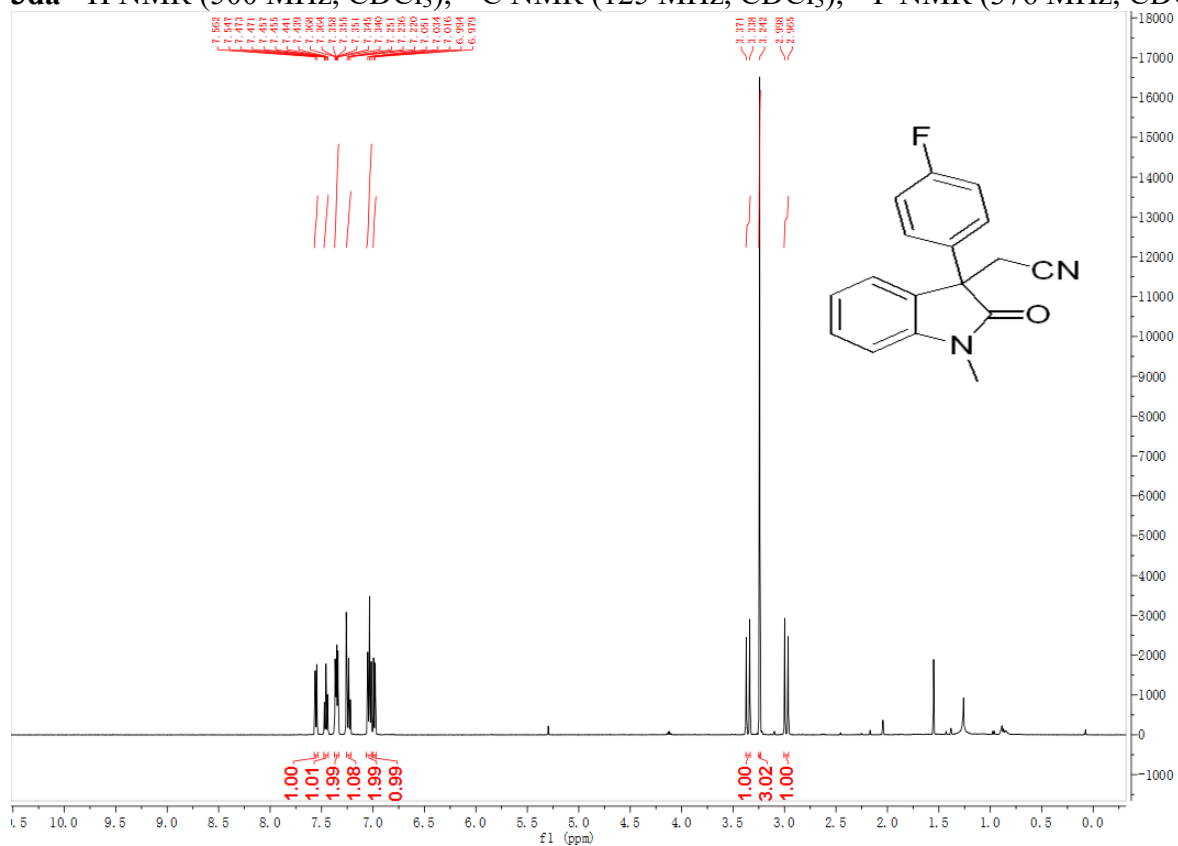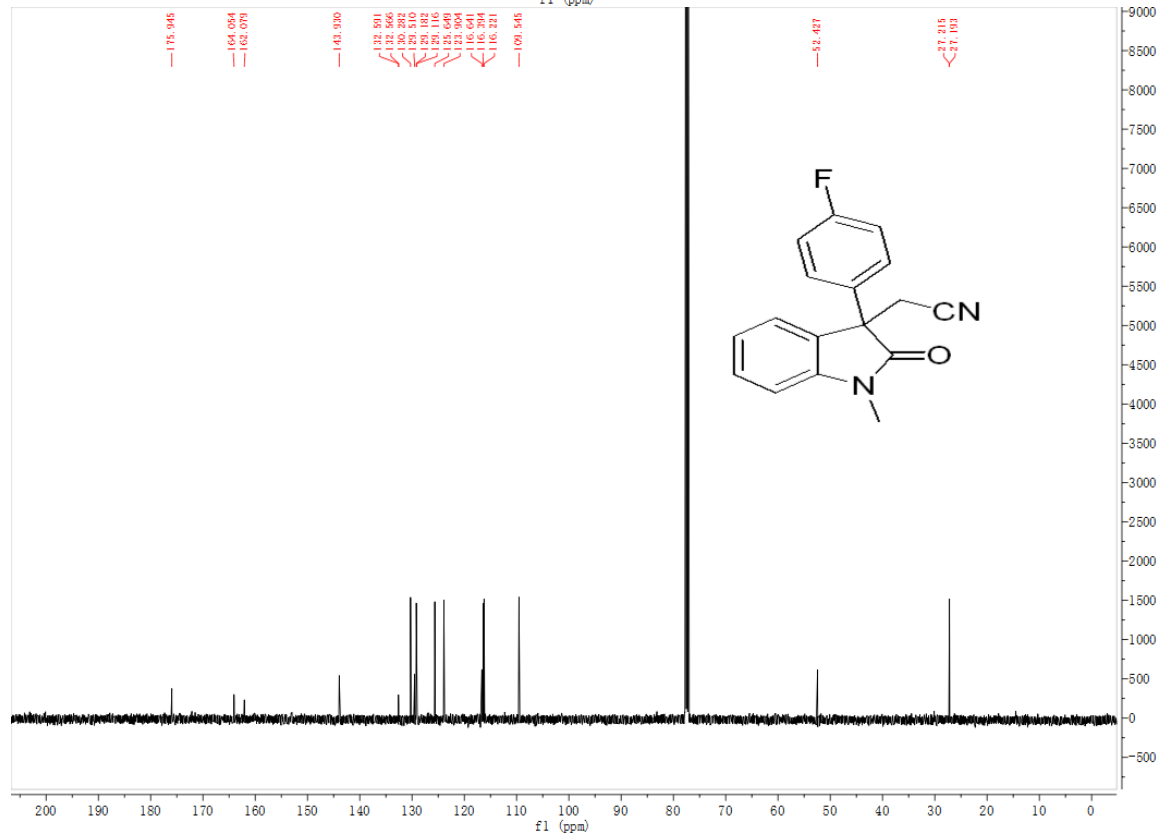

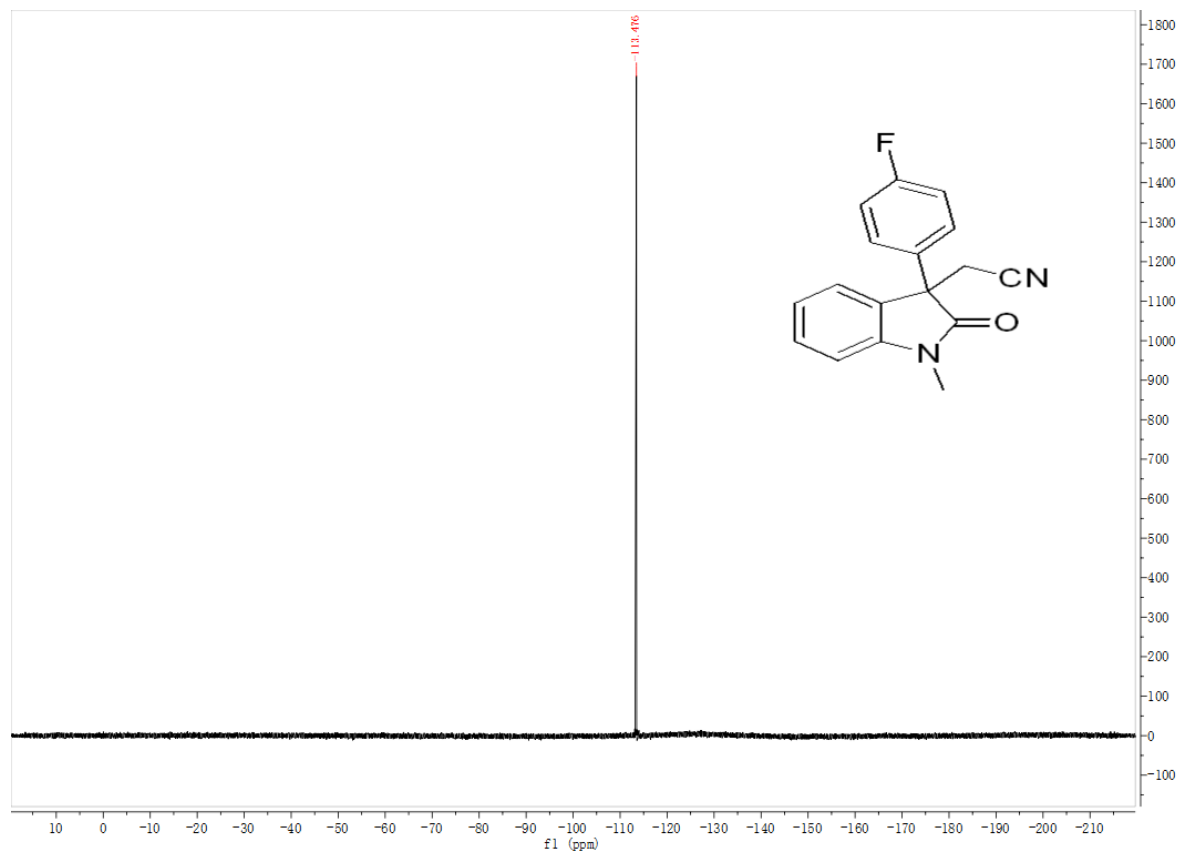

**3ea**  $^1\text{H}$  NMR (500 MHz,  $\text{CDCl}_3$ ),  $^{13}\text{C}$  NMR (125 MHz,  $\text{CDCl}_3$ )

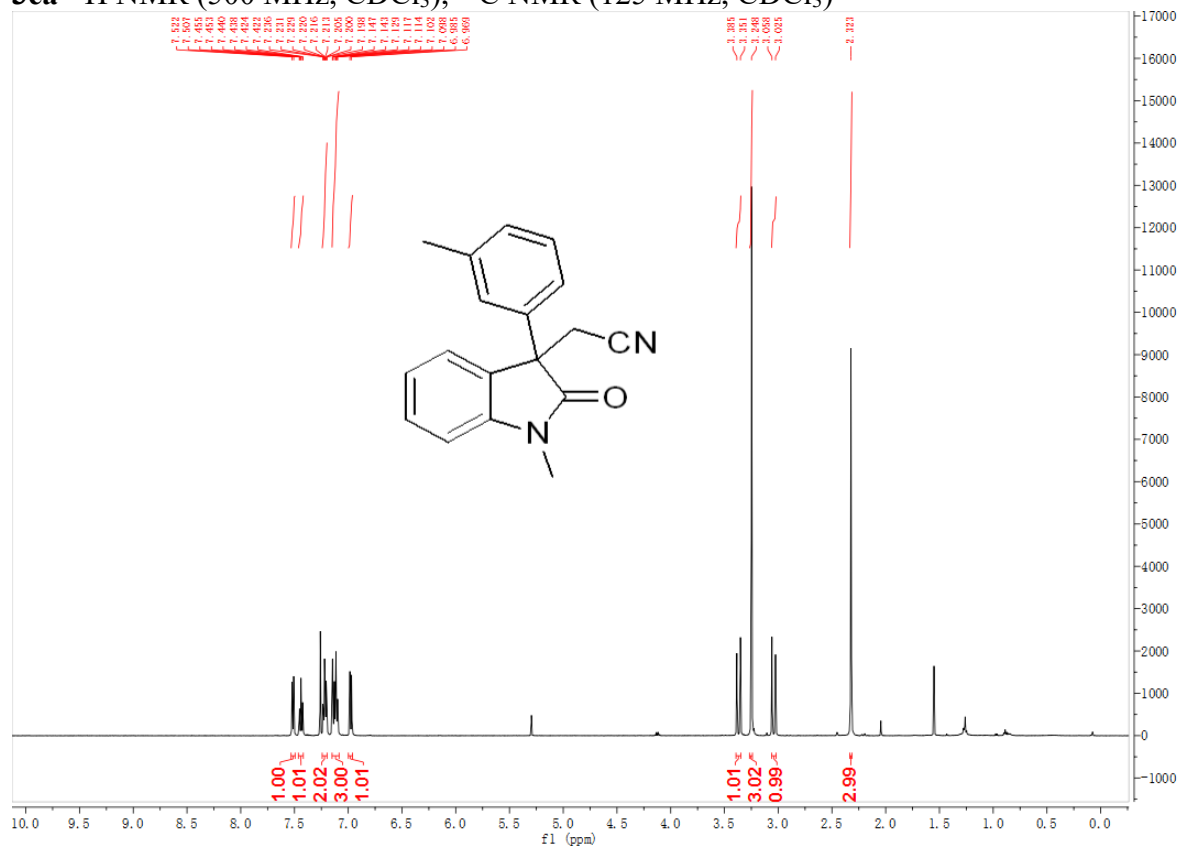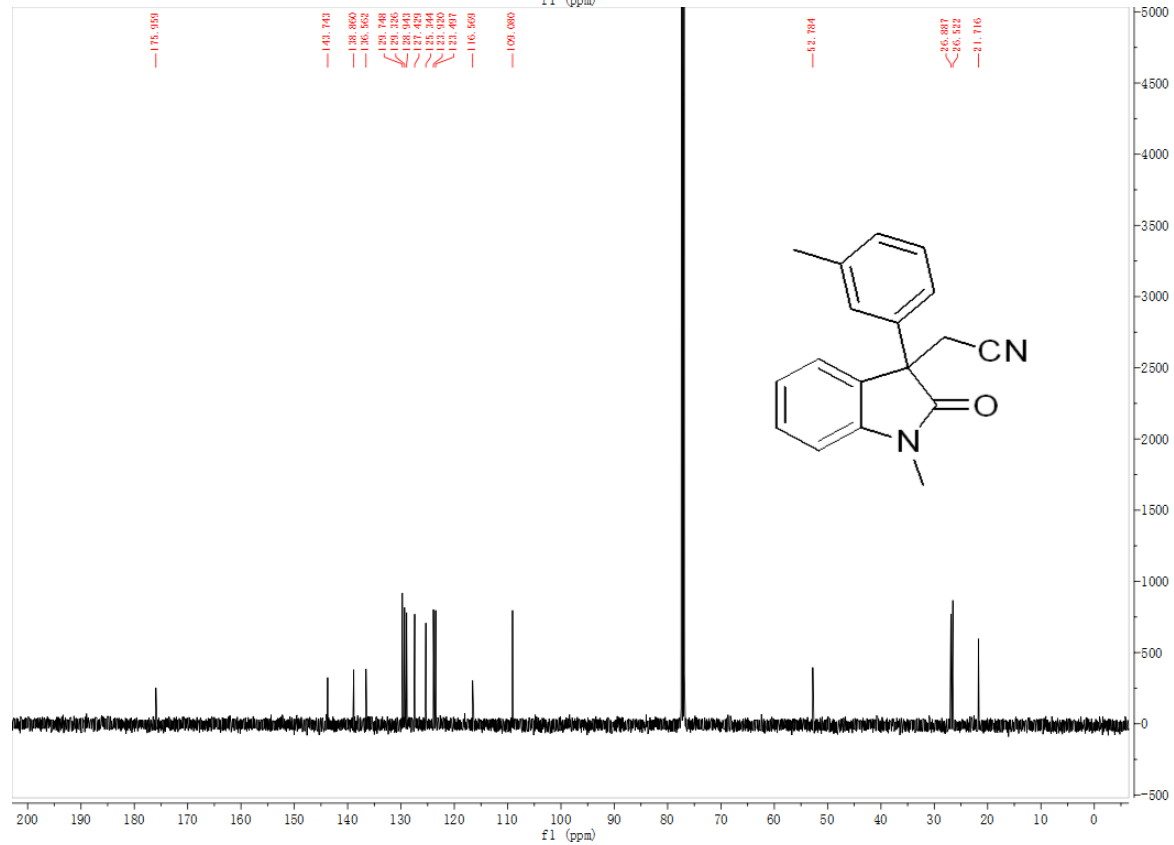

**3fa**  $^1\text{H}$  NMR (500 MHz,  $\text{CDCl}_3$ ),  $^{13}\text{C}$  NMR (125 MHz,  $\text{CDCl}_3$ )

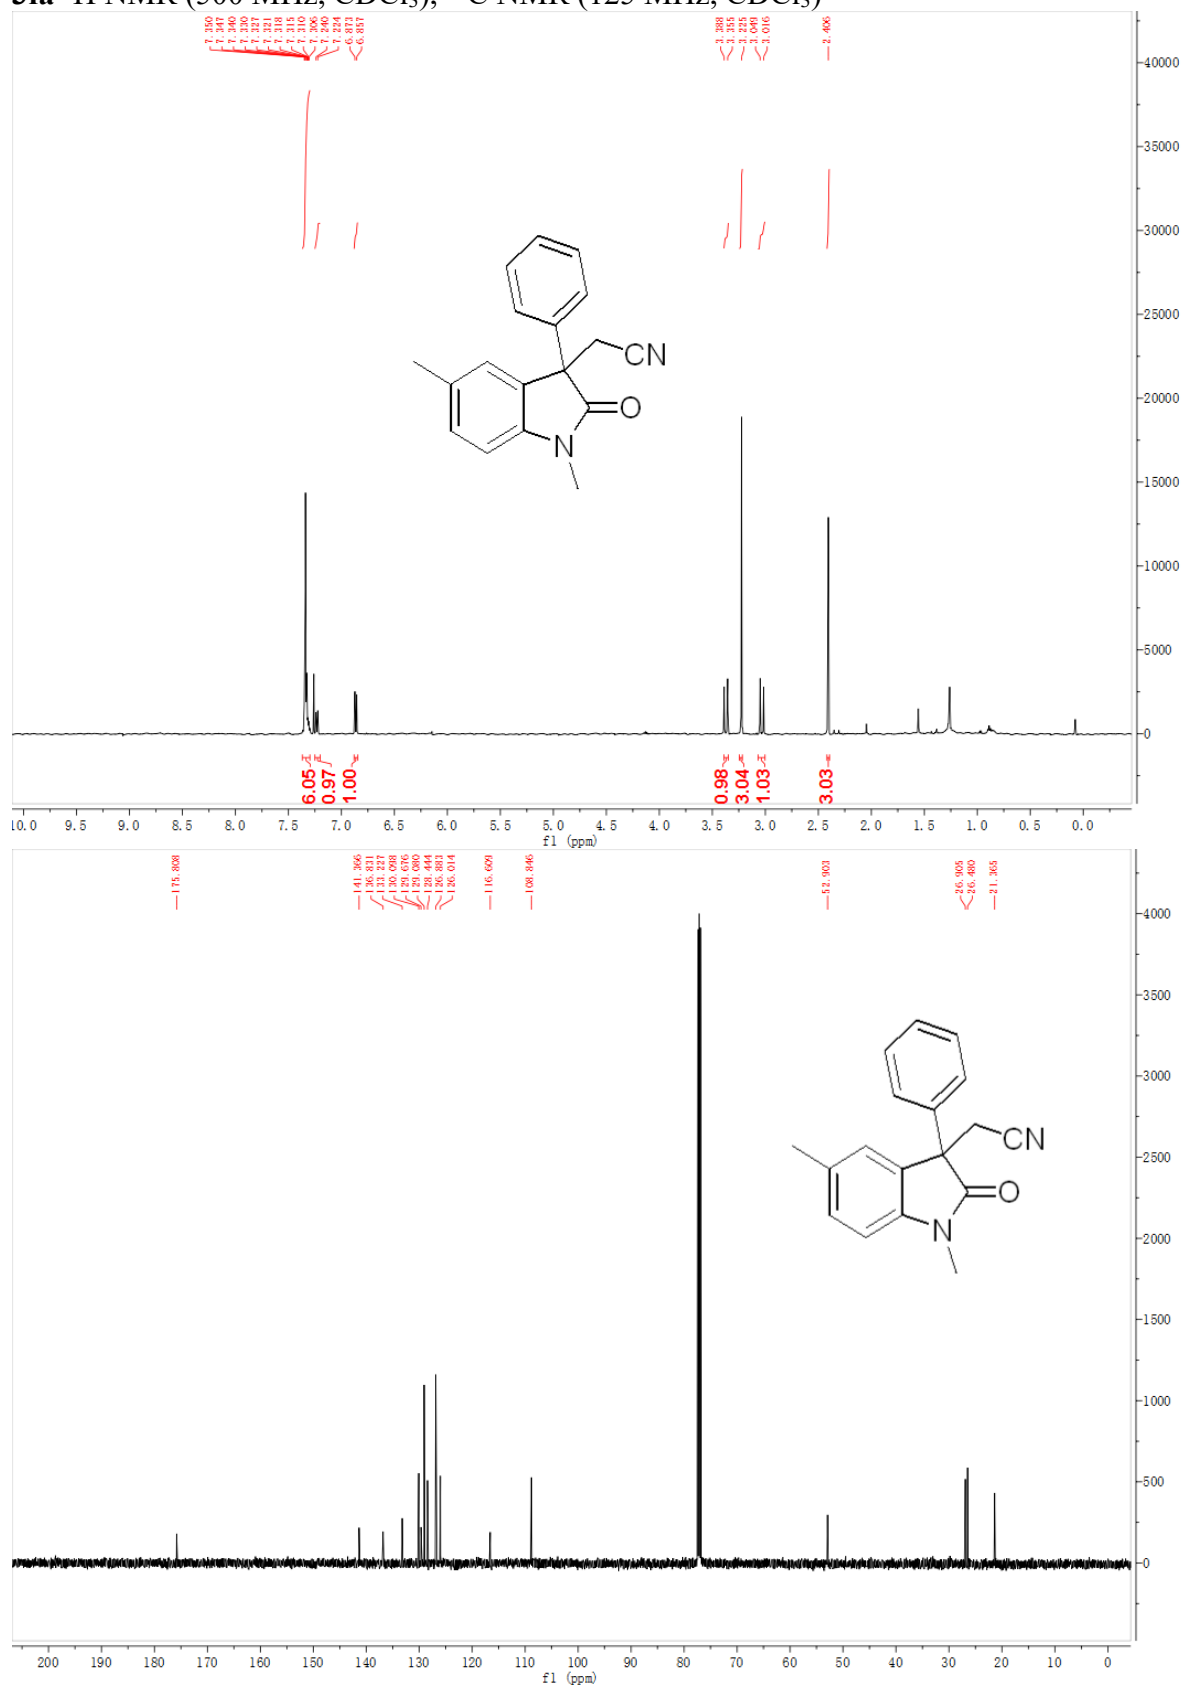

**3ga**  $^1\text{H}$  NMR (500 MHz,  $\text{CDCl}_3$ ),  $^{13}\text{C}$  NMR (125 MHz,  $\text{CDCl}_3$ )

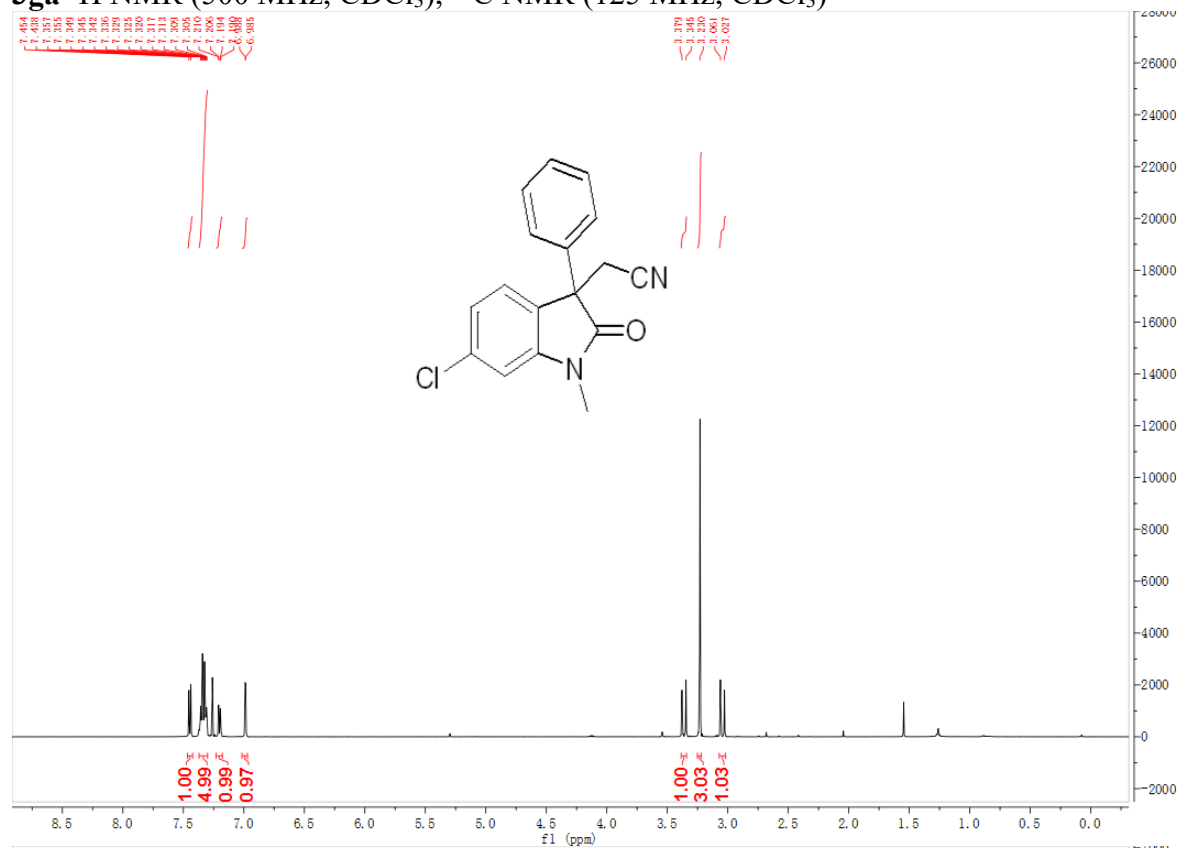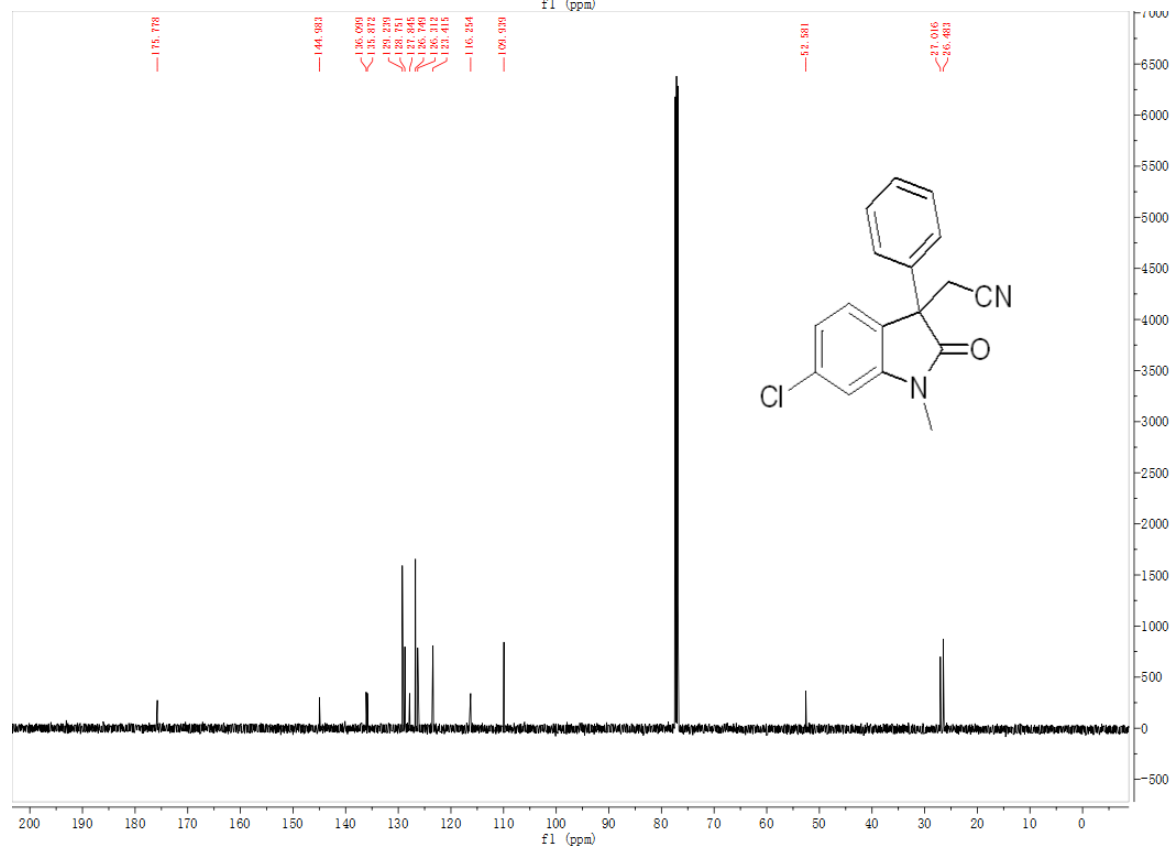

**3ha**  $^1\text{H}$  NMR (500 MHz,  $\text{CDCl}_3$ ),  $^{13}\text{C}$  NMR (125 MHz,  $\text{CDCl}_3$ )

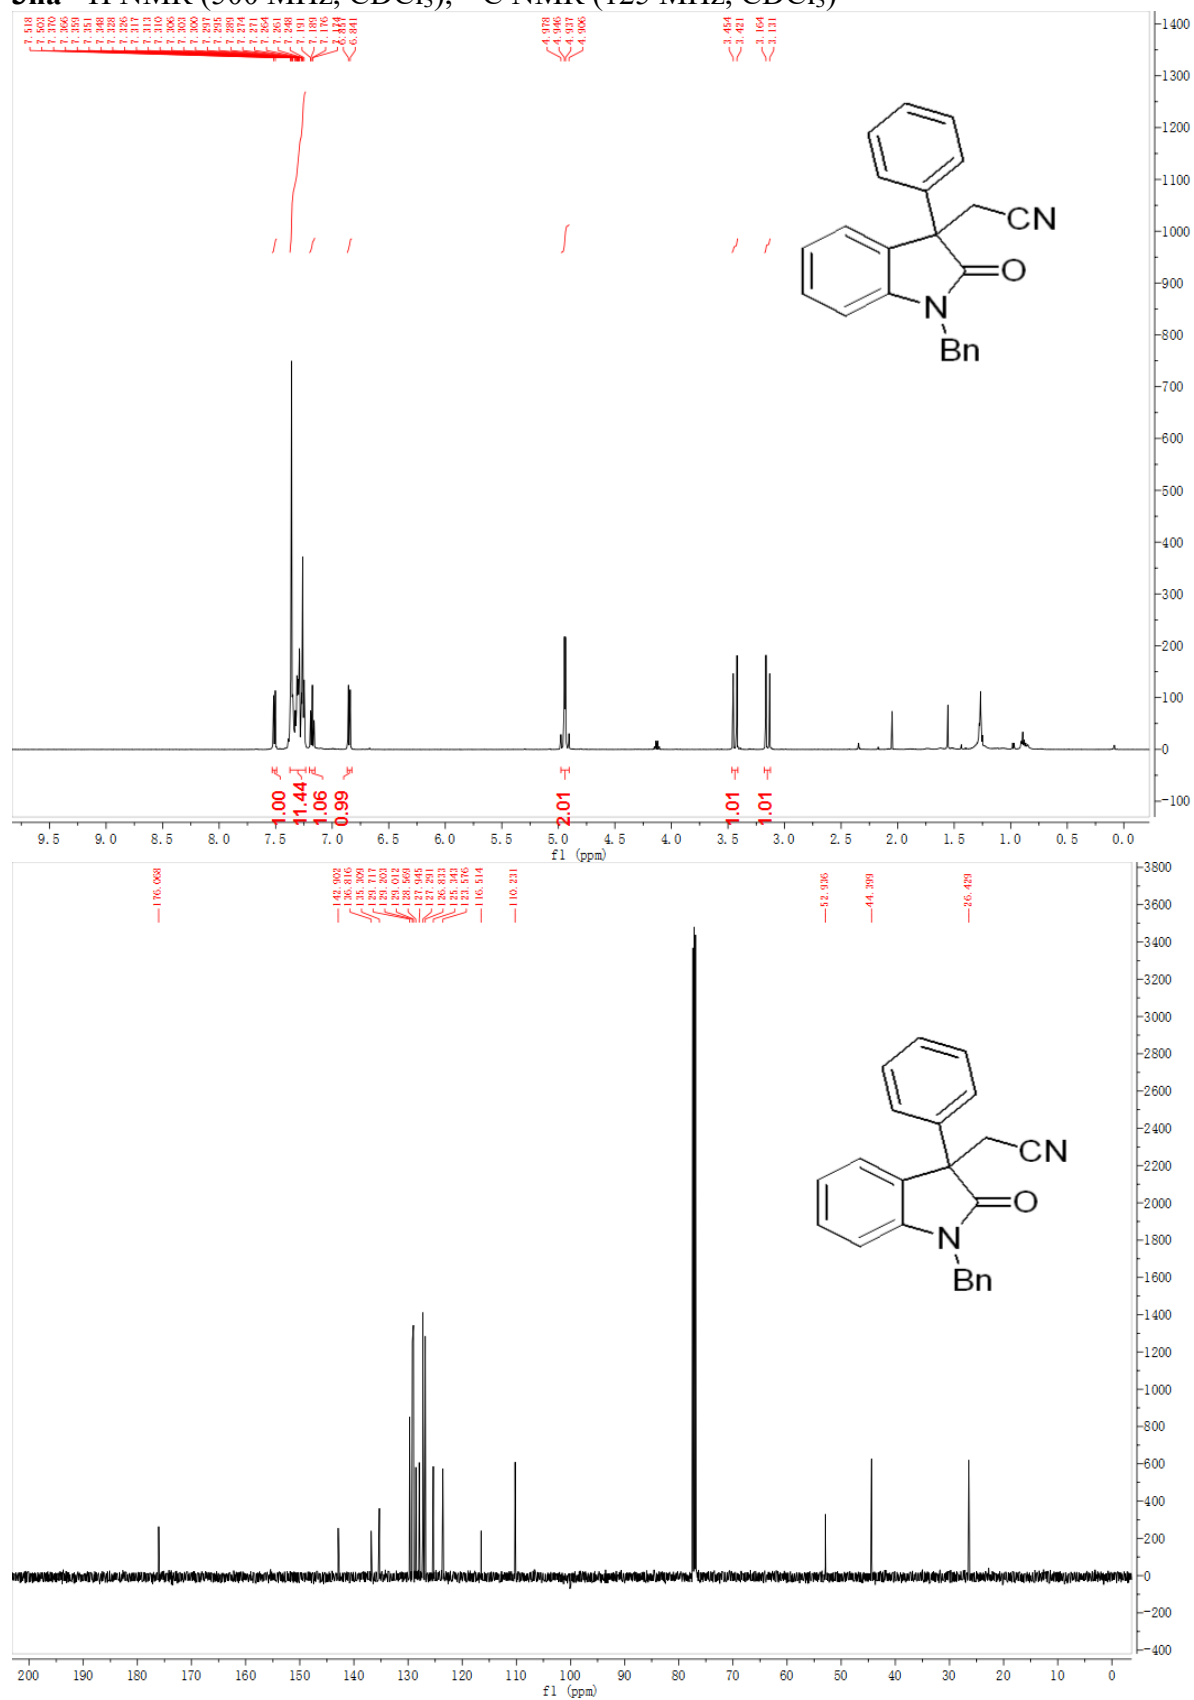

**6aa**  $^1\text{H}$  NMR (500 MHz,  $\text{CDCl}_3$ ),  $^{13}\text{C}$  NMR (125 MHz,  $\text{CDCl}_3$ )

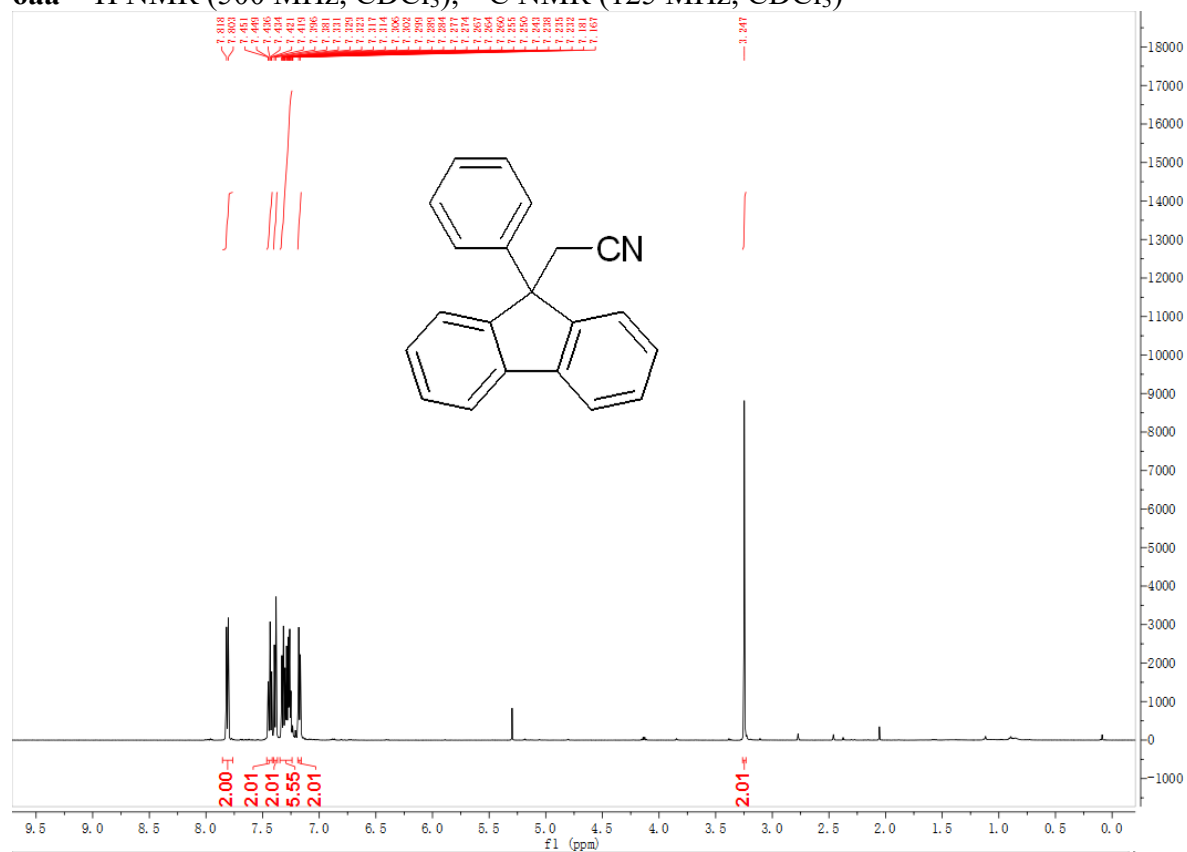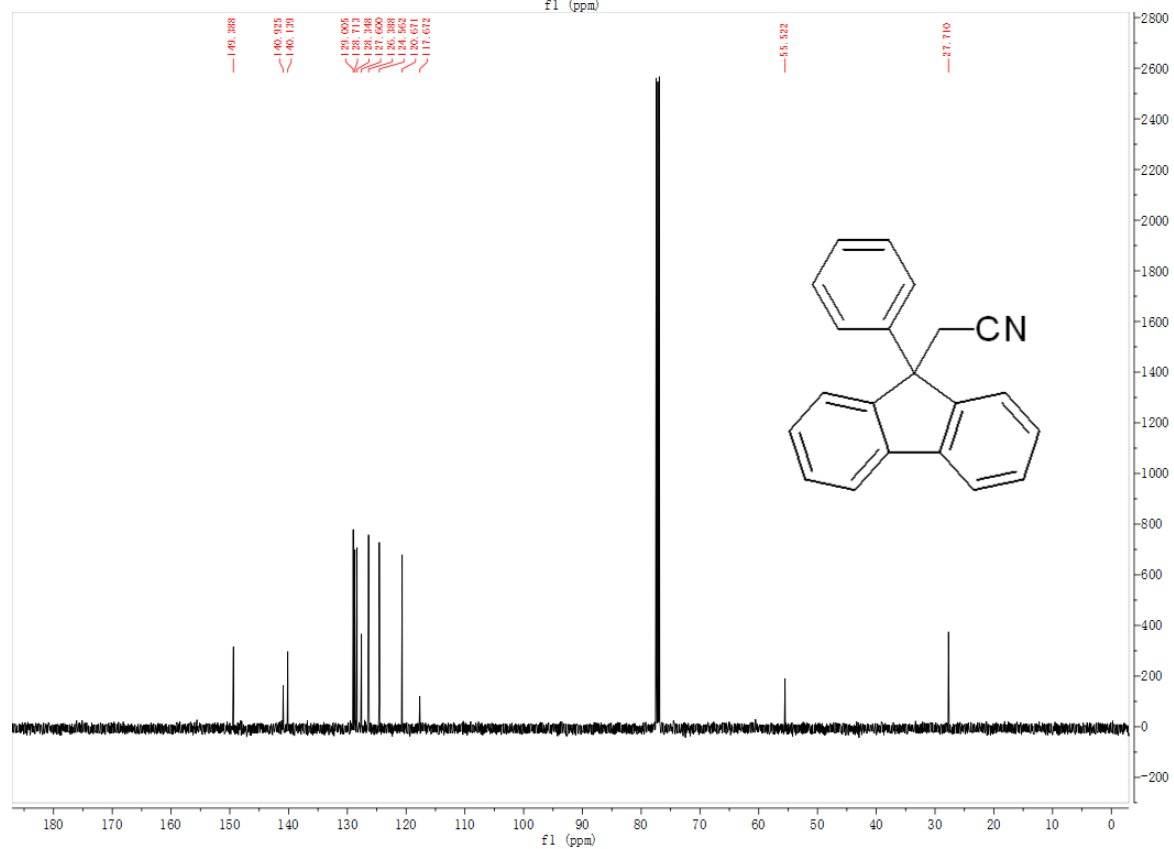



**6ba**  $^1\text{H}$  NMR (500 MHz,  $\text{CDCl}_3$ ),  $^{13}\text{C}$  NMR (125 MHz,  $\text{CDCl}_3$ )

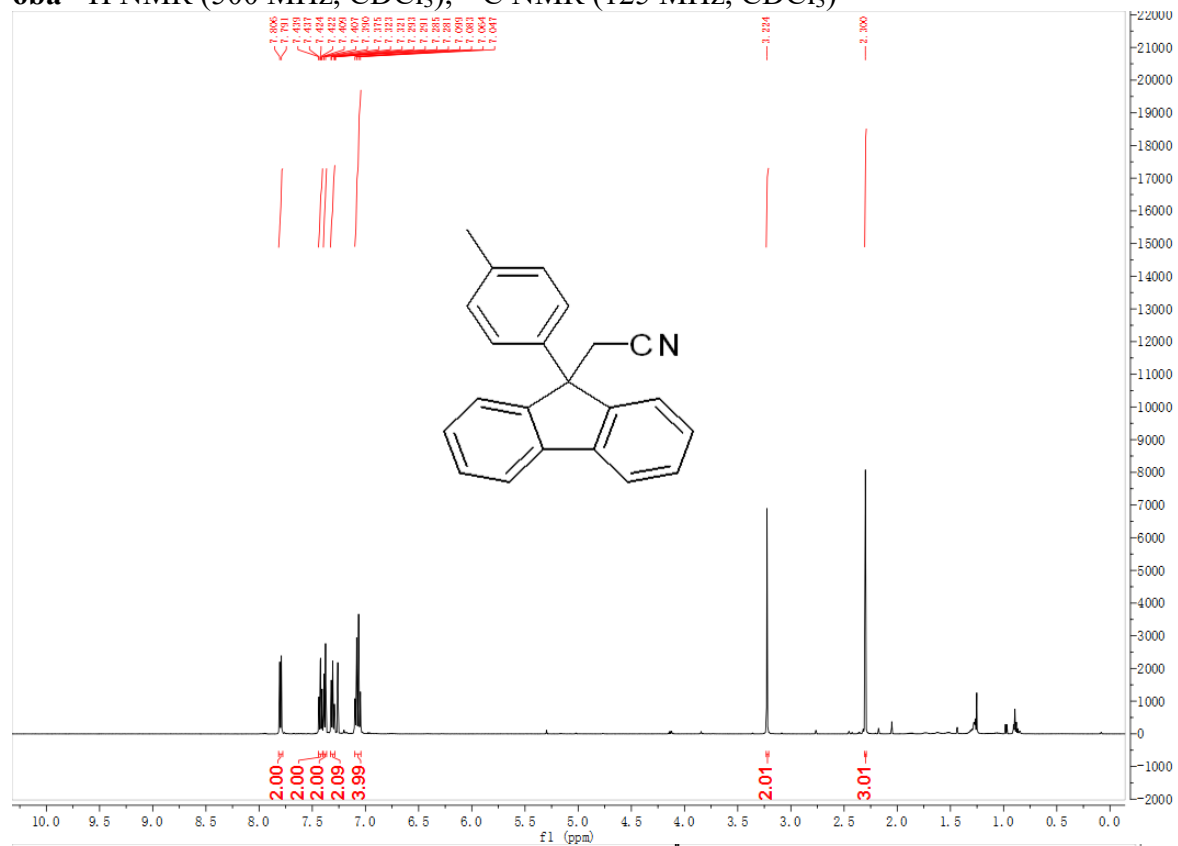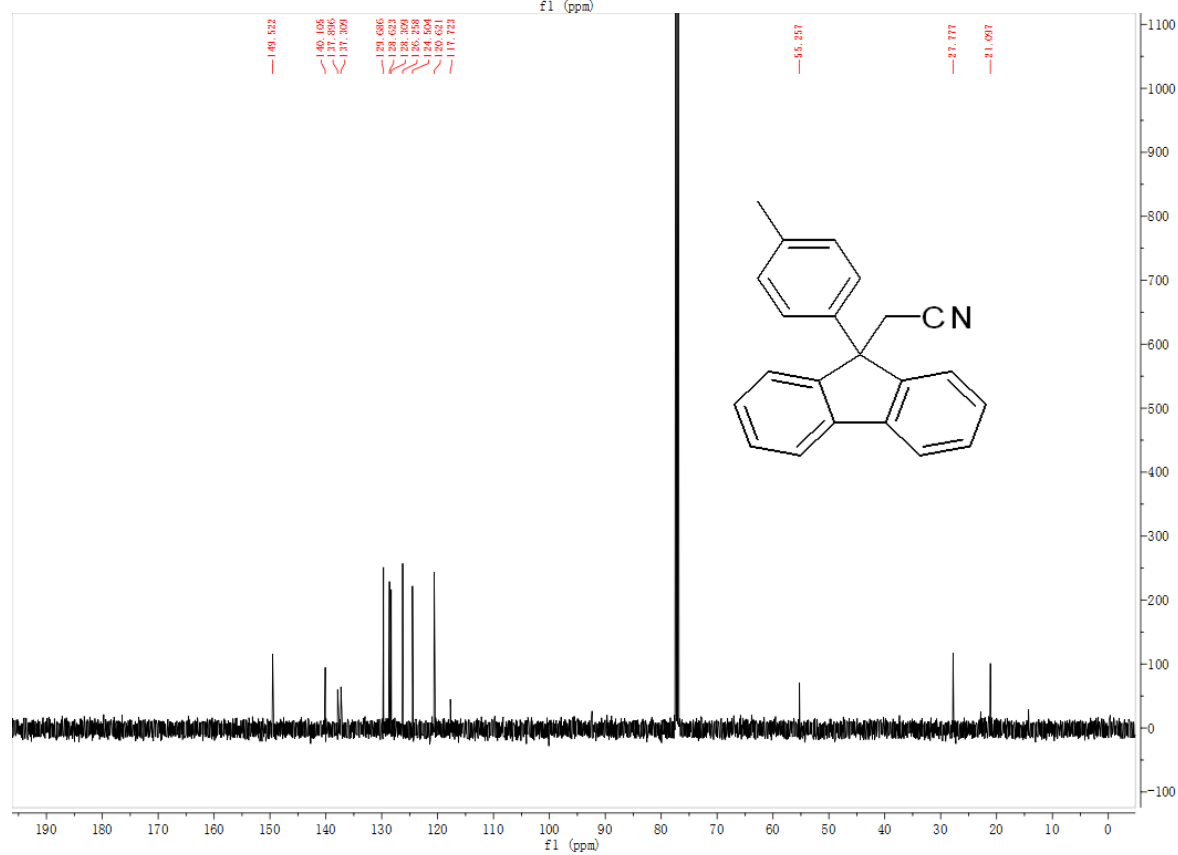

**6ca**  $^1\text{H}$  NMR (500 MHz,  $\text{CDCl}_3$ ),  $^{13}\text{C}$  NMR (125 MHz,  $\text{CDCl}_3$ )

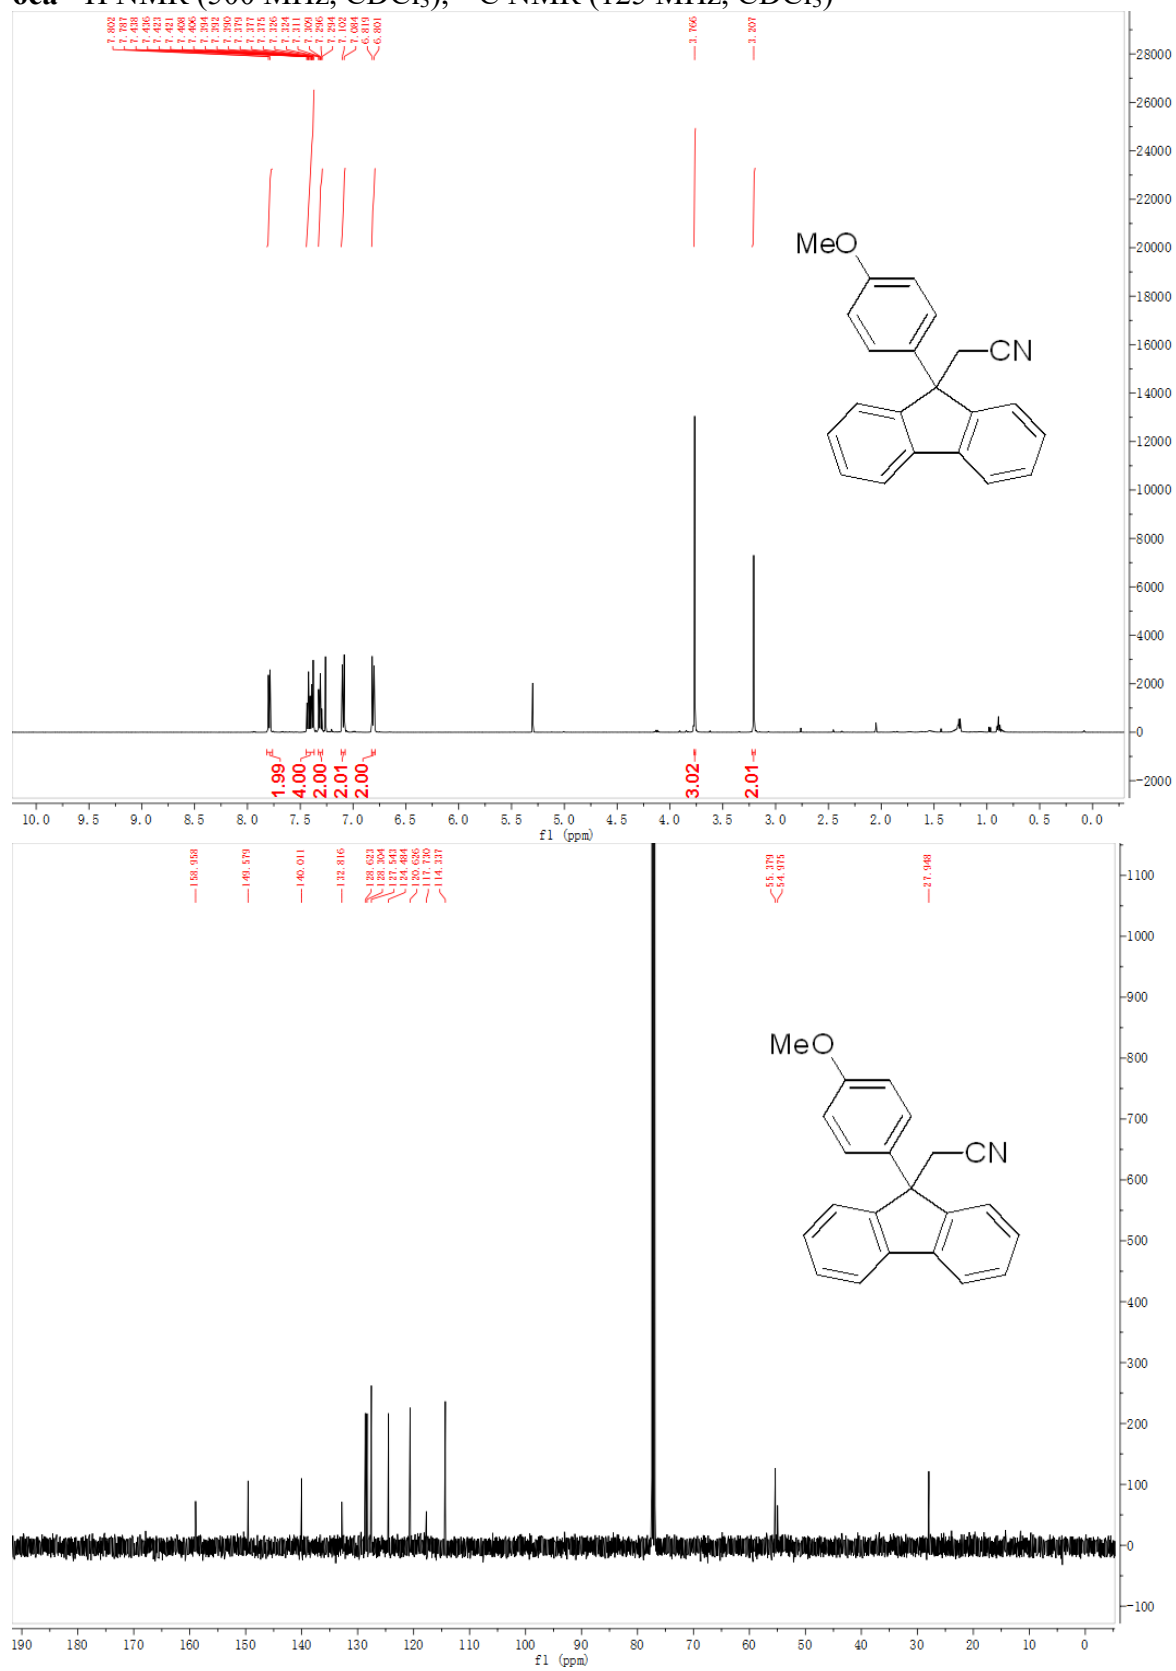

**6da**  $^1\text{H}$  NMR (500 MHz,  $\text{CDCl}_3$ ),  $^{13}\text{C}$  NMR (125 MHz,  $\text{CDCl}_3$ )

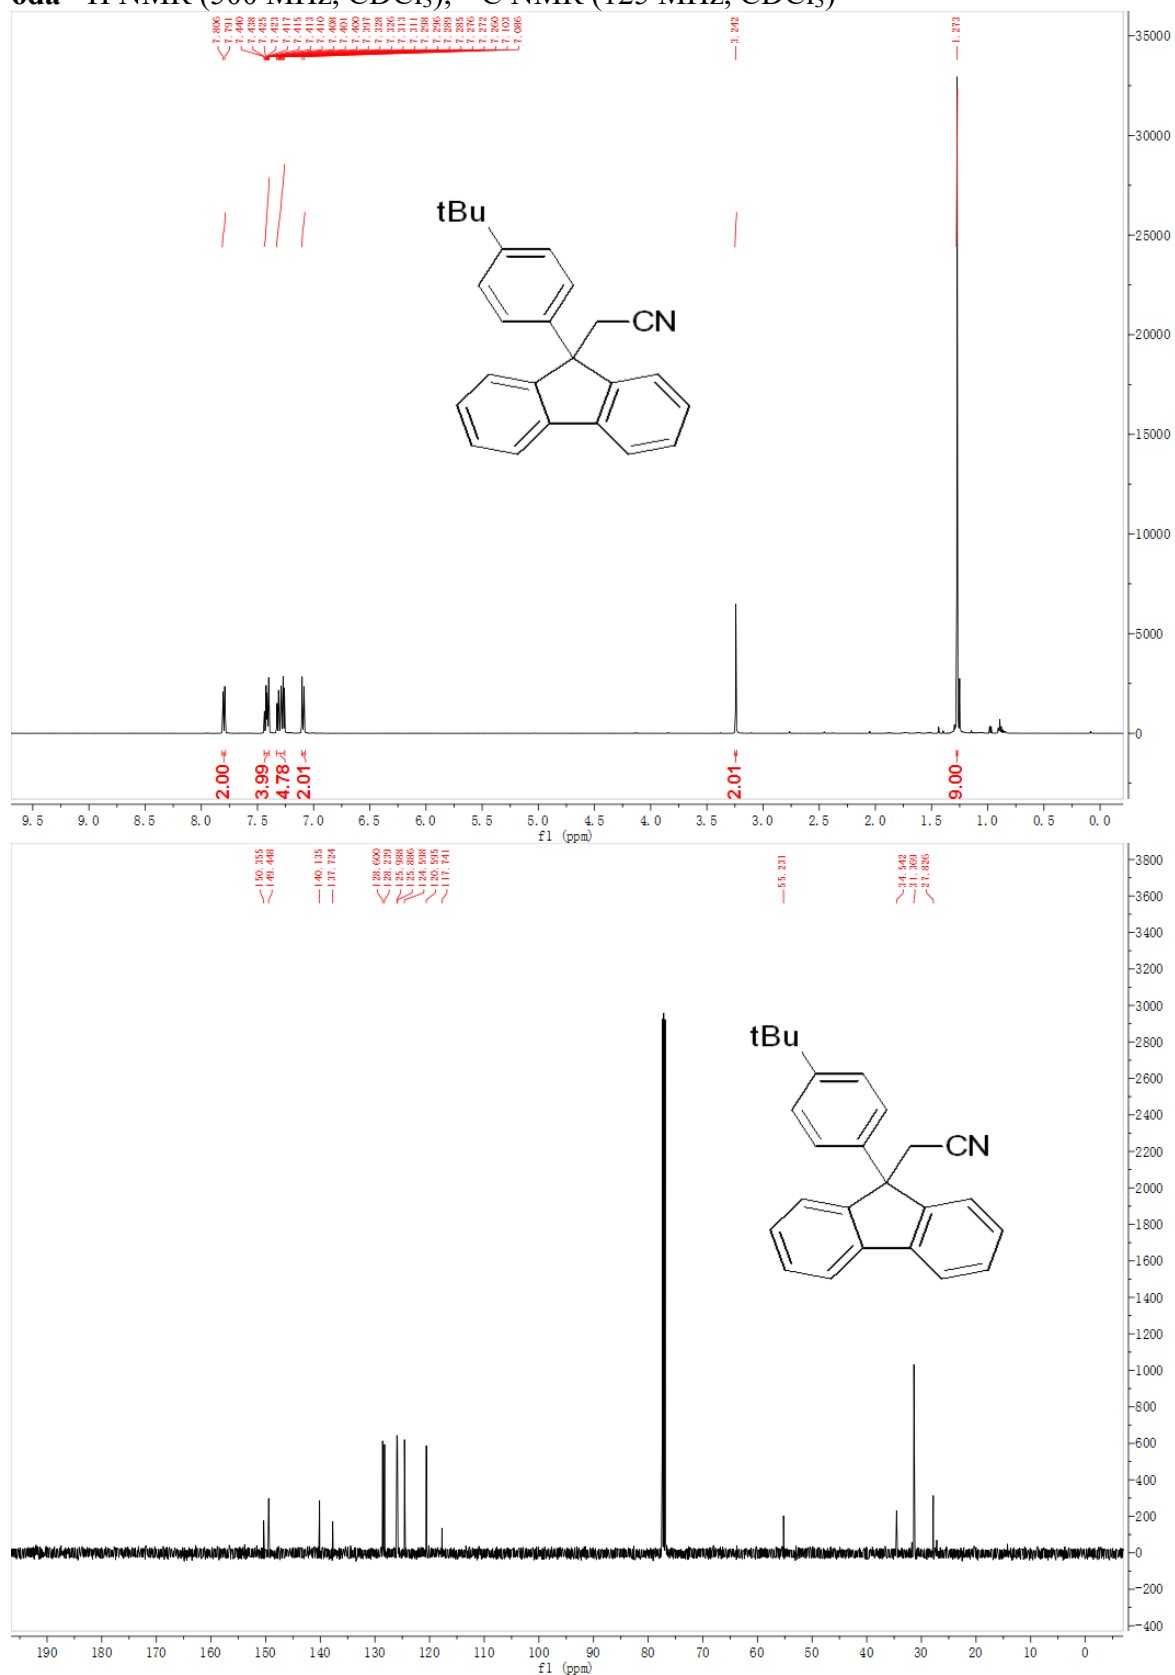

**6ea**  $^1\text{H}$  NMR (500 MHz,  $\text{CDCl}_3$ ),  $^{13}\text{C}$  NMR (125 MHz,  $\text{CDCl}_3$ )

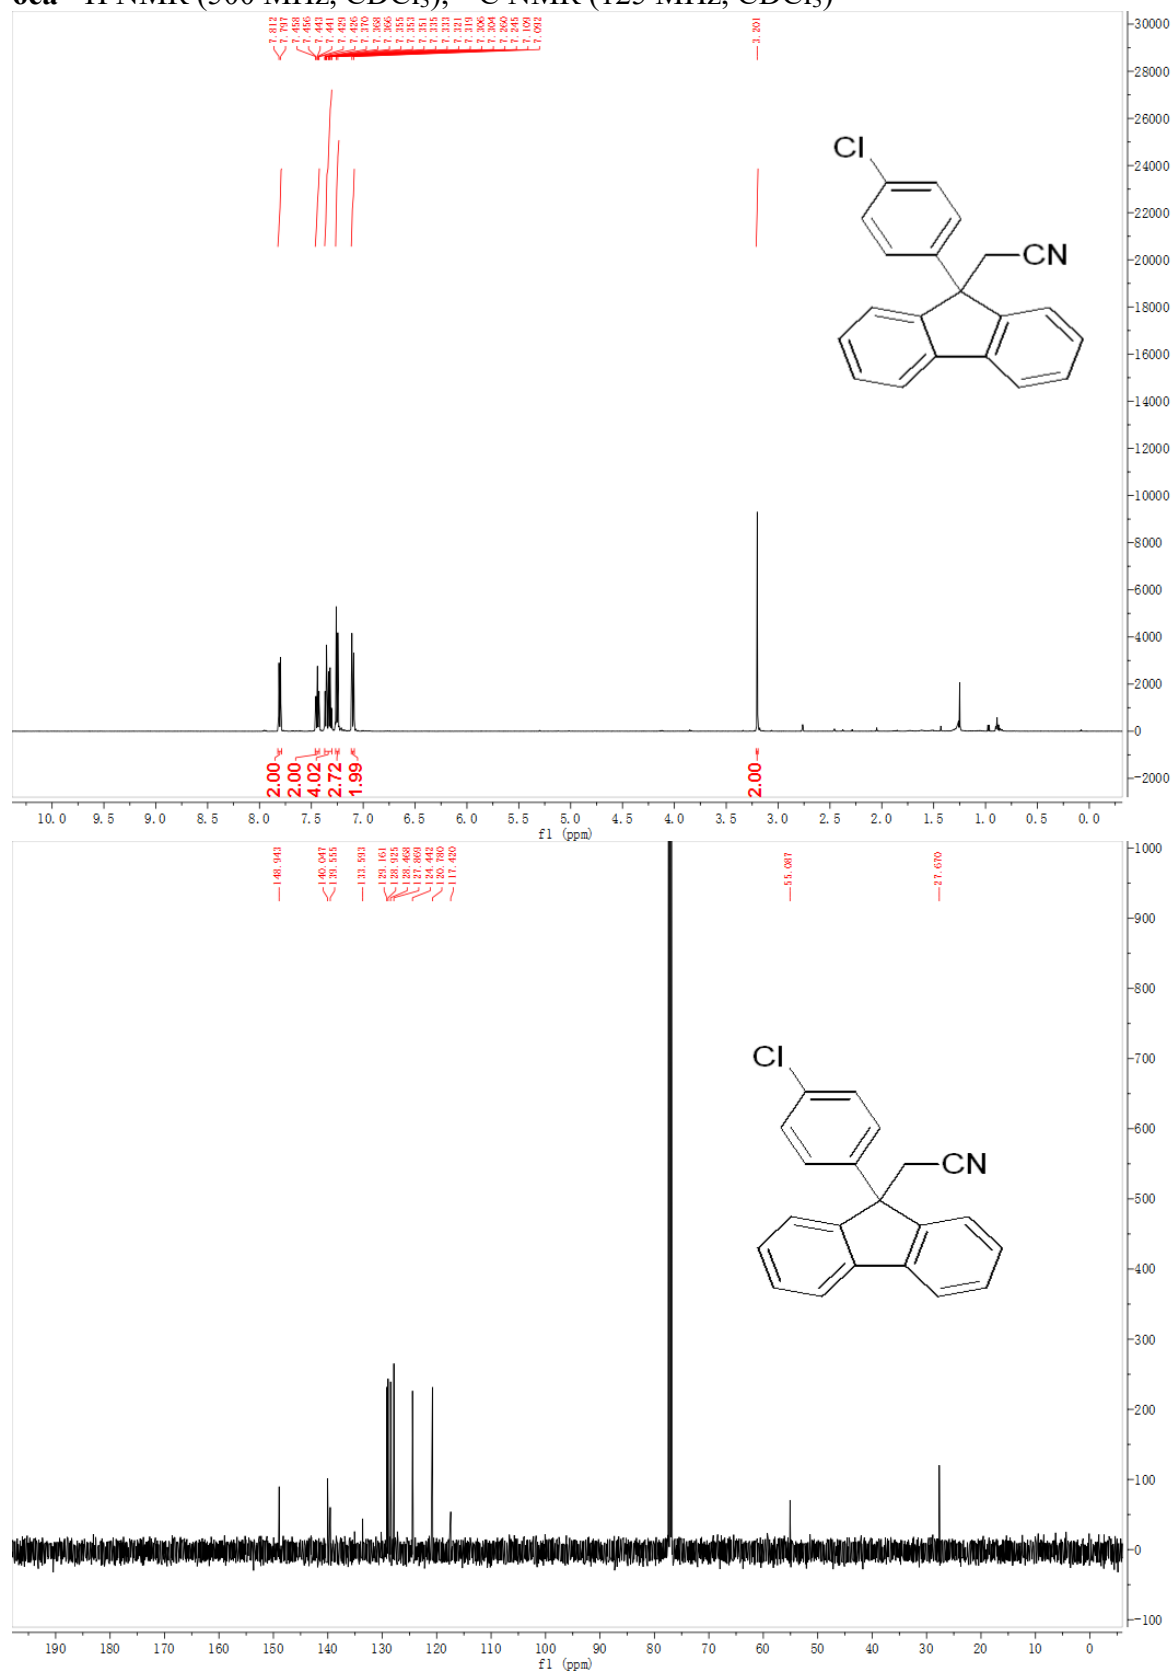

**6fa**  $^1\text{H}$  NMR (500 MHz,  $\text{CDCl}_3$ ),  $^{13}\text{C}$  NMR (125 MHz,  $\text{CDCl}_3$ ),  $^{19}\text{F}$  NMR (376 MHz,  $\text{CDCl}_3$ )

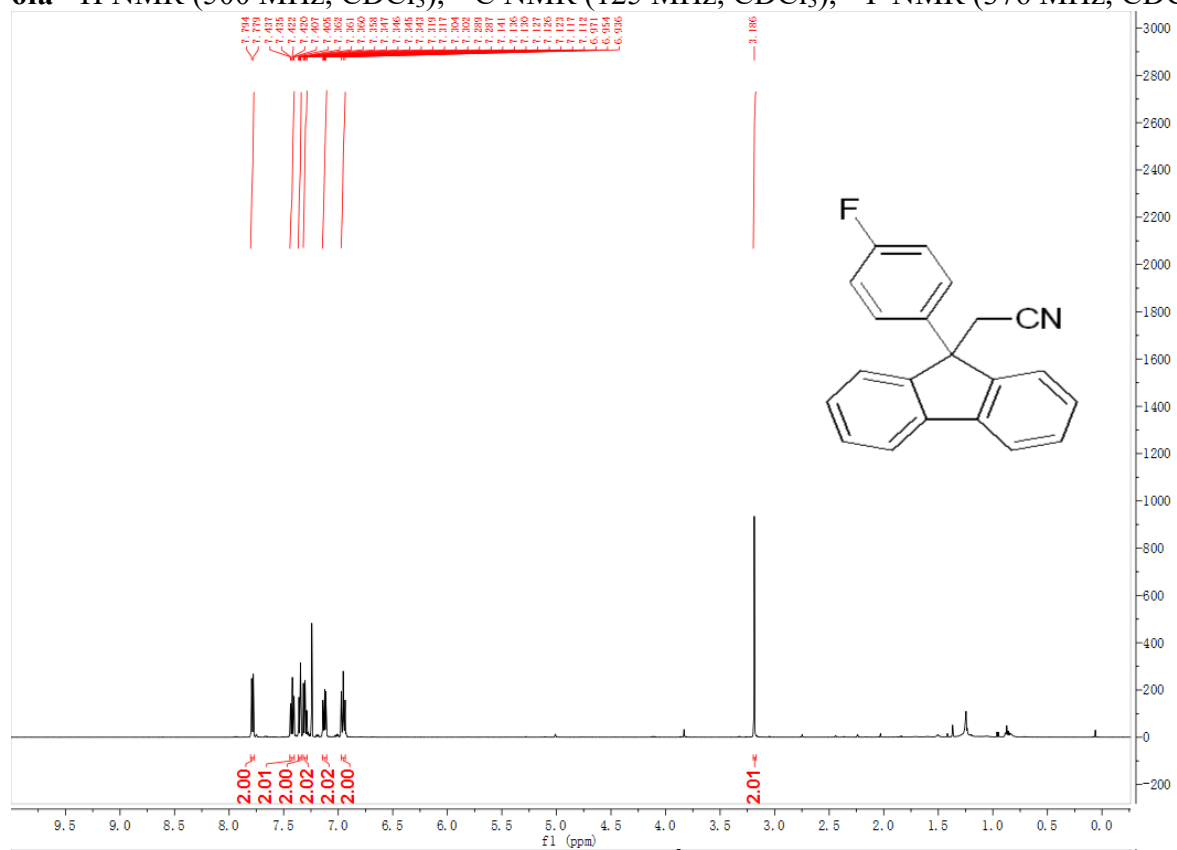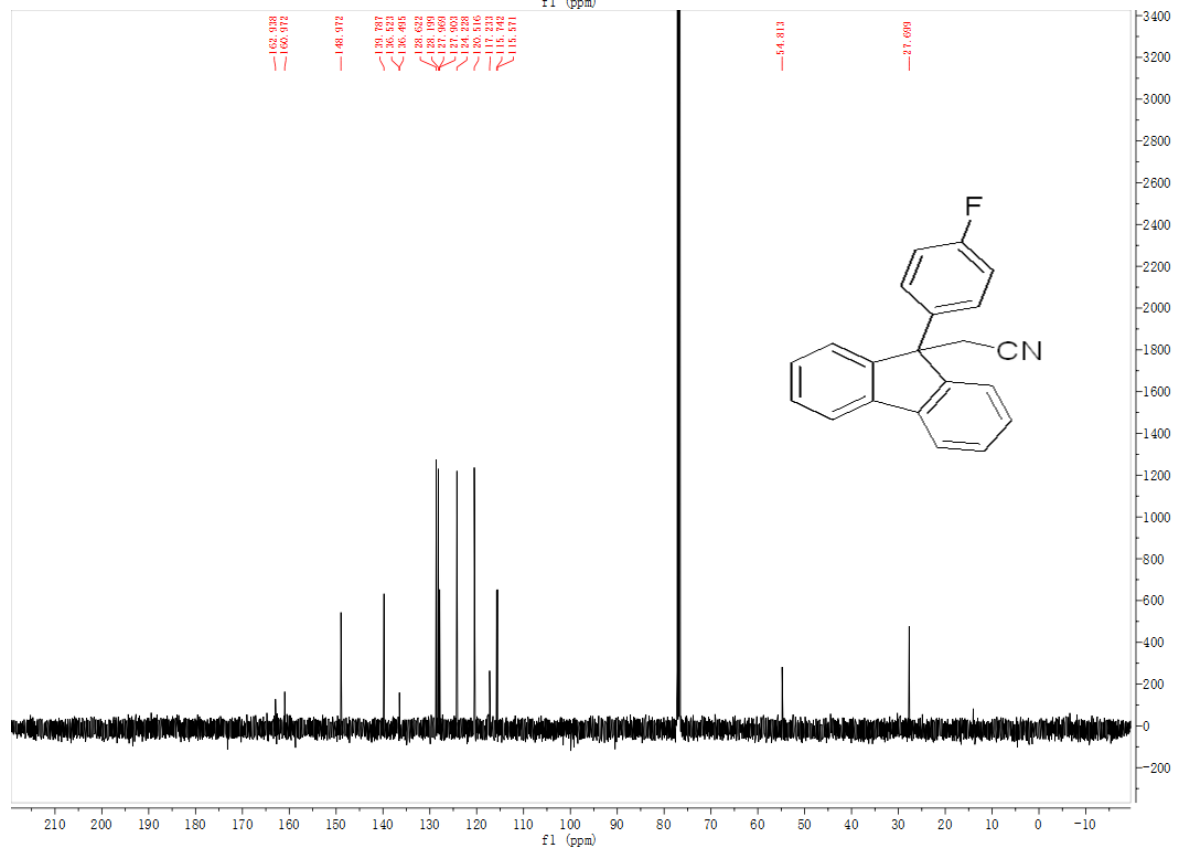

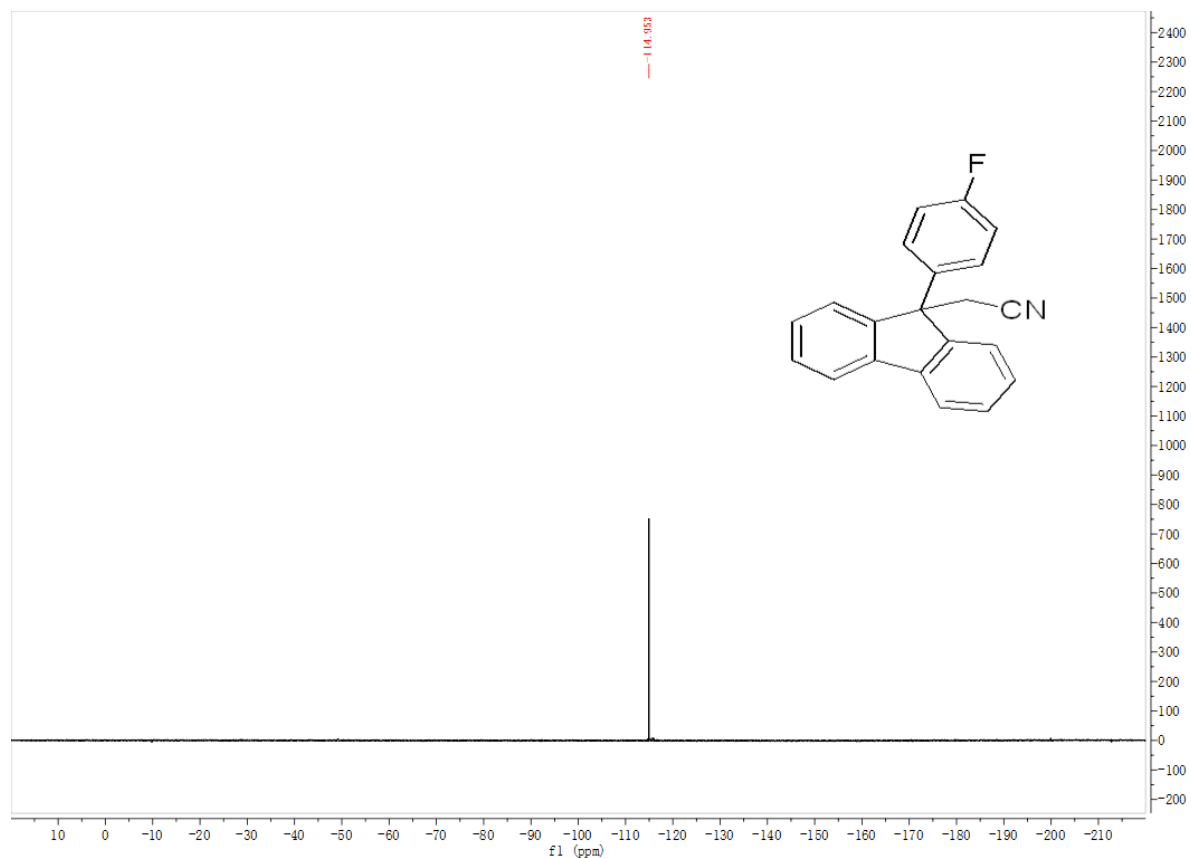

**6ga**  $^1\text{H}$  NMR (500 MHz,  $\text{CDCl}_3$ ),  $^{13}\text{C}$  NMR (125 MHz,  $\text{CDCl}_3$ ),  $^{19}\text{F}$  NMR (376 MHz,  $\text{CDCl}_3$ )

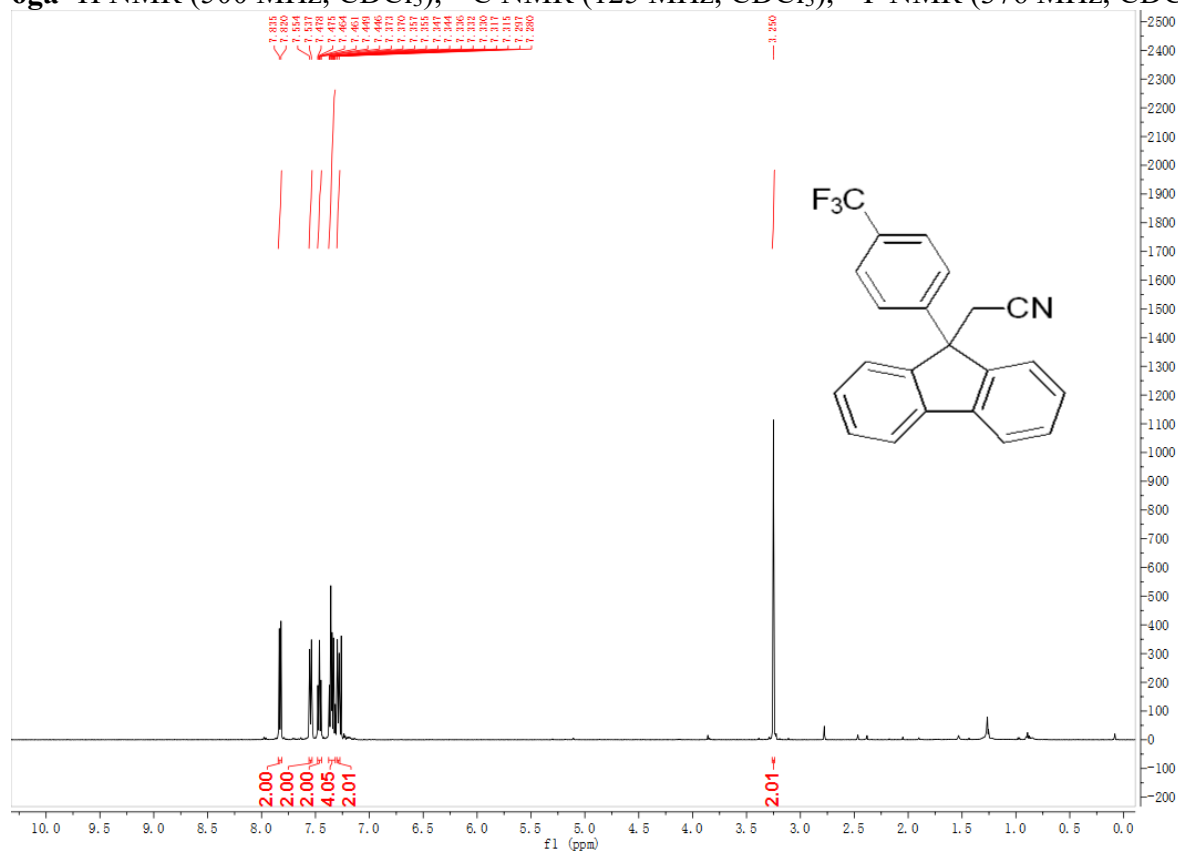

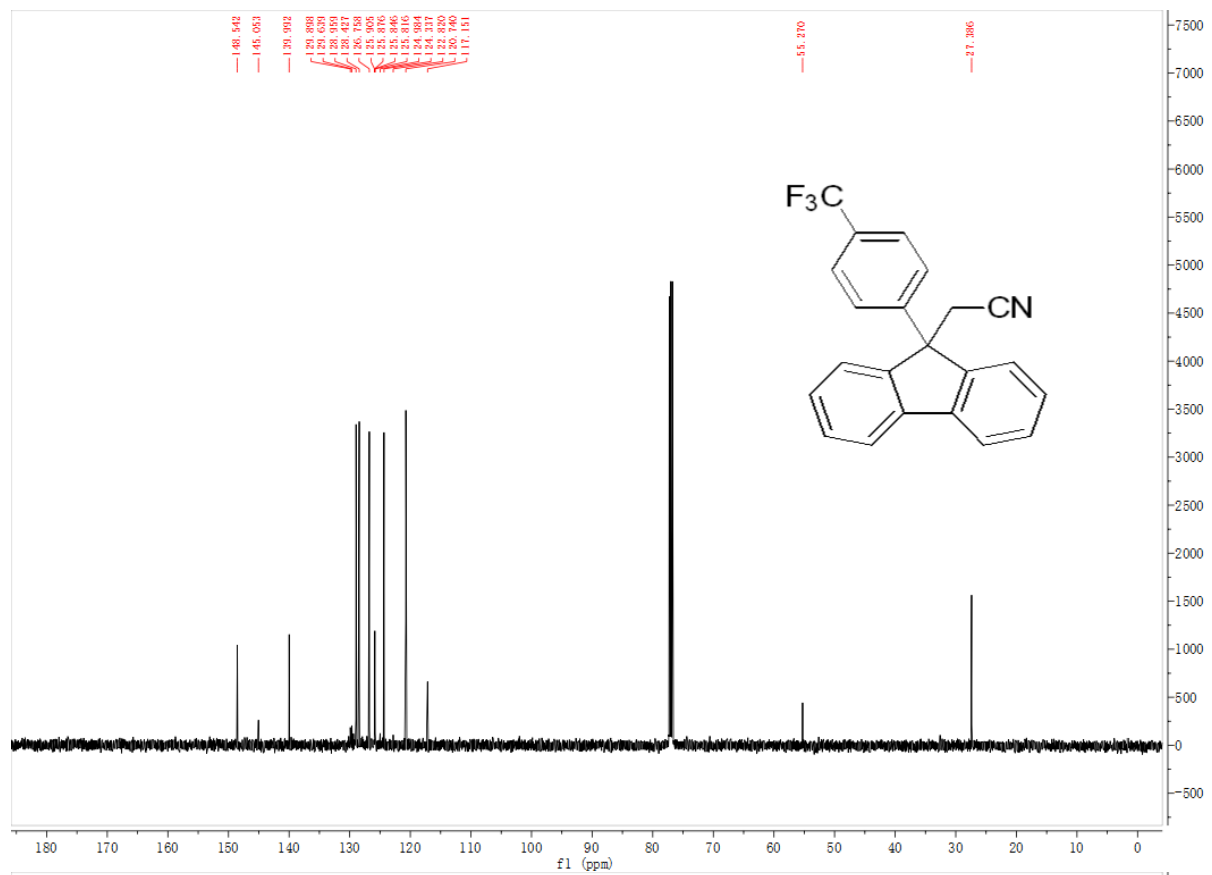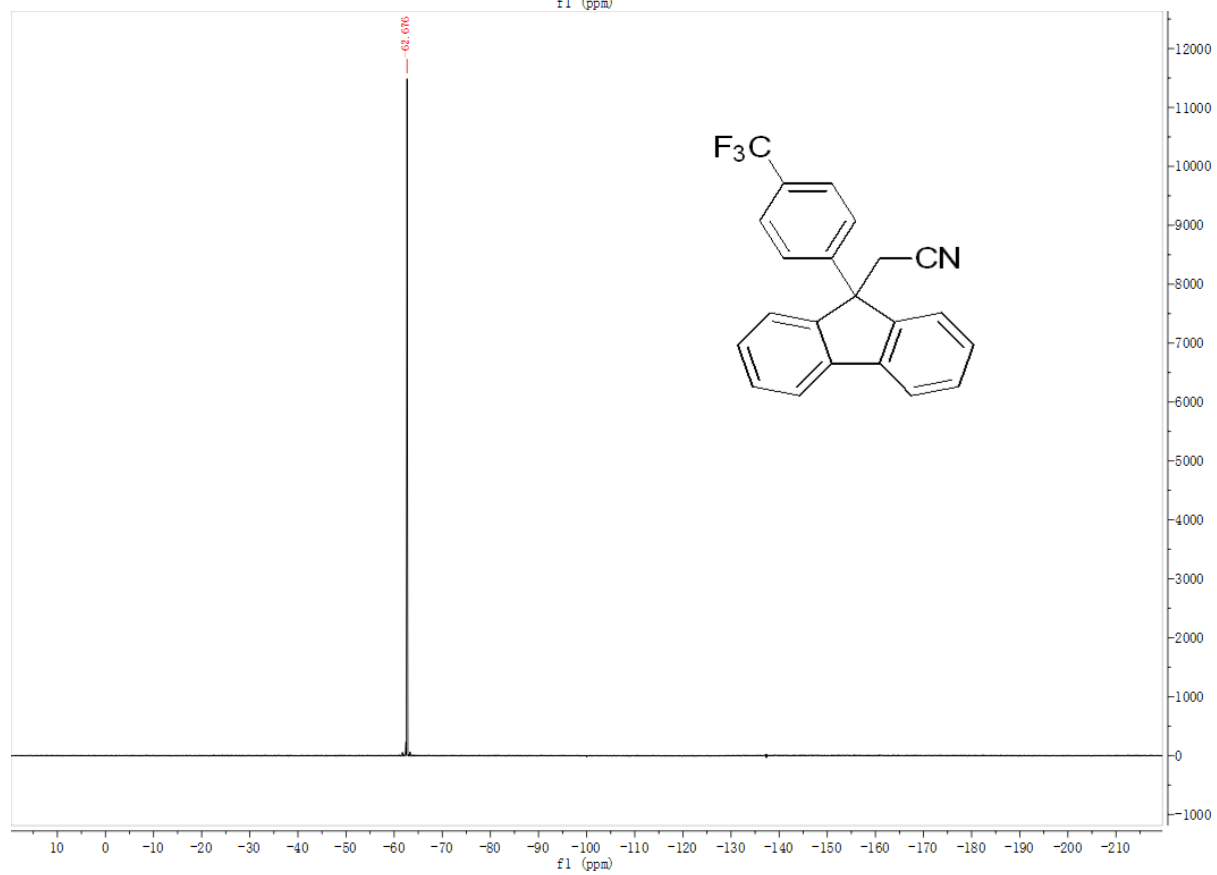

**6ha**  $^1\text{H}$  NMR (500 MHz,  $\text{CDCl}_3$ ),  $^{13}\text{C}$  NMR (125 MHz,  $\text{CDCl}_3$ )

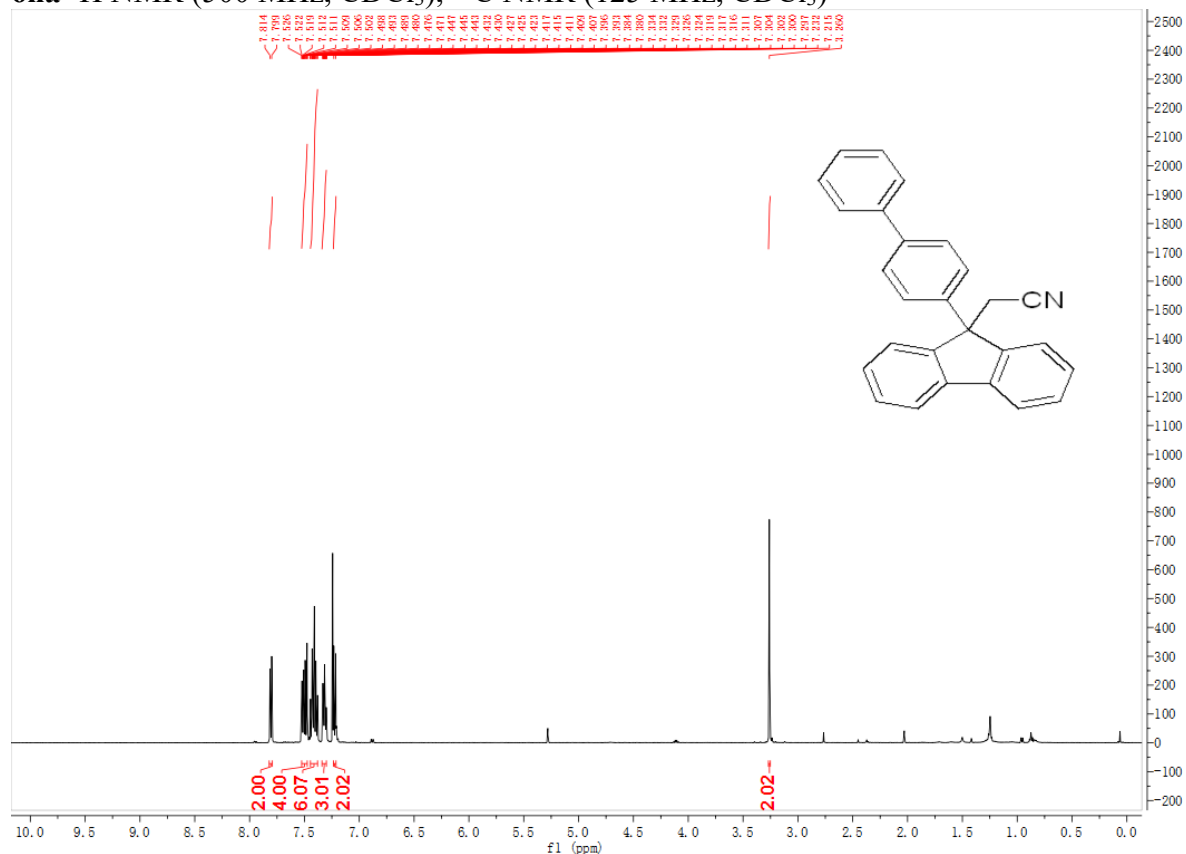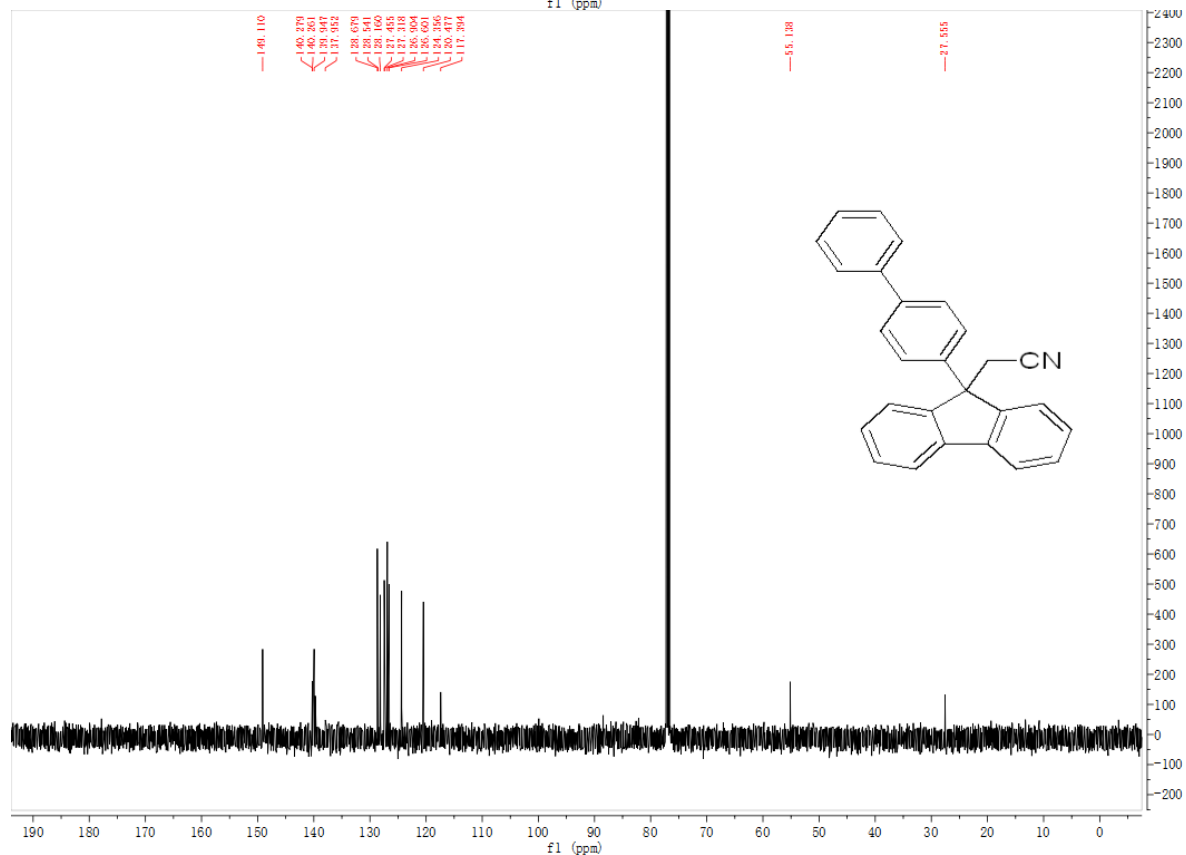



**6ia**  $^1\text{H}$  NMR (500 MHz,  $\text{CDCl}_3$ ),  $^{13}\text{C}$  NMR (125 MHz,  $\text{CDCl}_3$ )

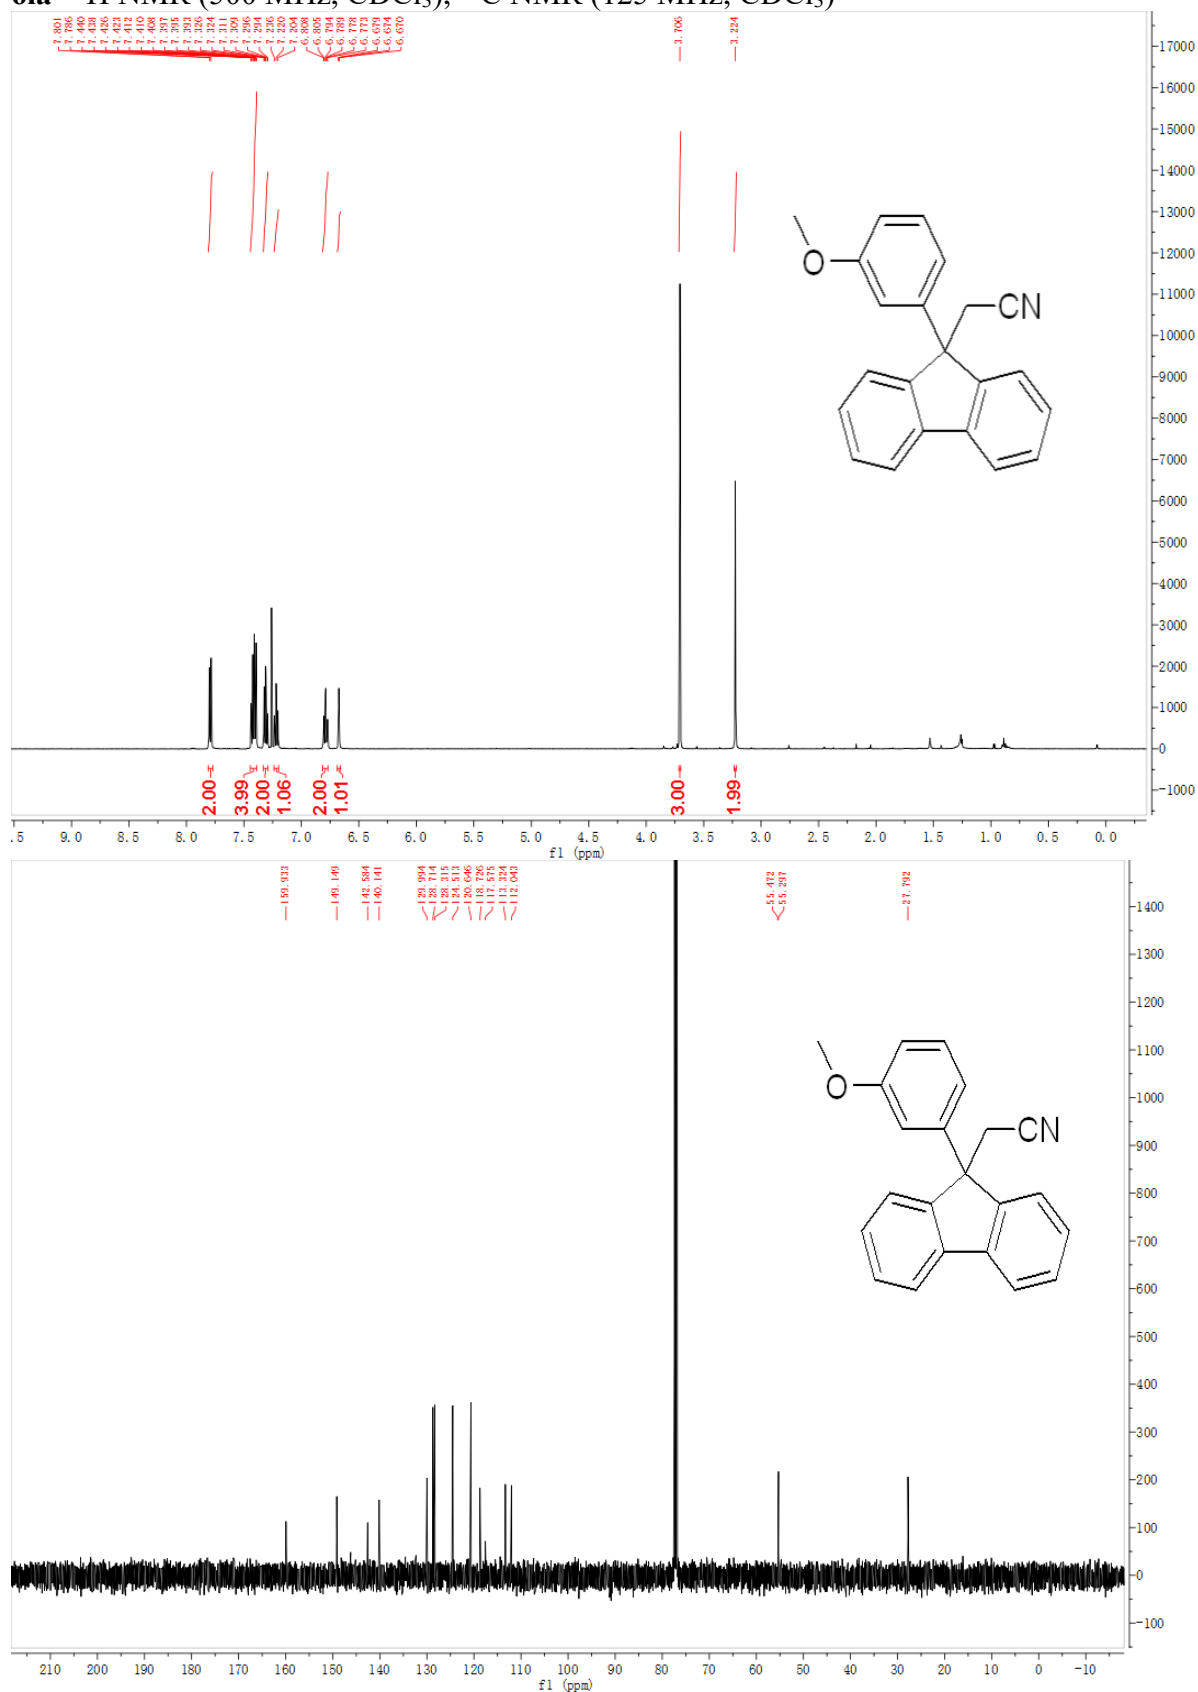

**6ja**  $^1\text{H}$  NMR (500 MHz,  $\text{CDCl}_3$ ),  $^{13}\text{C}$  NMR (125 MHz,  $\text{CDCl}_3$ ),  $^{19}\text{F}$  NMR (376 MHz,  $\text{CDCl}_3$ )

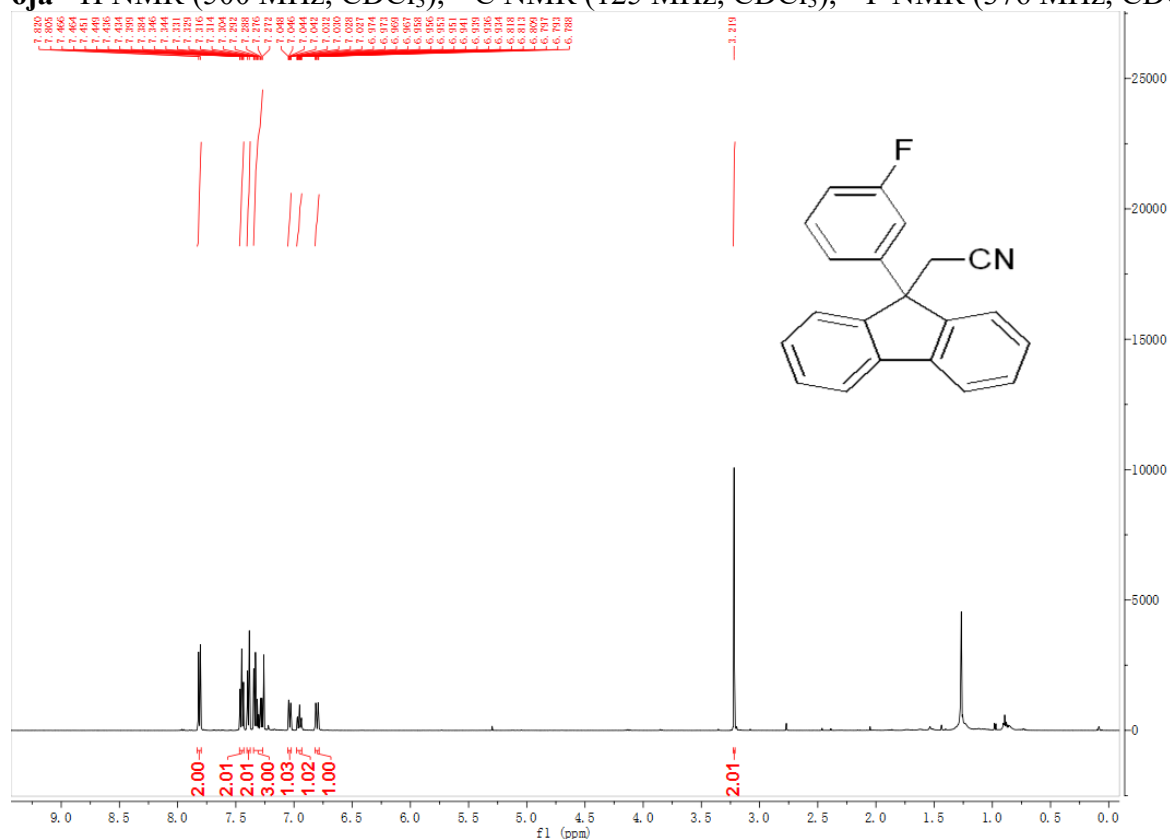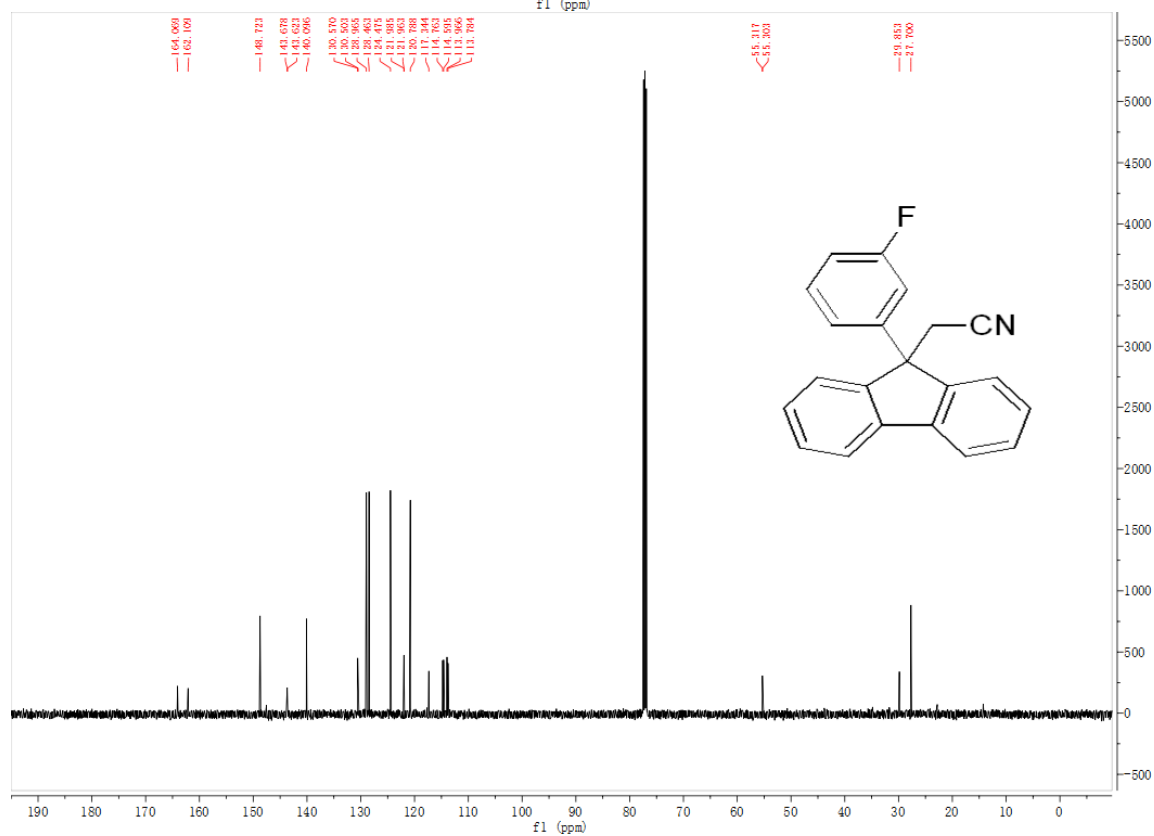

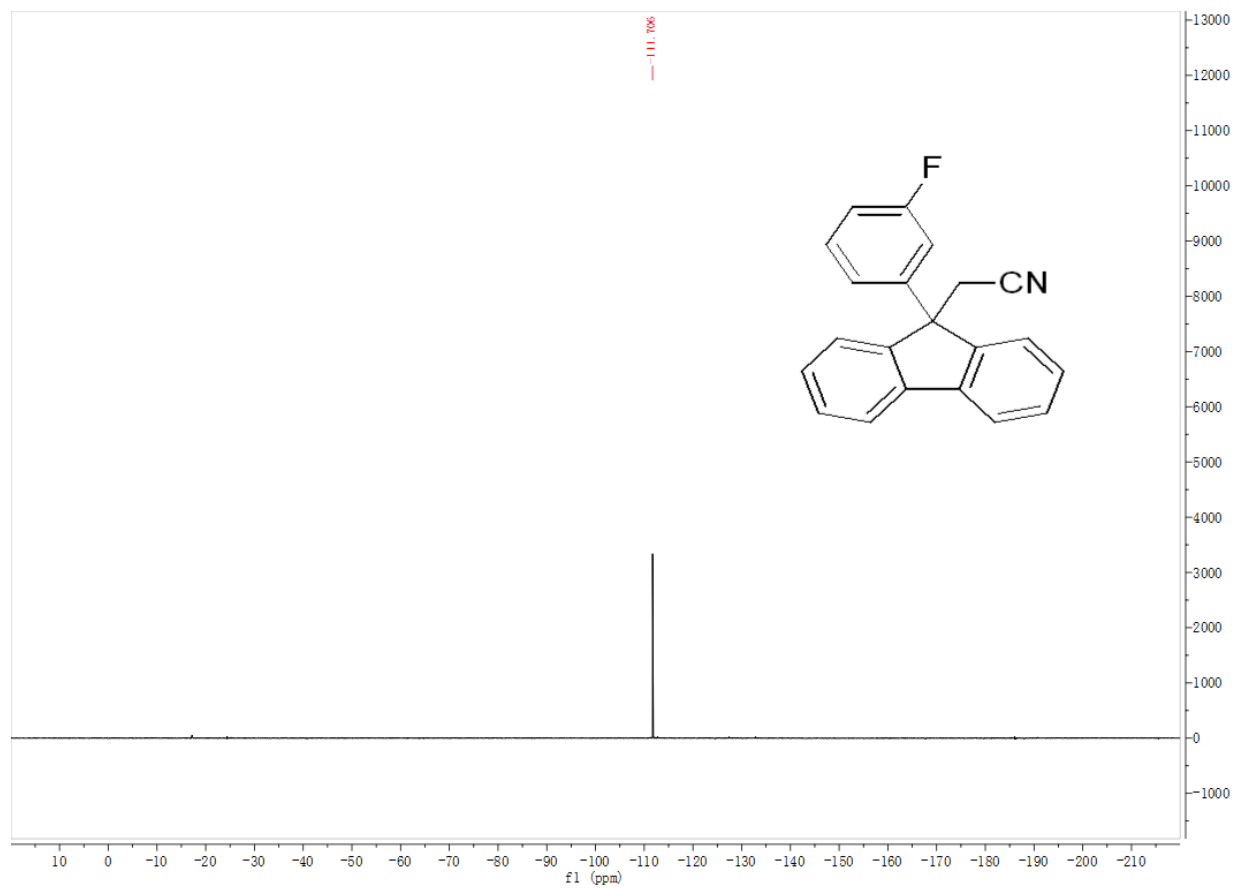

**6ka**  $^1\text{H}$  NMR (500 MHz,  $\text{CDCl}_3$ ),  $^{13}\text{C}$  NMR (125 MHz,  $\text{CDCl}_3$ )

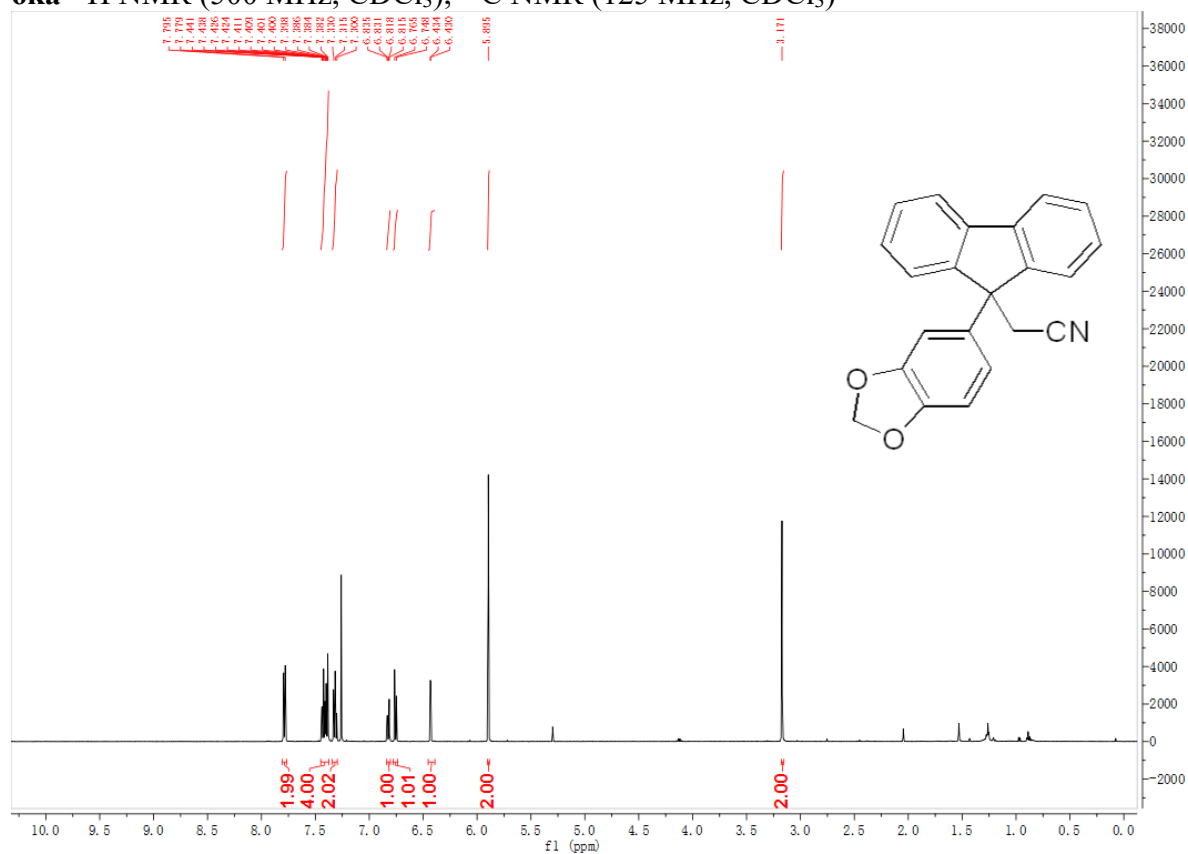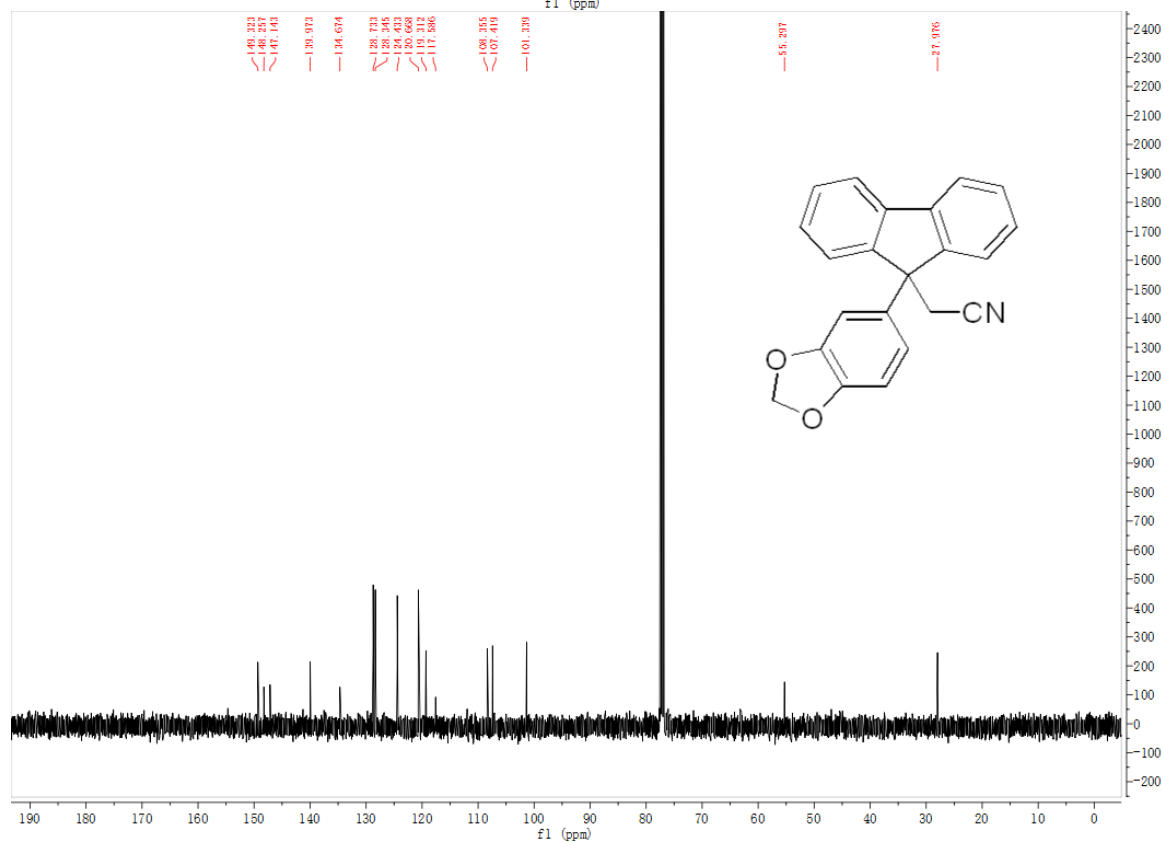

**6la**  $^1\text{H}$  NMR (500 MHz,  $\text{CDCl}_3$ ),  $^{13}\text{C}$  NMR (125 MHz,  $\text{CDCl}_3$ )

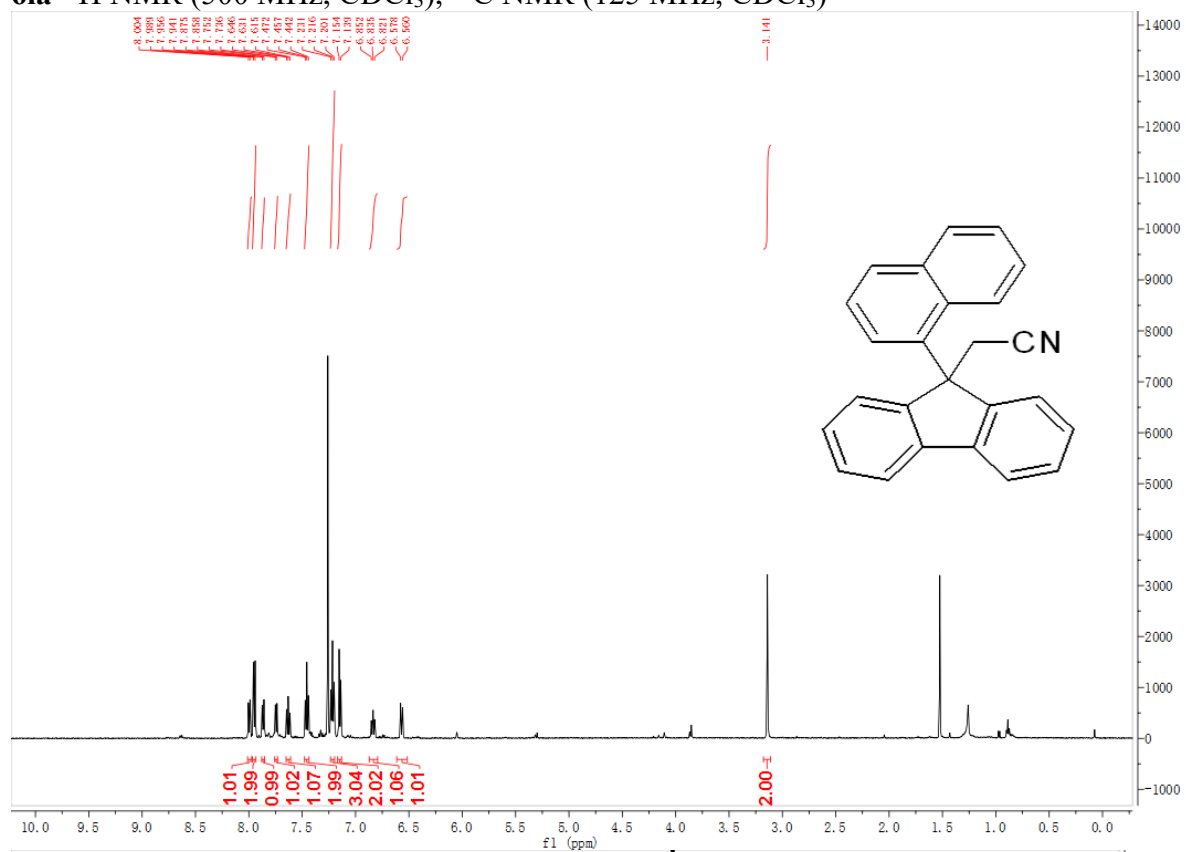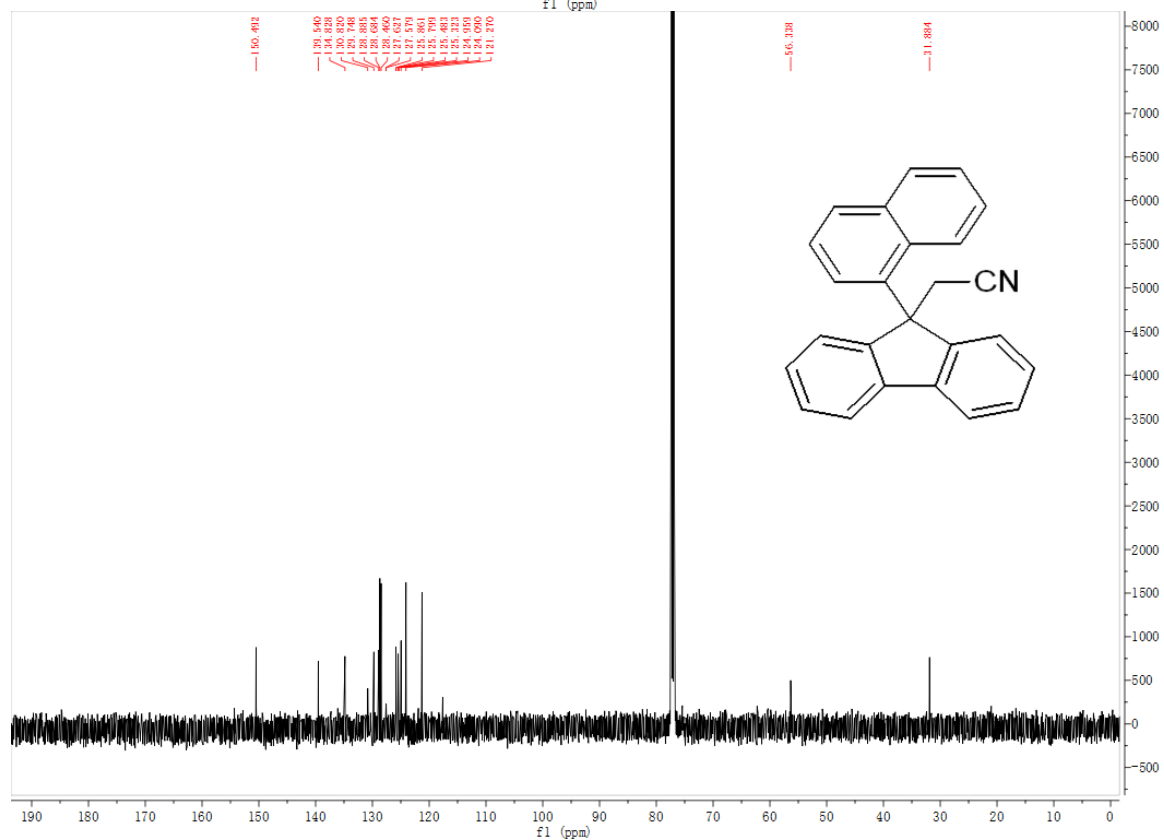

**6ma**  $^1\text{H}$  NMR (500 MHz,  $\text{CDCl}_3$ ),  $^{13}\text{C}$  NMR (125 MHz,  $\text{CDCl}_3$ )

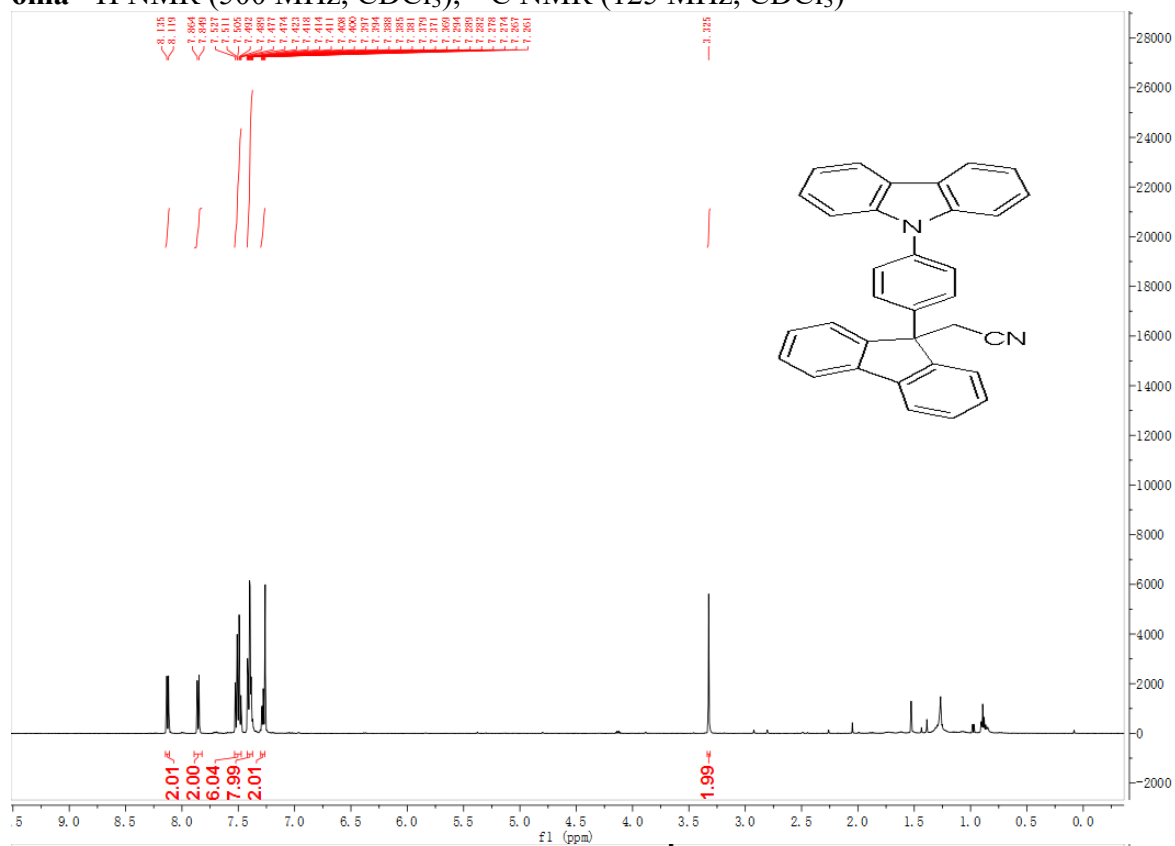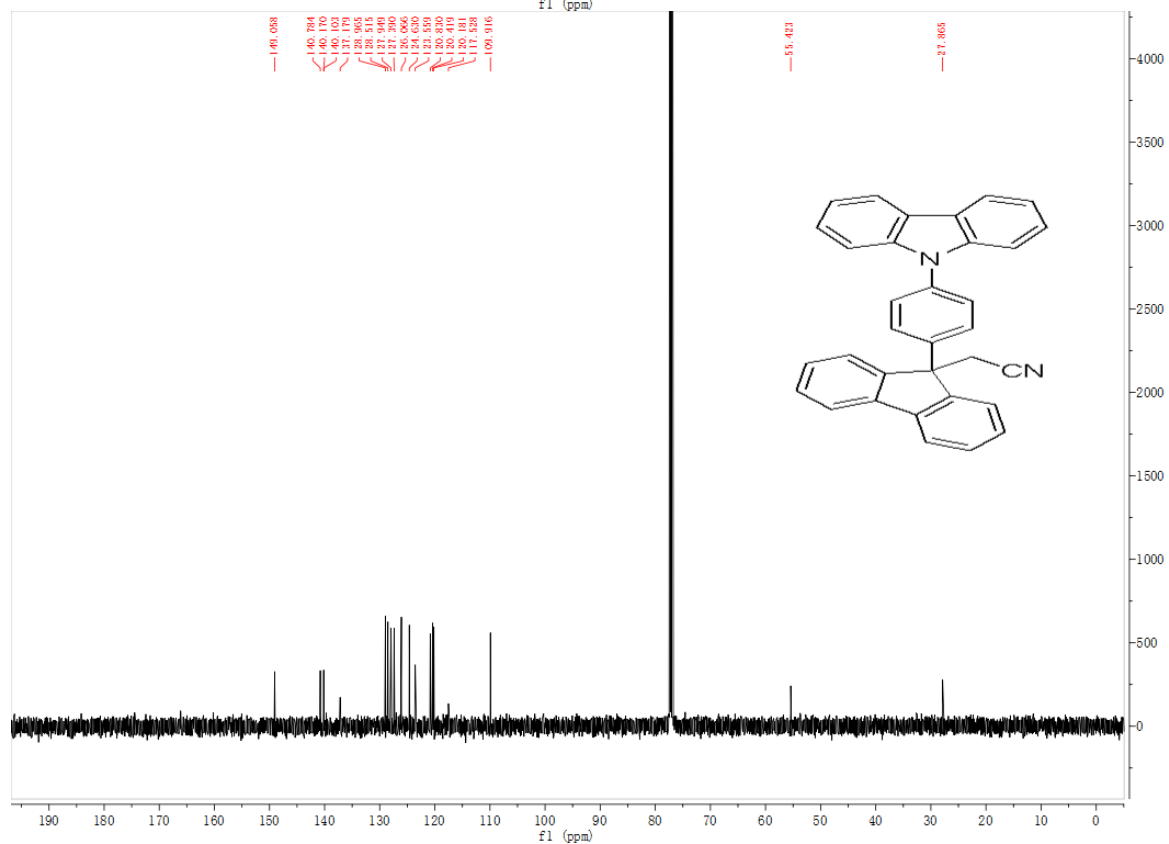

**6na**  $^1\text{H}$  NMR (500 MHz,  $\text{CDCl}_3$ ),  $^{13}\text{C}$  NMR (125 MHz,  $\text{CDCl}_3$ )

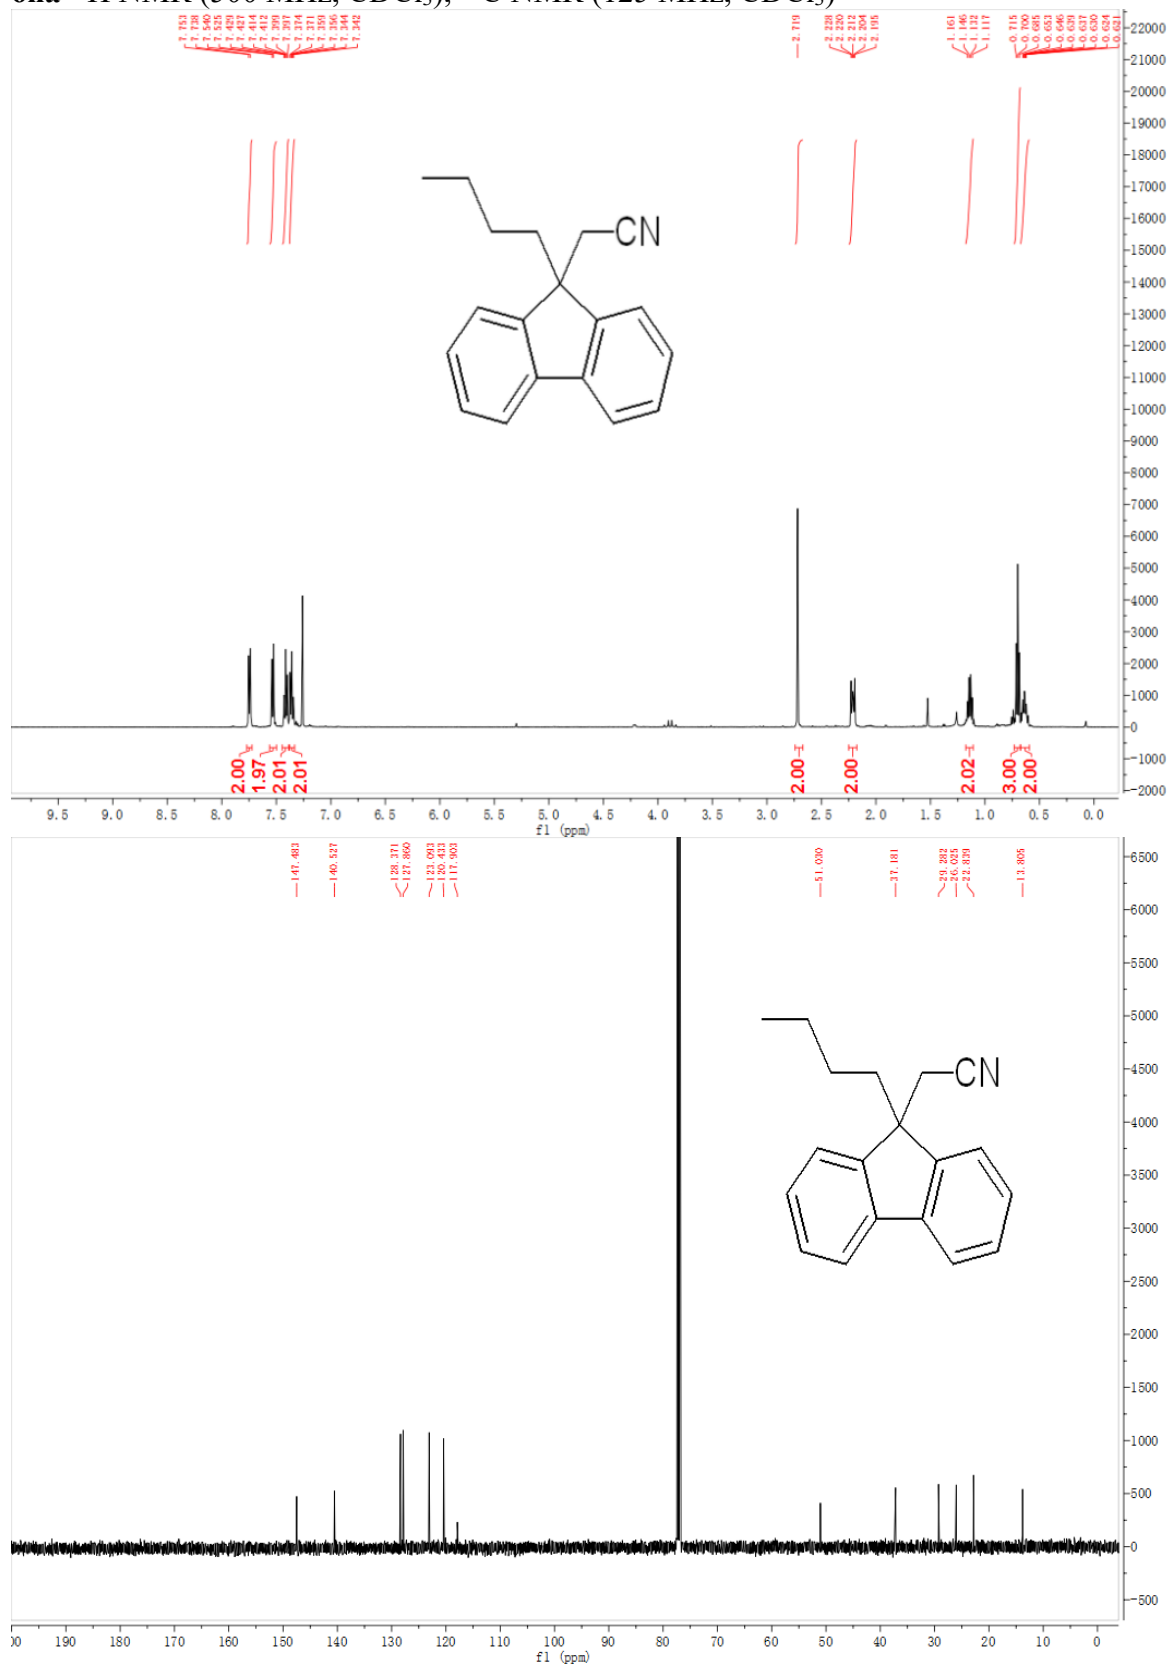

**60a**  $^1\text{H}$  NMR (500 MHz,  $\text{CDCl}_3$ ),  $^{13}\text{C}$  NMR (125 MHz,  $\text{CDCl}_3$ ),  $^{19}\text{F}$  NMR (376 MHz,  $\text{CDCl}_3$ )

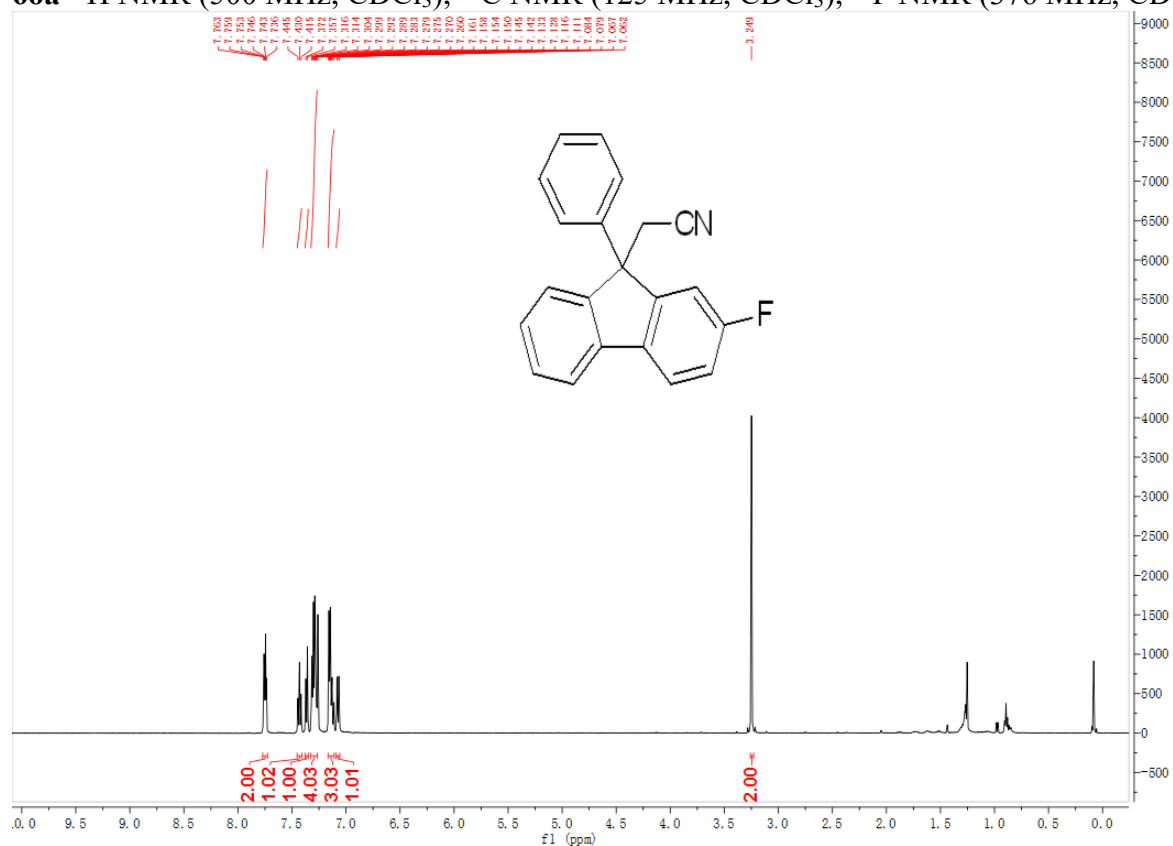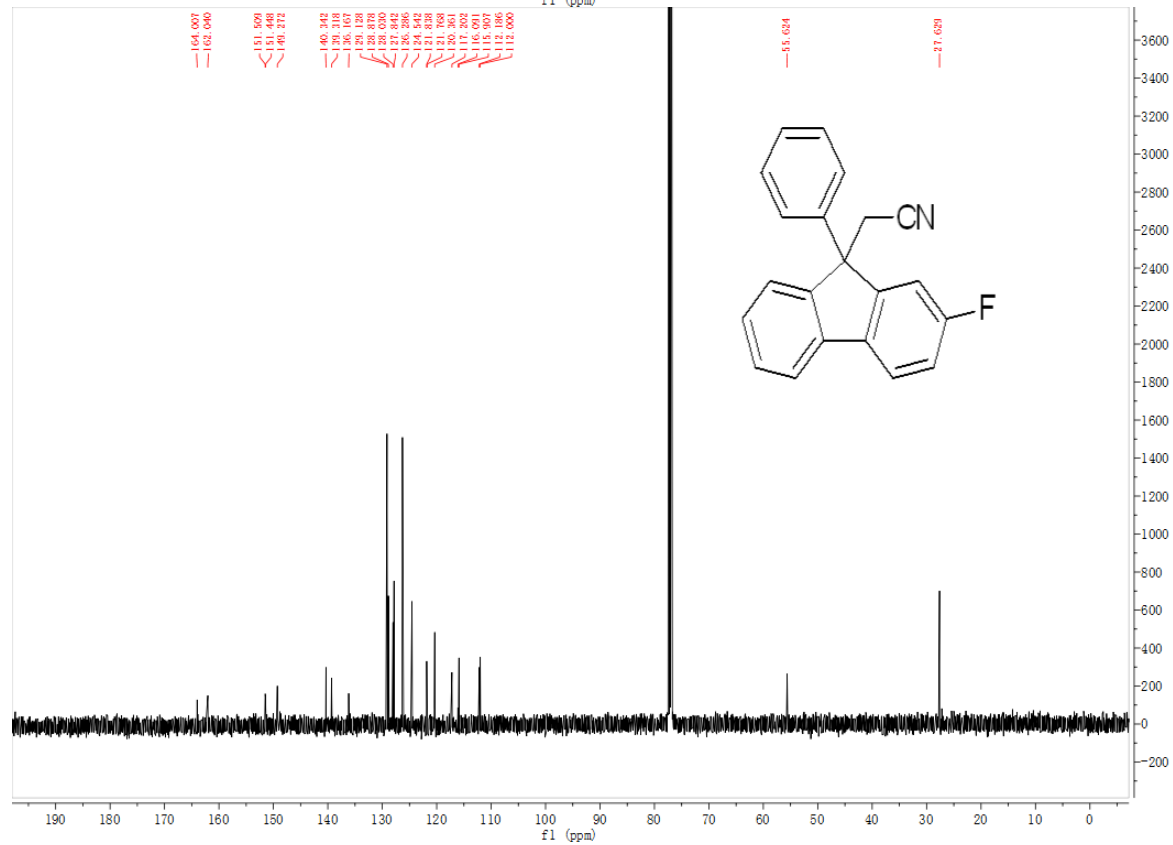



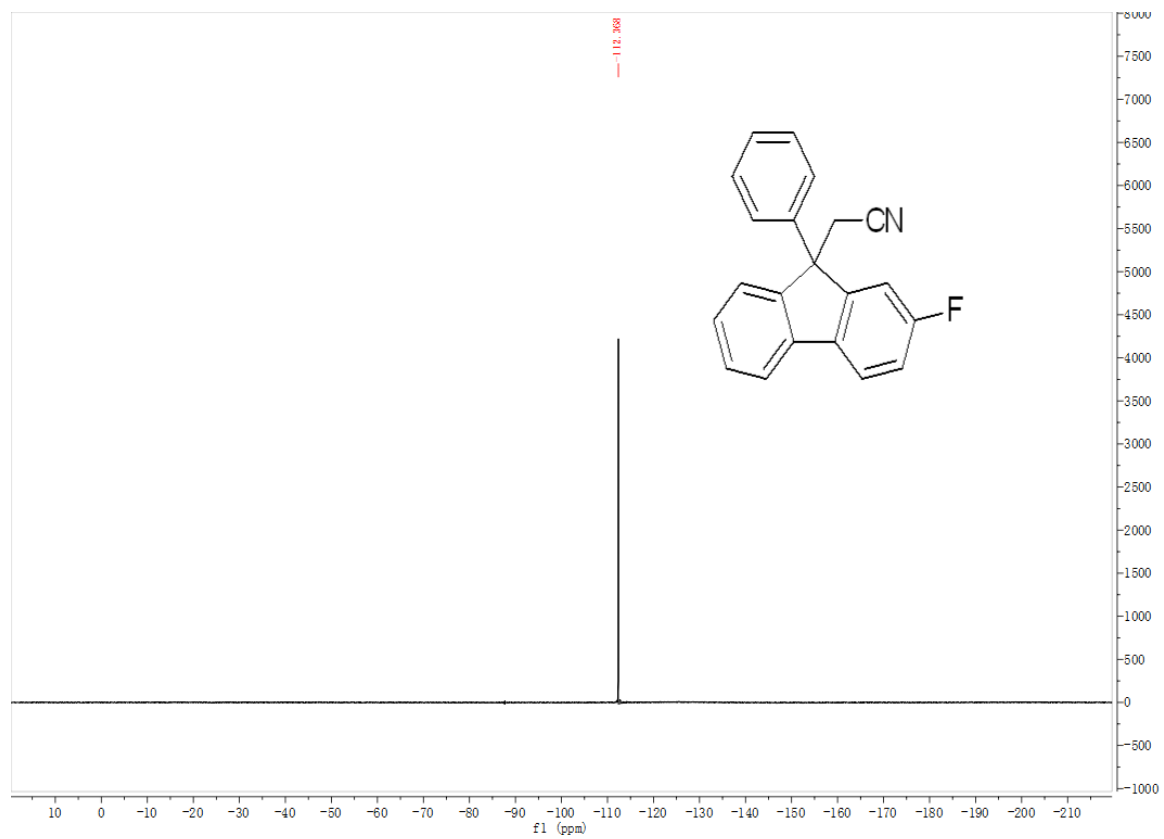

**6pa**  $^1\text{H}$  NMR (500 MHz,  $\text{CDCl}_3$ ),  $^{13}\text{C}$  NMR (125 MHz,  $\text{CDCl}_3$ )

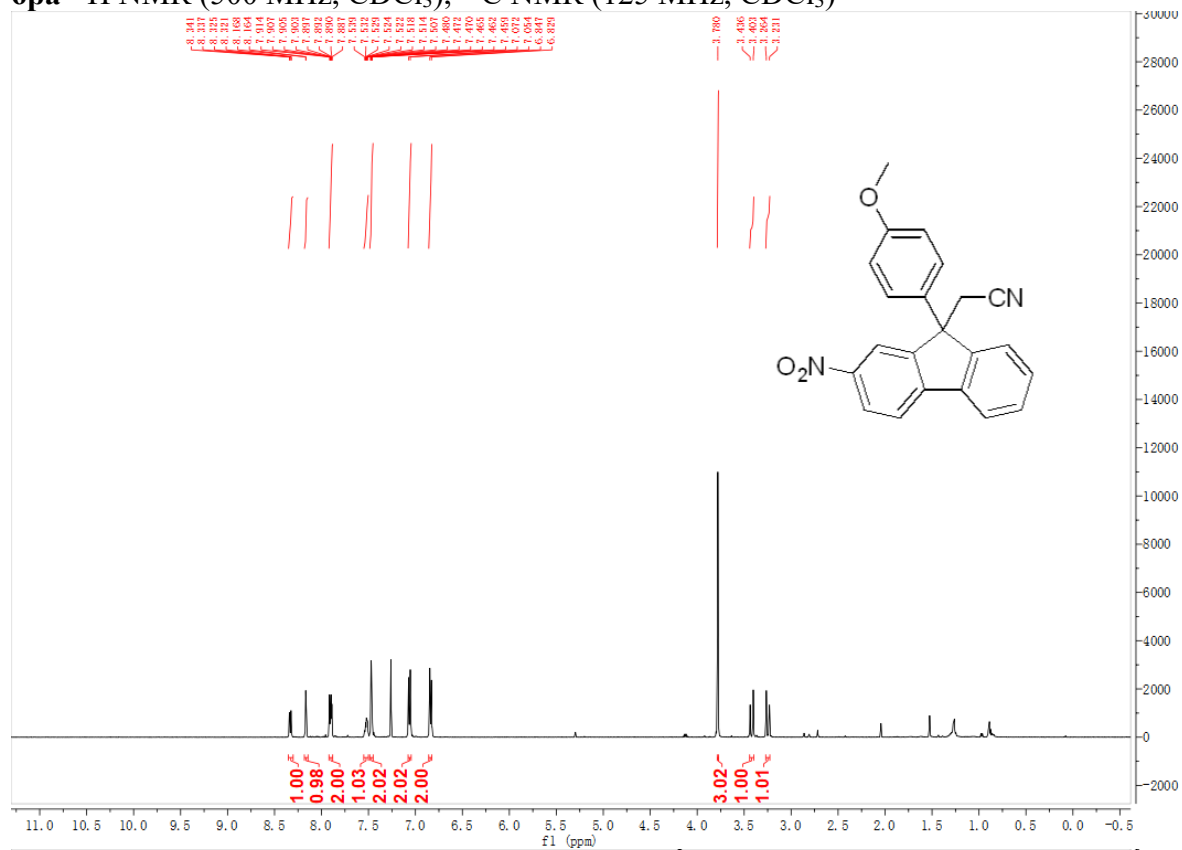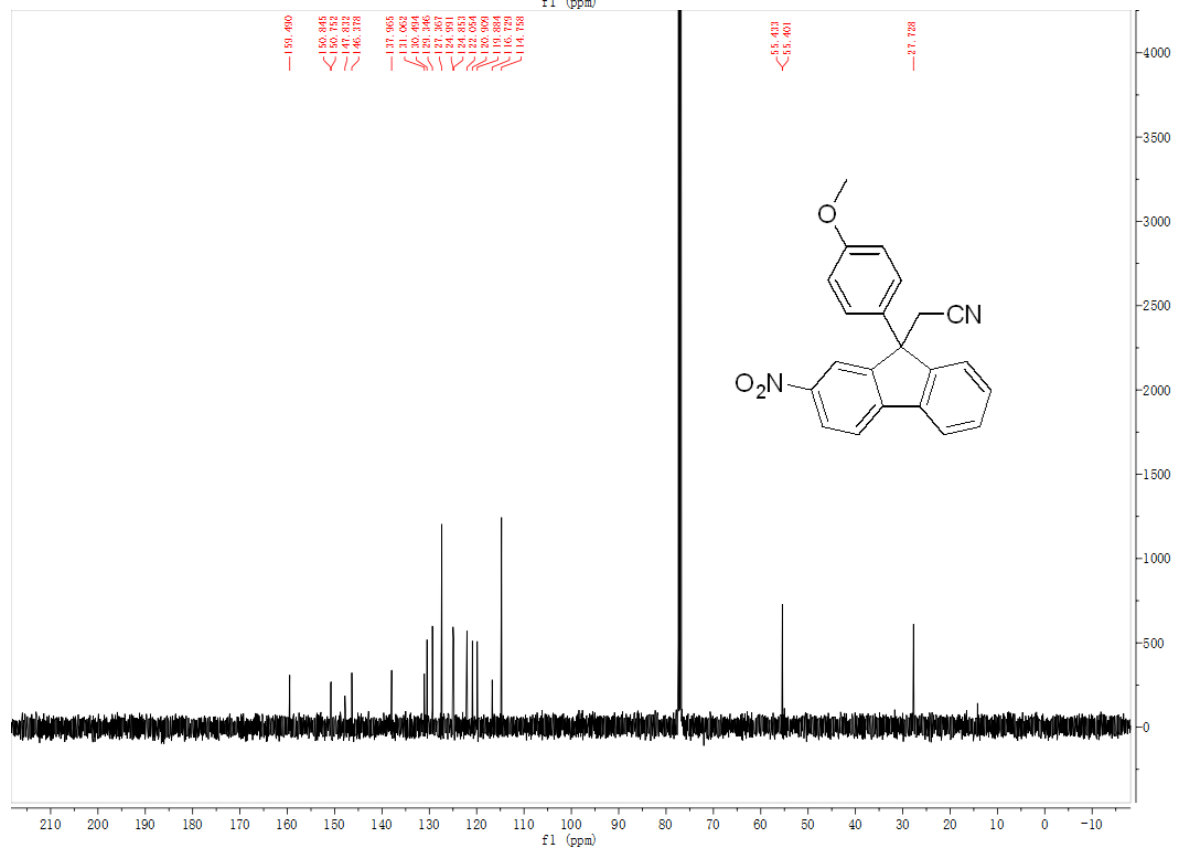

**6qa**  $^1\text{H}$  NMR (500 MHz,  $\text{CDCl}_3$ ),  $^{13}\text{C}$  NMR (125 MHz,  $\text{CDCl}_3$ )

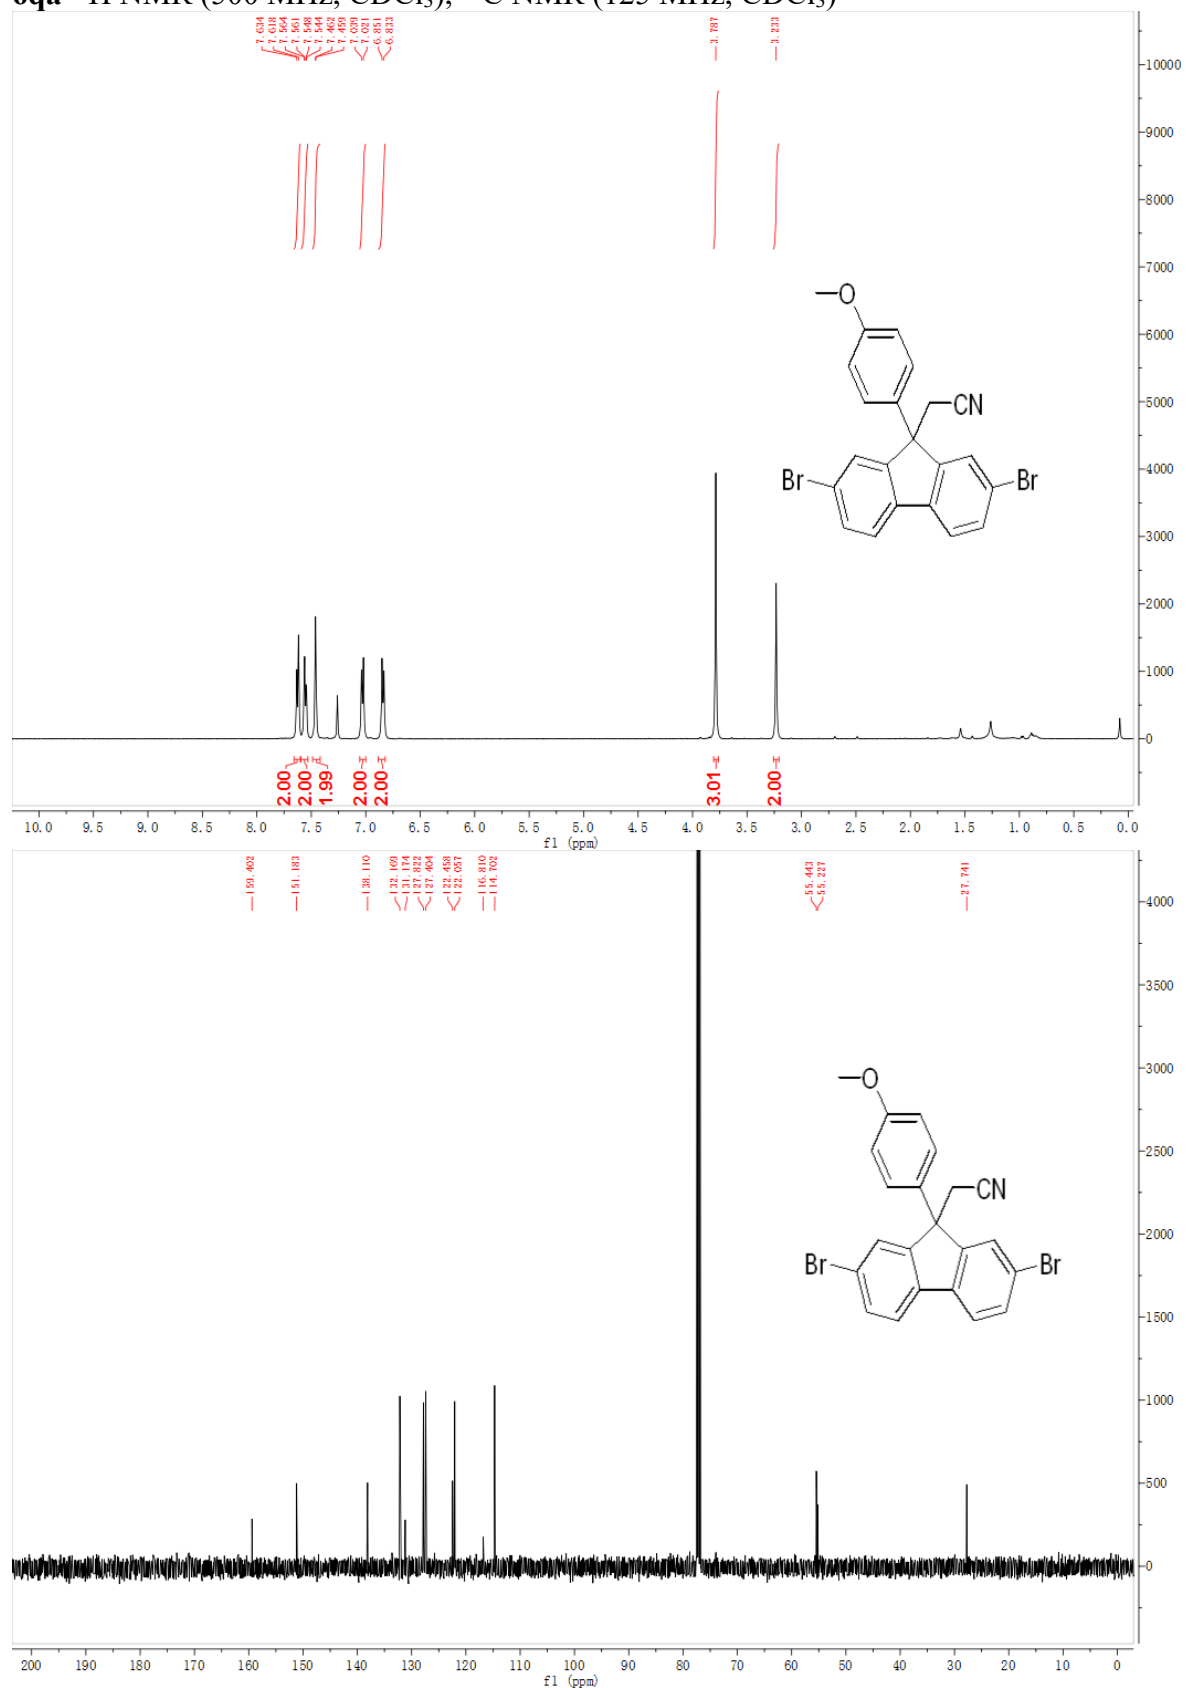

**6ra**  $^1\text{H}$  NMR (500 MHz,  $\text{CDCl}_3$ ),  $^{13}\text{C}$  NMR (125 MHz,  $\text{CDCl}_3$ )

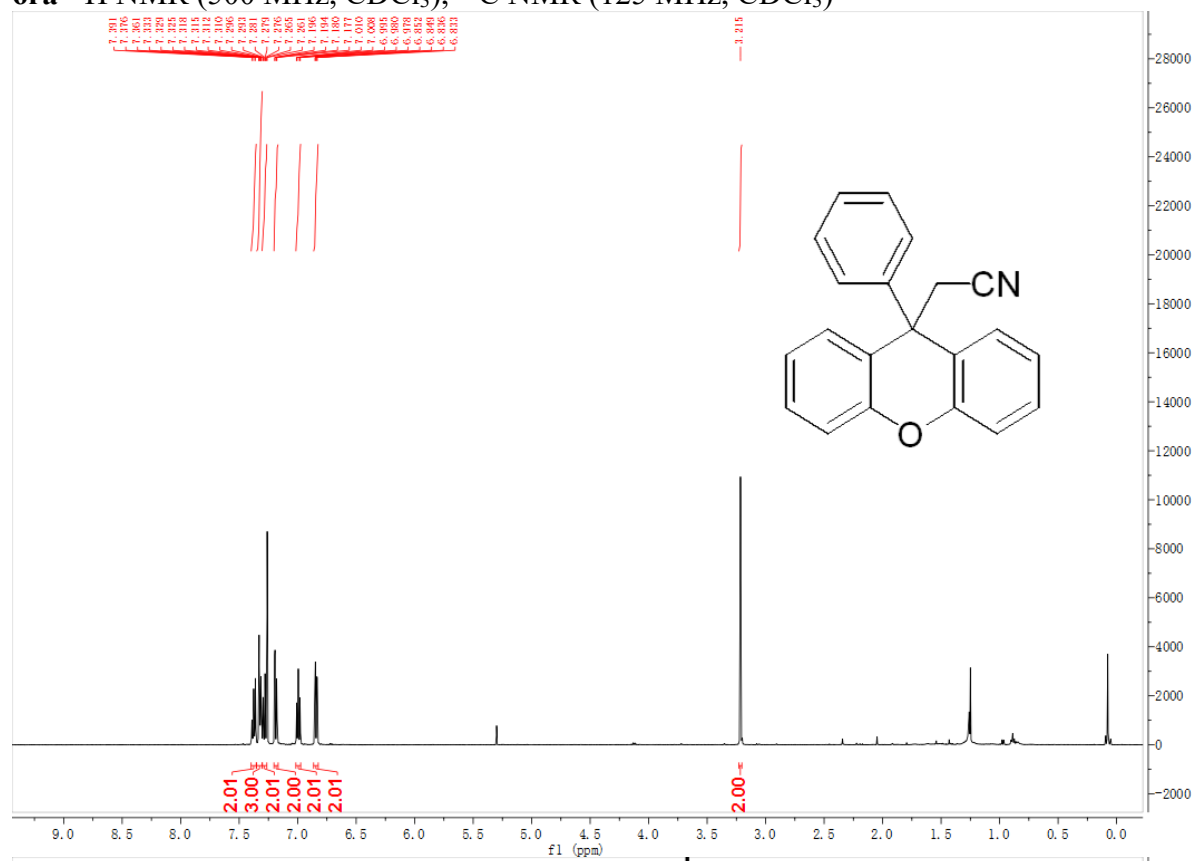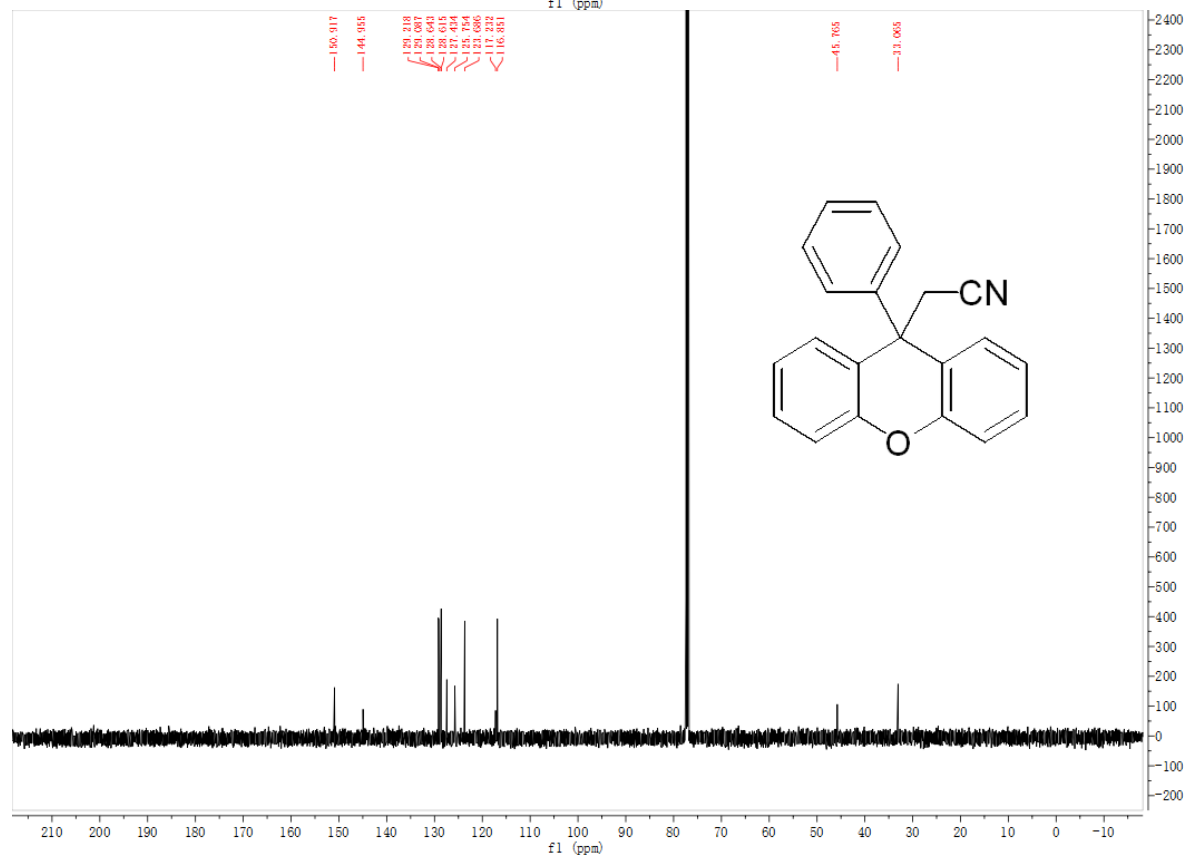

**6ab**  $^1\text{H}$  NMR (500 MHz,  $\text{CDCl}_3$ ),  $^{13}\text{C}$  NMR (125 MHz,  $\text{CDCl}_3$ )

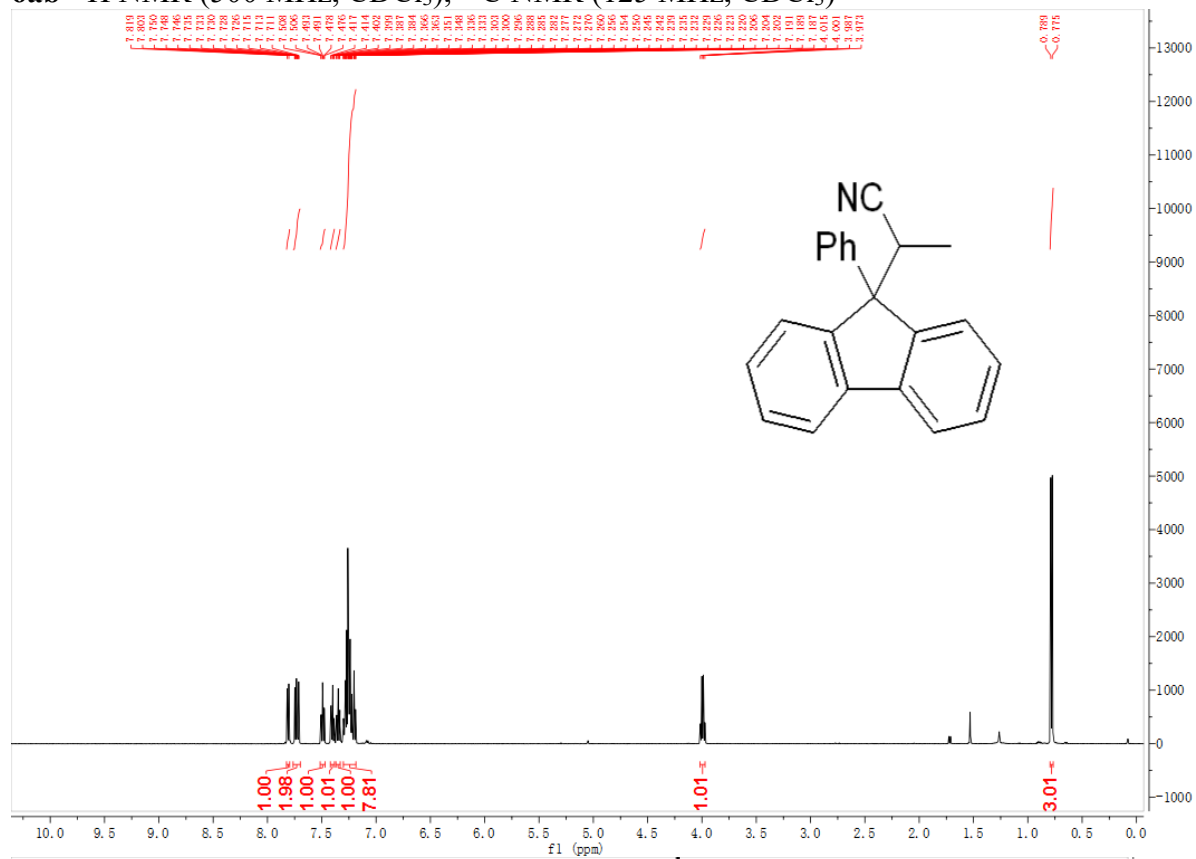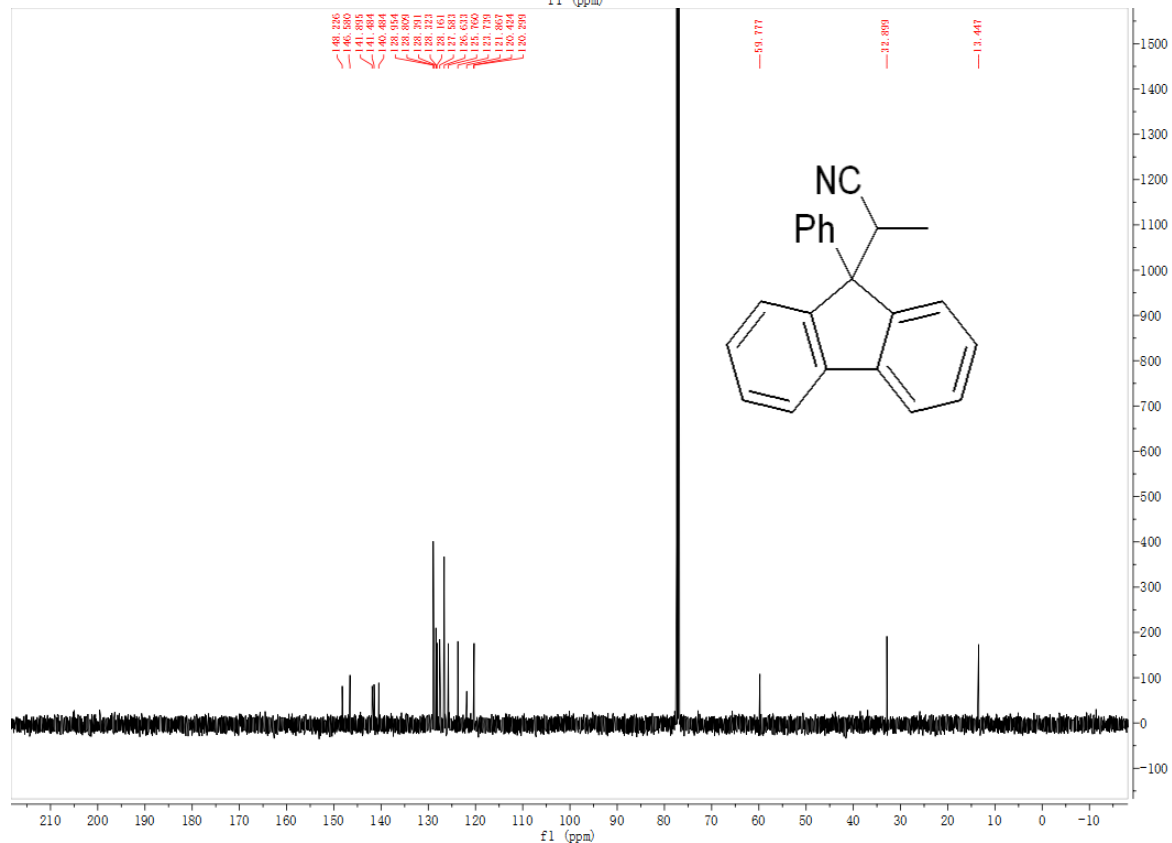

**6ac**  $^1\text{H}$  NMR (500 MHz,  $\text{CDCl}_3$ ),  $^{13}\text{C}$  NMR (125 MHz,  $\text{CDCl}_3$ )

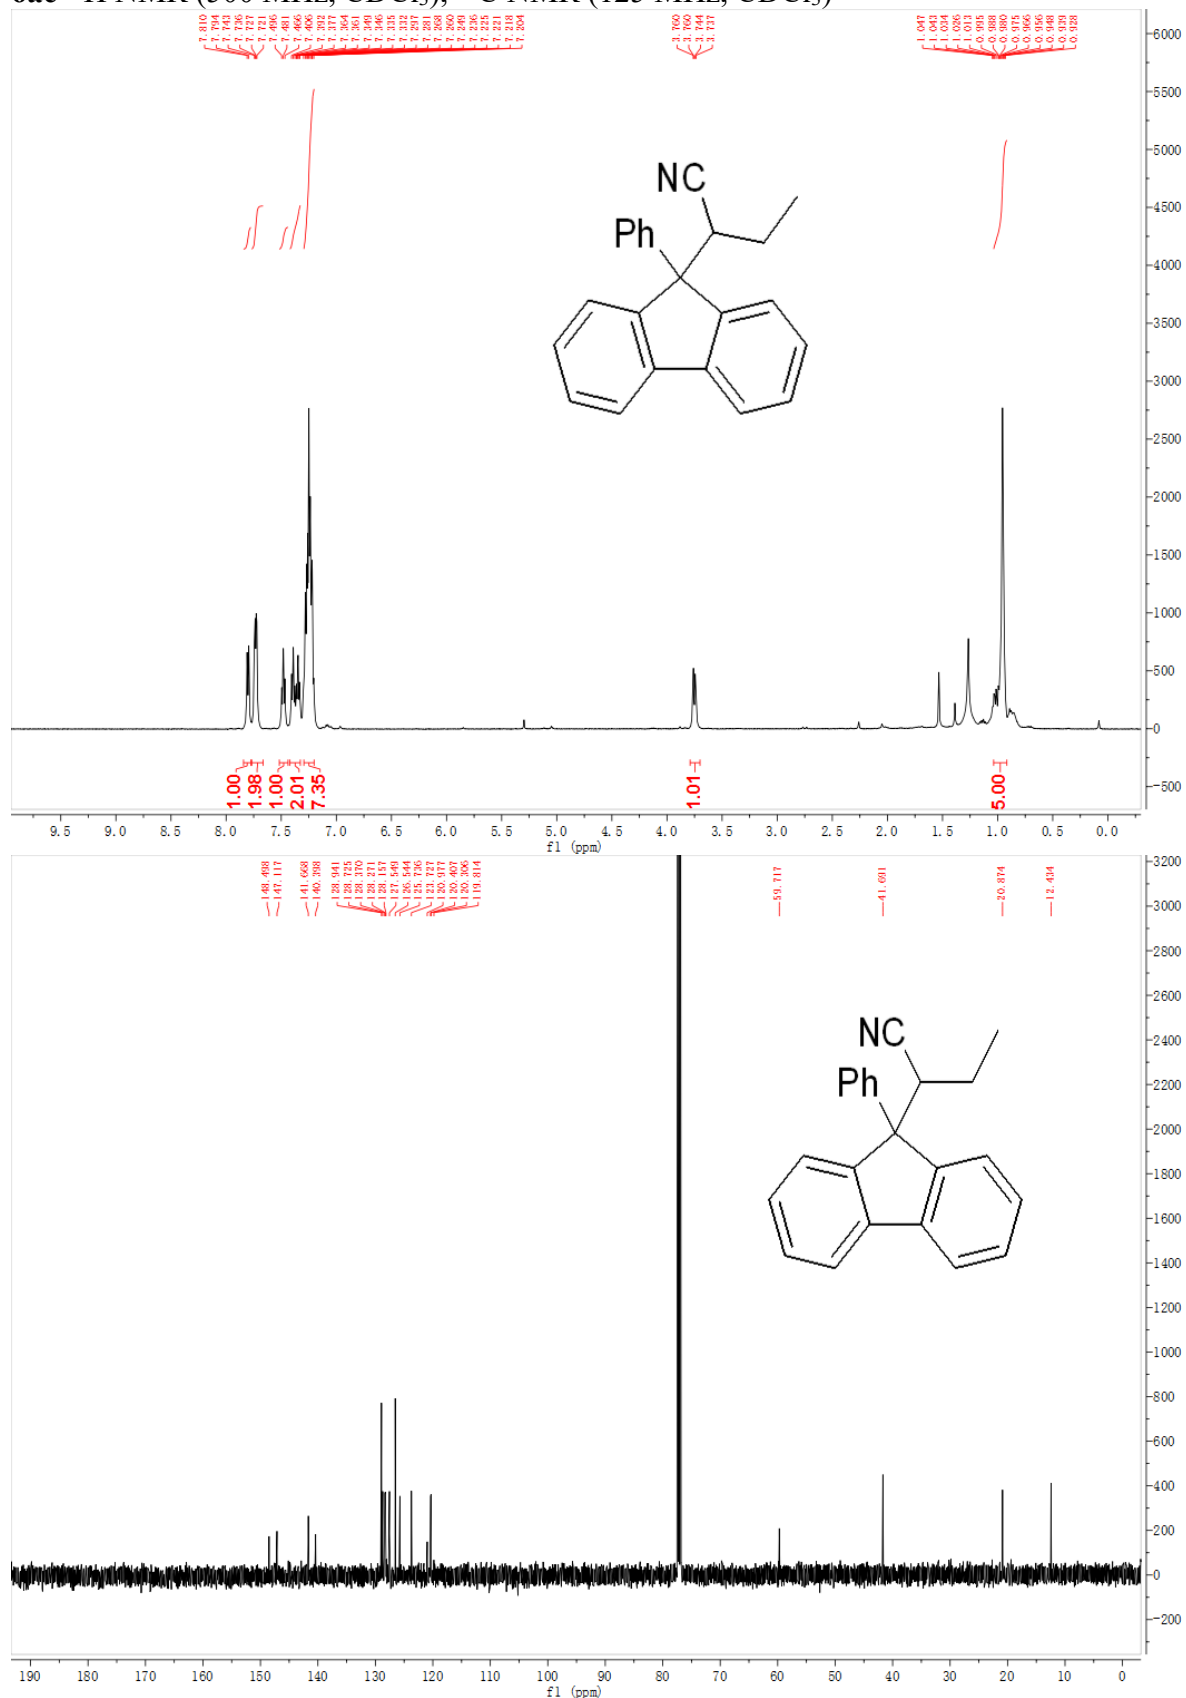

**6ad**  $^1\text{H}$  NMR (500 MHz,  $\text{CDCl}_3$ ),  $^{13}\text{C}$  NMR (125 MHz,  $\text{CDCl}_3$ )

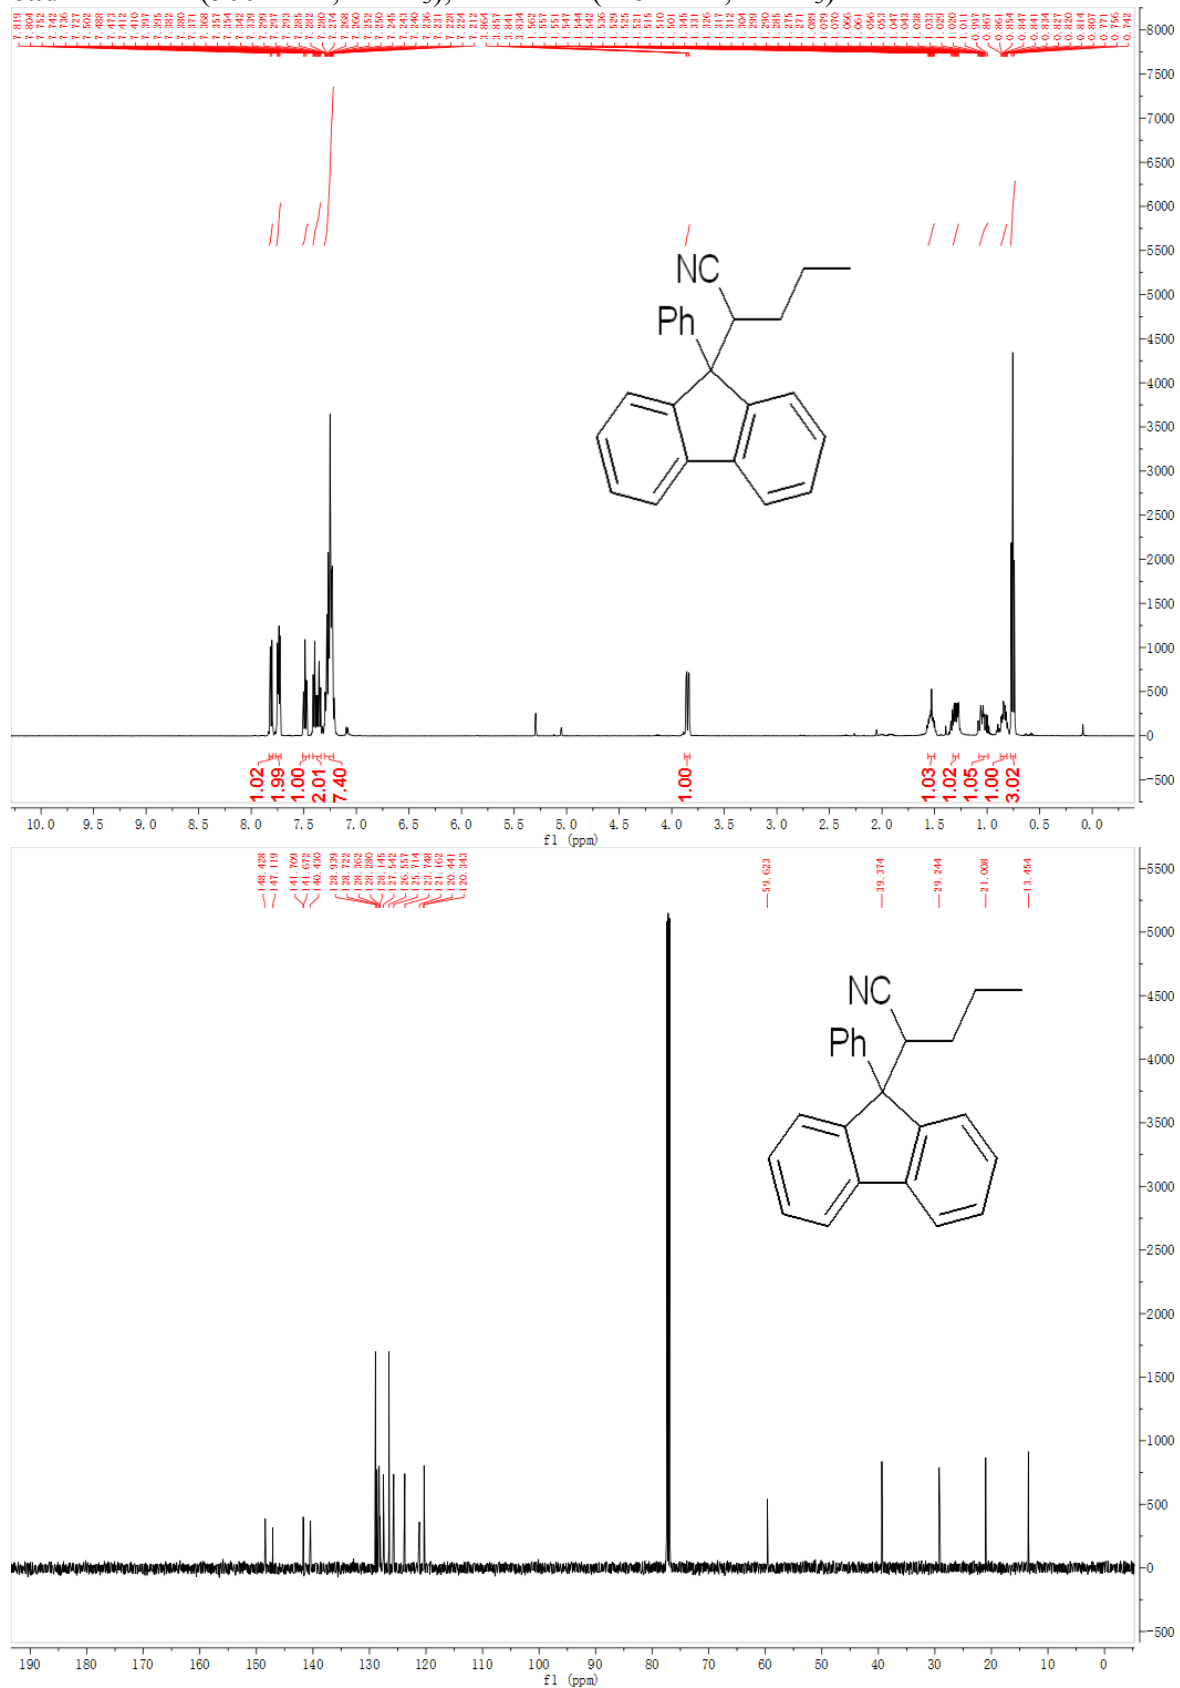

**6ae**  $^1\text{H}$  NMR (500 MHz,  $\text{CDCl}_3$ ),  $^{13}\text{C}$  NMR (125 MHz,  $\text{CDCl}_3$ )

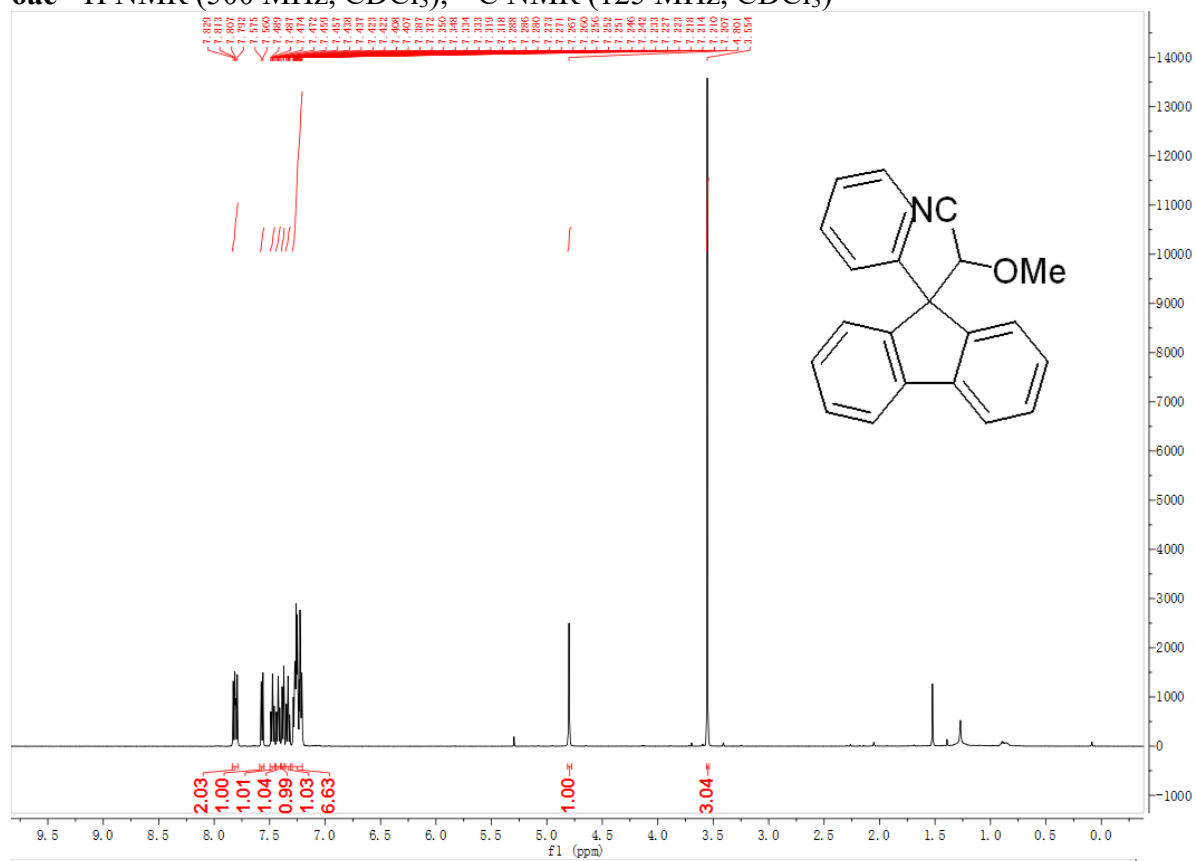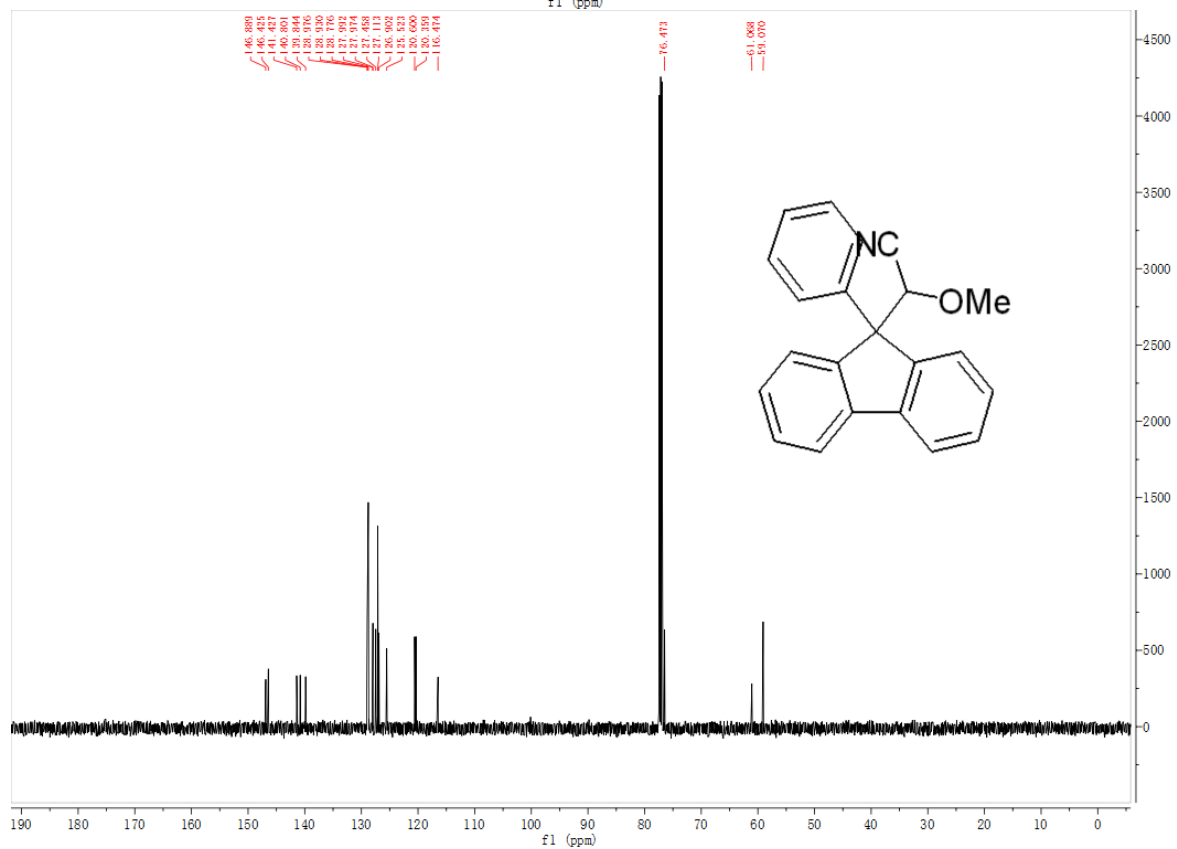



6af  $^1\text{H}$  NMR (500 MHz,  $\text{CDCl}_3$ ),  $^{13}\text{C}$  NMR (125 MHz,  $\text{CDCl}_3$ )

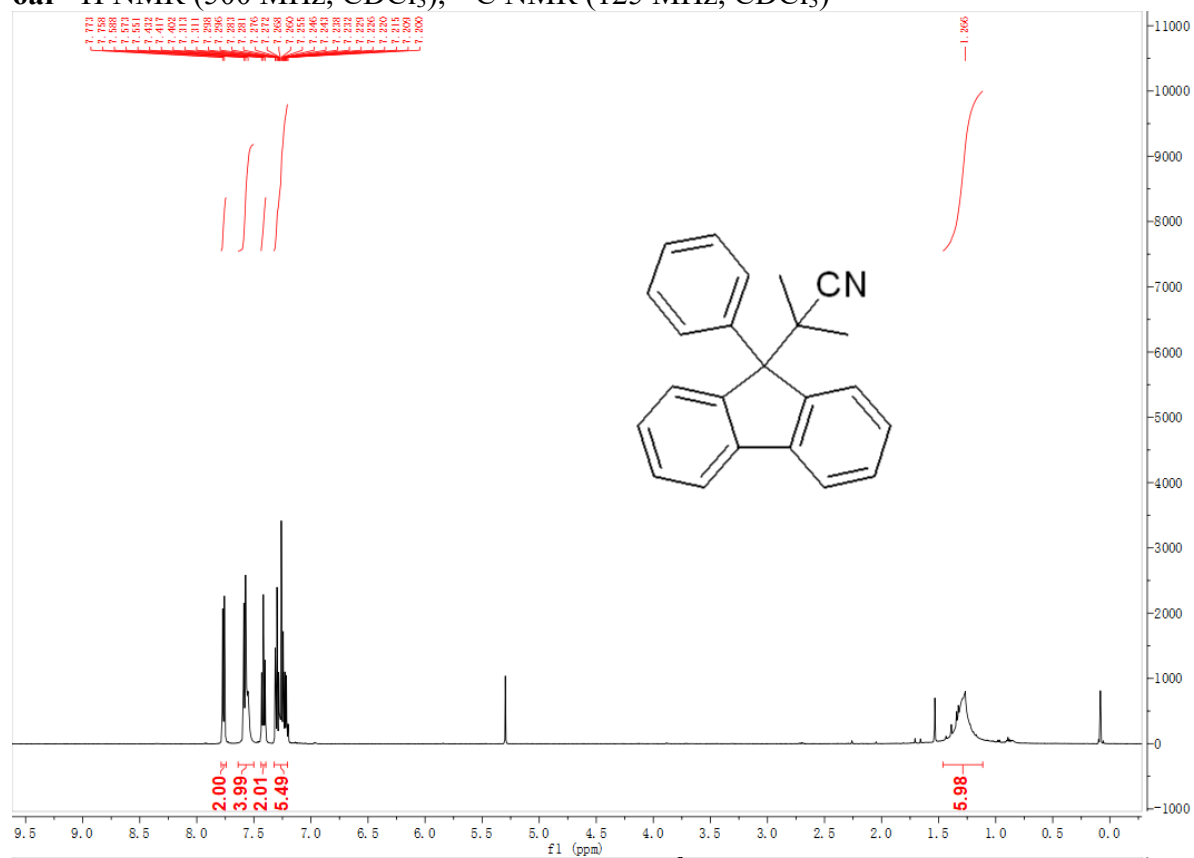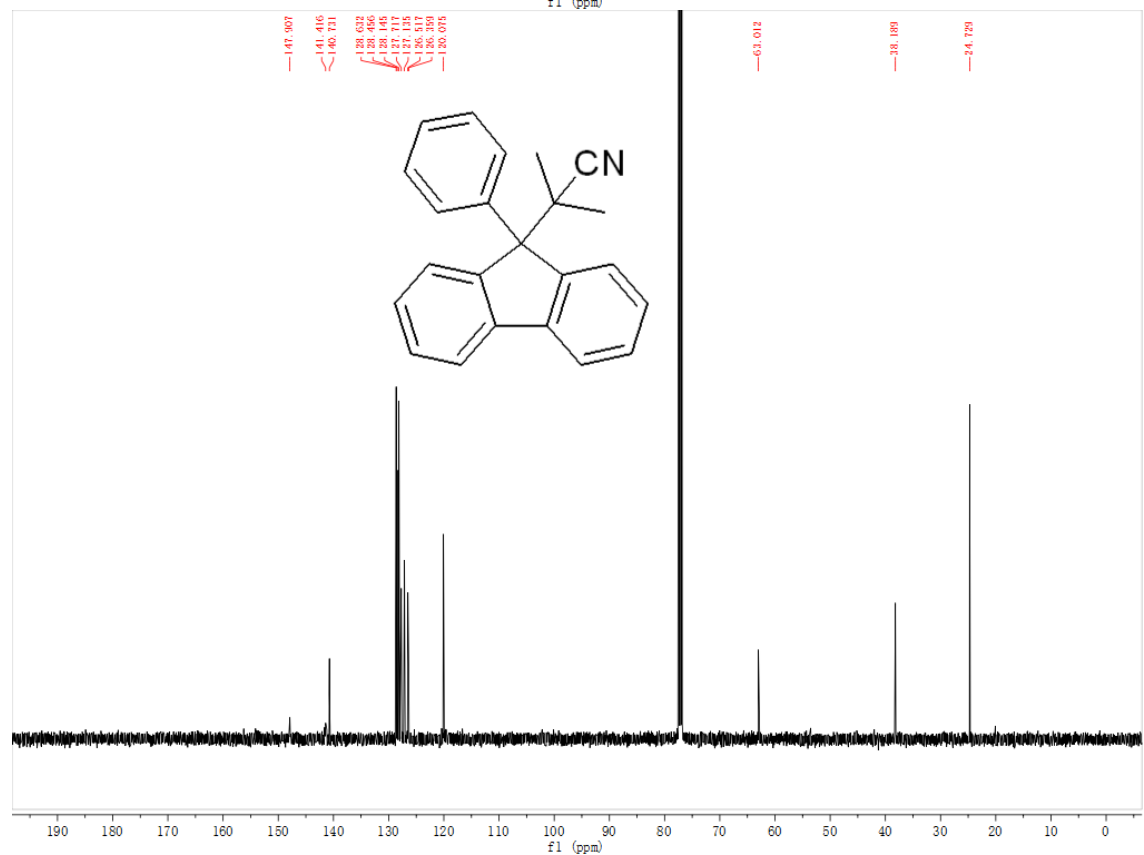

**6ag**  $^1\text{H}$  NMR (500 MHz,  $\text{CDCl}_3$ ),  $^{13}\text{C}$  NMR (125 MHz,  $\text{CDCl}_3$ )

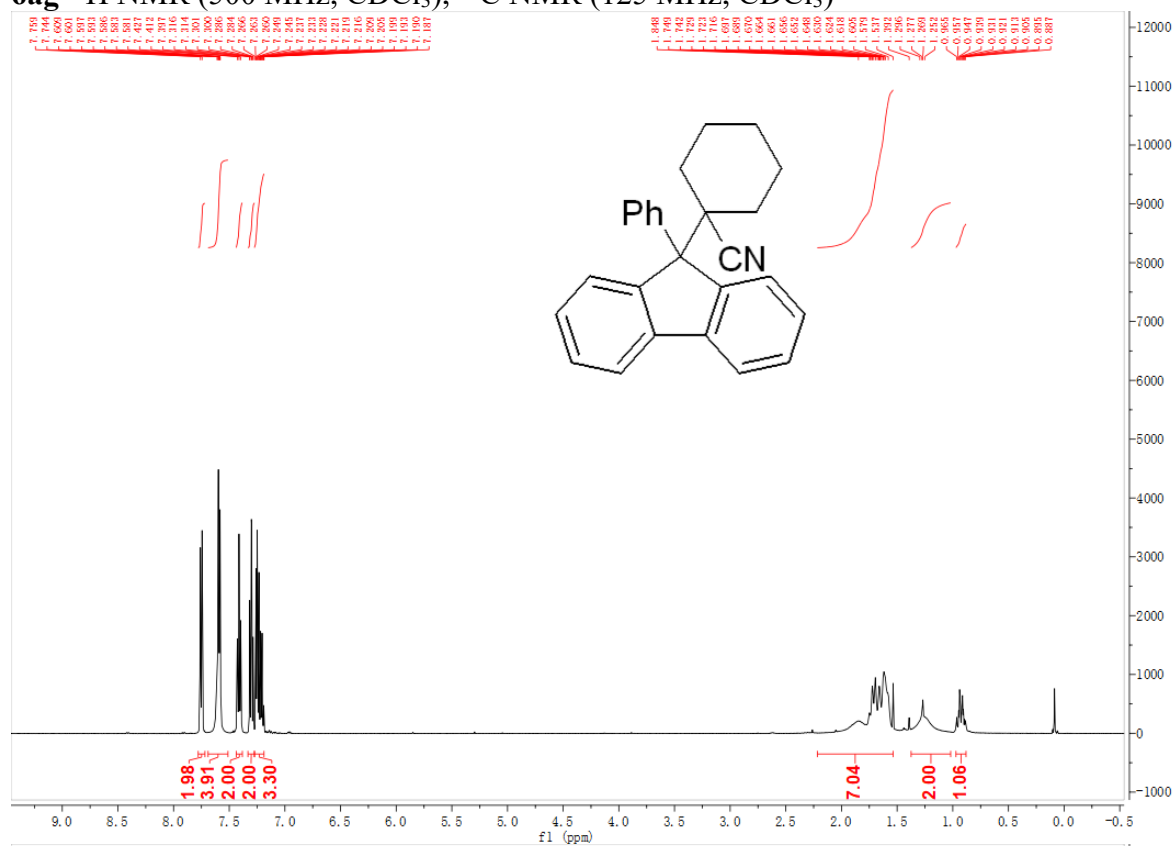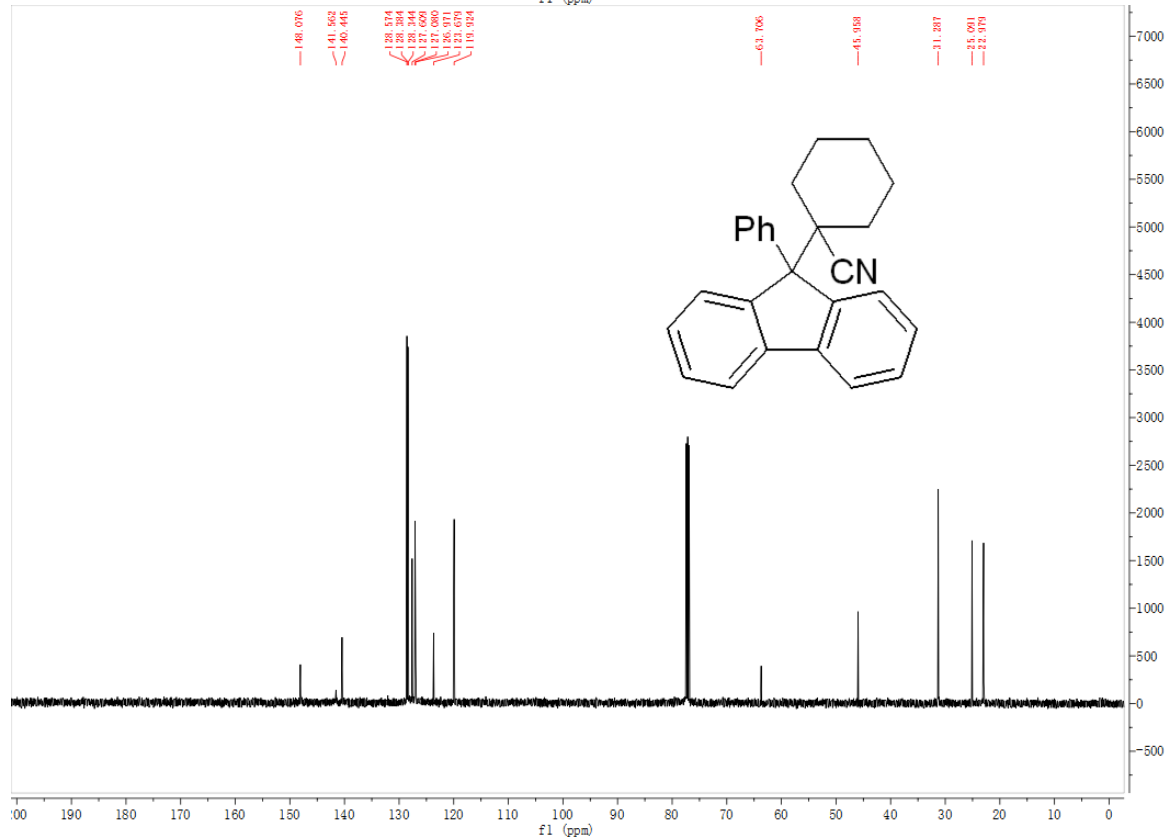

6  $^1\text{H}$  NMR (500 MHz,  $\text{CDCl}_3$ ),  $^{13}\text{C}$  NMR (125 MHz,  $\text{CDCl}_3$ )

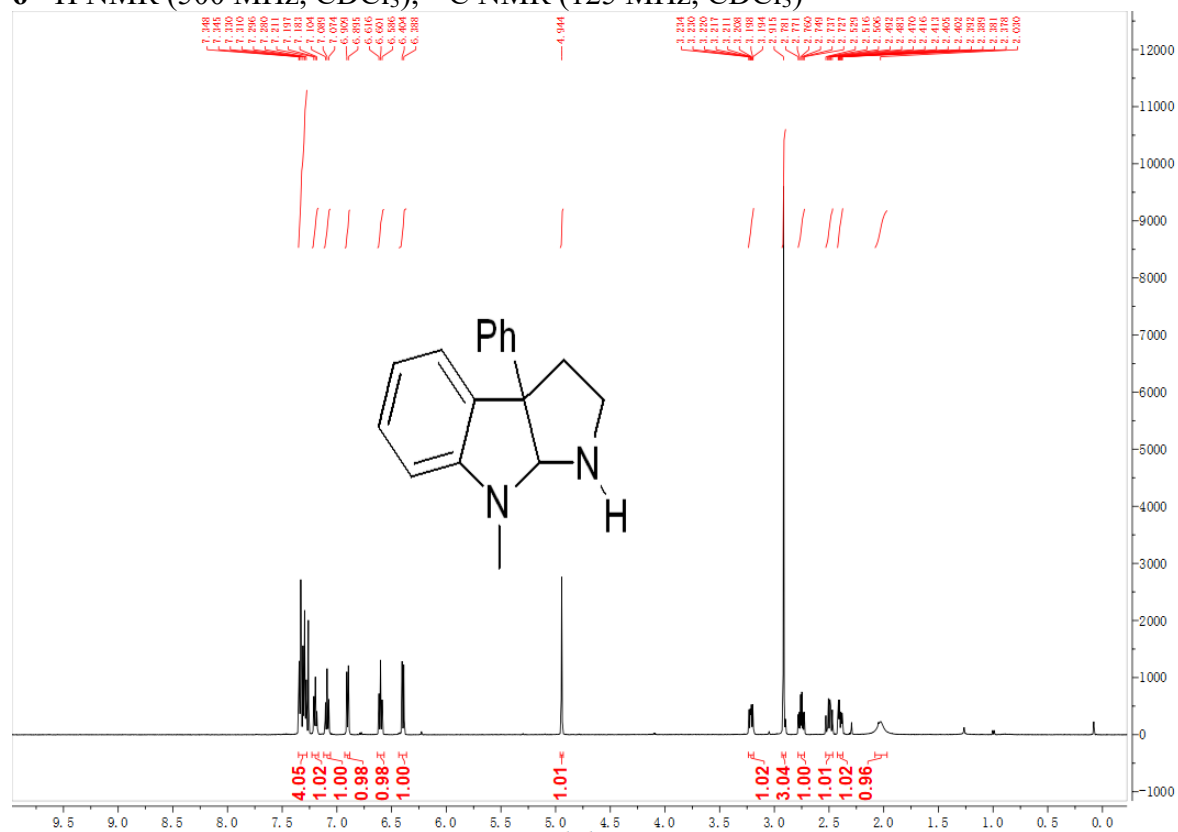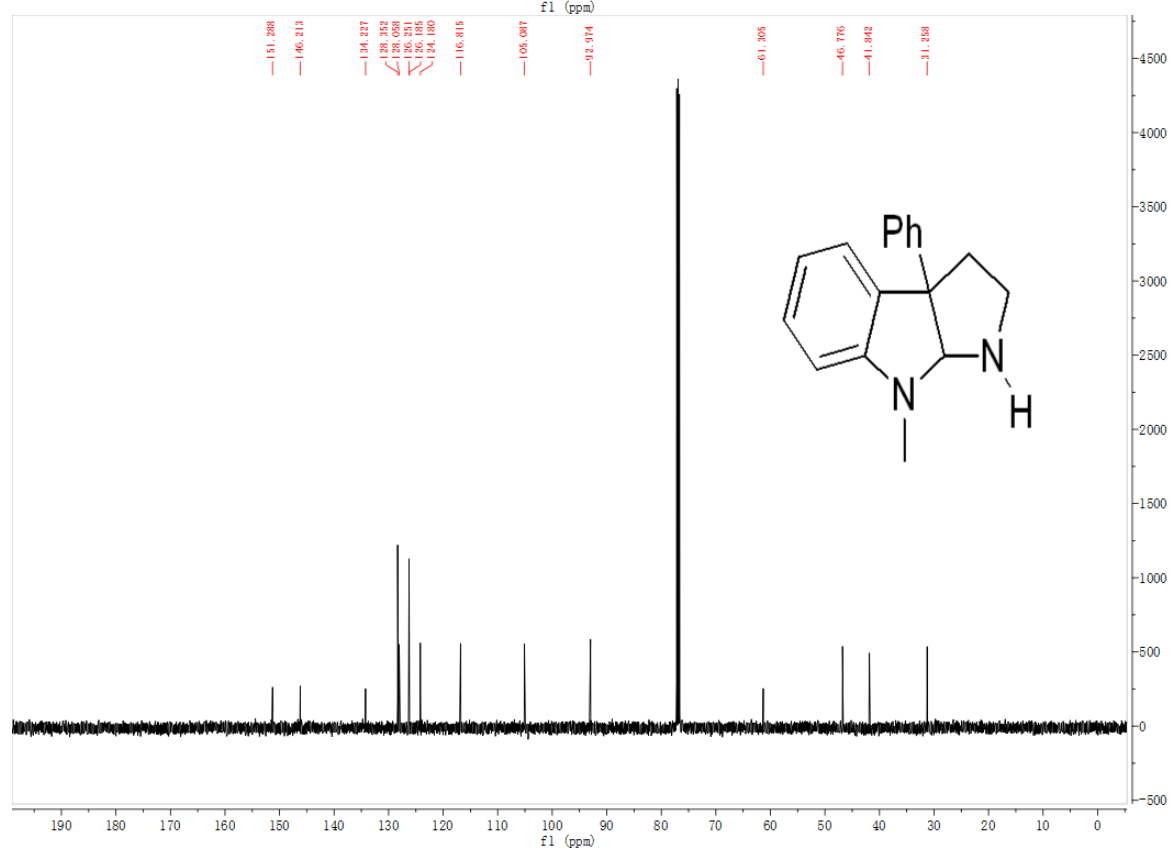

10 <sup>1</sup>H NMR (500 MHz, CDCl<sub>3</sub>)

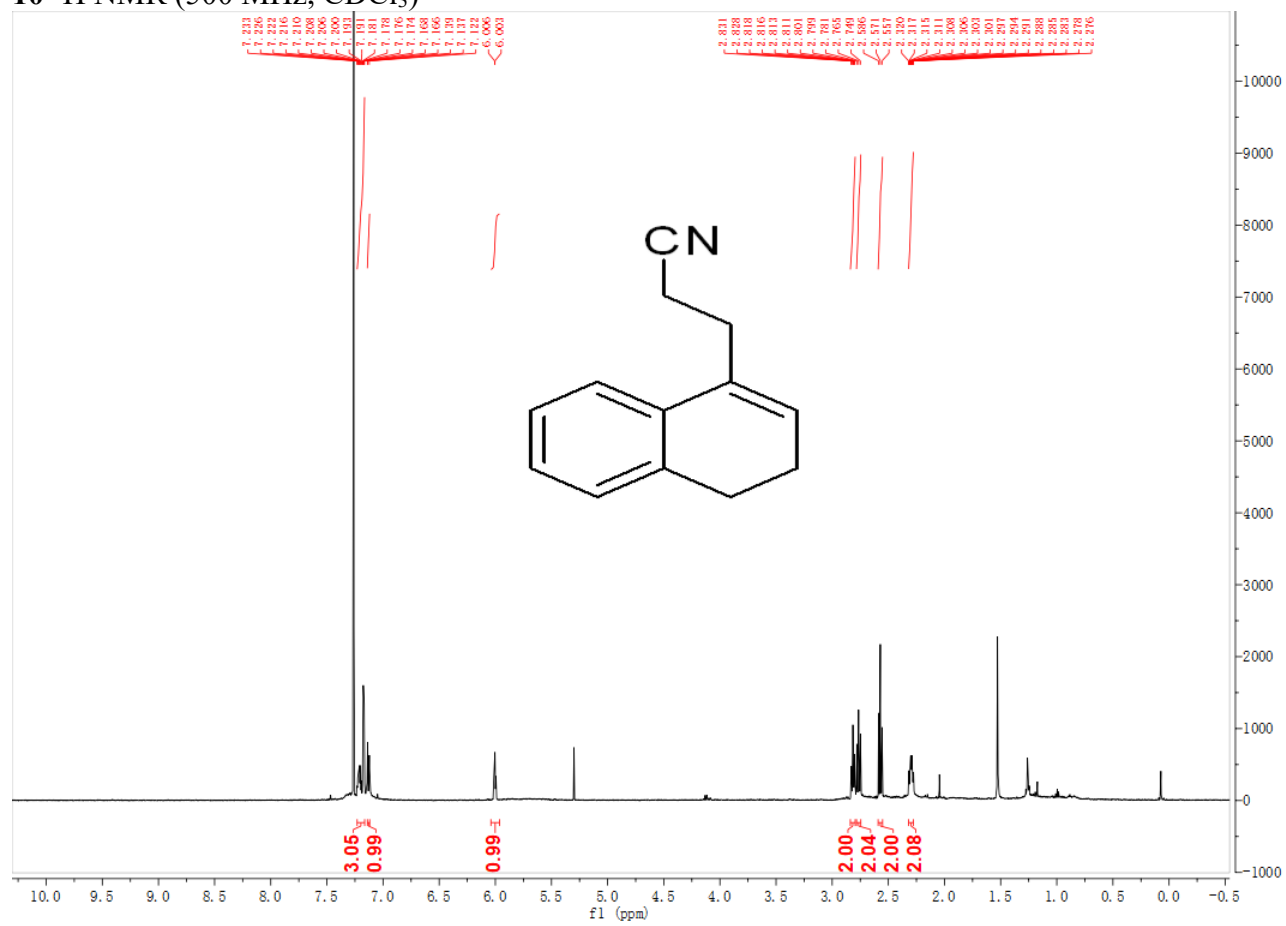

Supplement: NIHMS1558167-supplement-Supporting_Information.pdf [file NIHMS1558167-supplement-Supporting_Information.pdf]
